# Supplementary material for: The genomic landscape of cohesin-associated chromatin interactions
Source: HighWire-hosted journal article supplement (doi:10.1101/gr.156570.113), 2013-05-23
Supplement: Supplemental_Tables_2.xlsx [file Supplemental_Tables_2.xlsx]

## Sheet: Table S1
Table S1. Summary of ChIP-seq and RNA-seq data generated in this study
Experiment/antibody	Tissue Type	Replicate	Total Input reads	Total Sample reads	Aligned Input reads	Aligned Sample reads	p-value threshhold	Total Enriched Regions
Smc1a	E11.5 limb	1	54142443	45567467	42474364	37075281	1e-05	34120
Smc1a	E11.5 limb	2	39085609	44918639	30428467	36088393	1e-05	30692
Smc1a	E14.5 cortex	1	22855431	25,214,382	20648928	25214406	1e-05	25087
CTCF	E10.5 forelimb	1	28841094	22274999	22259905	16507673	1e-05	10563
CTCF	E10.5 forelimb	2	44165670	44200100	33079231	34153566	1e-05	21687
CTCF	E10.5 hindlimb	1	26345711	28491396	19885443	20109578	1e-05	14859
CTCF	E10.5 hindlimb	2	43651489	40090245	33848521	29066659	1e-05	25708
CTCF	E11.5 limb	1	69458743	59166004	54922188	45300221	1e-05	10086
H3K27ac	E14.5 cortex	1	44241807	57976948	32396659	44162538	1e-05	25017
H3K4me2	E11.5 limb	1	47139265	50880582	36083405	42268659	1e-05	41314
H3K4me2	E14.5 cortex	1	44241807	40078295	32396659	32799836	1e-05	32366
H3K27me3	E11.5 limb	1	39085609	45936399	30428467	34894378	1e-05	25653
H3K27me3	E11.5 cortex	1	84808826	93284078	65447964	48542875	1e-05	69346
RNA-seq FL	E11.5 forelimb	1	-	62913088	-	57562347	-	-
RNA-seq HL	E11.5 hindlimb	1	-	57014075	-	52149567	-	-

## Sheet: Table S2
Table S2. Summary of Smc1a ChIA-PET sequencing and data processing
	Library 1		Library 2		Combined
	PE1	PE2	PE1	PE2	PE1	PE2
Total reads	181072648	181072648	157834678	157834678	338907326	338907326
Trimmed	94452537	92320008	26980371	23046479	121432908	115366487
Total aligned	30219130	35856463	11019001	9386994	41238131	45243457
Joined Mate Pairs		10860627		2591555		13452182
Unique Mate Pairs		378174		296164		674338
Ligations
Self (< 5kb)		116746		113551		230297
Intra-chromosomal (> 5 kb)		15629		12691		28320
Inter-chromosomal		245799		169922		415721
Total		378174		296164		674338
Ligations mapping to Smc1a peaks
All intra-chromosomal		2407		3696		6090
Intra-chrom < 10Mb		840		2033		2860
Intra-chrom <1 Mb (FDR ≤ 0.10)		584		1688		2264

## Sheet: Table S3
Table S3. Smc1a ChIA-PET interaction coordinates (mm9)
Anchor 1			Anchor 2
chr	start	stop	chr	start	stop	Classification
chr9	22429471	22429472	chr9	22884841	22884842	intronic-intergenic
chr4	142828726	142828727	chr4	142626923	142626924	intergenic-intronic
chr8	26540759	26540760	chr8	26605585	26605586	intergenic-intergenic
chr5	141012794	141012795	chr5	141084304	141084305	intergenic-intronic
chr3	120966498	120966499	chr3	120994201	120994202	promoter-promoter
chr4	49580691	49580692	chr4	49639942	49639943	intergenic-intergenic
chrX	131281309	131281310	chrX	131413109	131413110	intergenic-intergenic
chr11	11720383	11720384	chr11	11836895	11836896	intronic-intronic
chr10	21098618	21098619	chr10	20915007	20915008	intronic-intergenic
chr2	167363777	167363778	chr2	167430567	167430568	promoter-intronic
chr2	173055145	173055146	chr2	173877113	173877114	intronic-intergenic
chr1	157568469	157568470	chr1	157276475	157276476	intronic-intergenic
chr12	30884643	30884644	chr12	31054780	31054781	intronic-intronic
chr19	36612403	36612404	chr19	36502748	36502749	intergenic-intronic
chr13	26026441	26026442	chr13	26208290	26208291	intronic-intergenic
chr2	35517678	35517679	chr2	35558301	35558302	intronic-intronic
chr8	114061562	114061563	chr8	114096201	114096202	promoter-intronic
chr14	31292795	31292796	chr14	31196873	31196874	promoter-intronic
chr13	52348627	52348628	chr13	52626158	52626159	intergenic-promoter
chr8	91549881	91549882	chr8	92535497	92535498	intergenic-intergenic
chr2	152441587	152441588	chr2	152504104	152504105	intergenic-intronic
chr1	80719752	80719753	chr1	80649131	80649132	intronic-intronic
chr16	89943830	89943831	chr16	89985792	89985793	intronic-intronic
chr10	119694583	119694584	chr10	120003041	120003042	intergenic-intergenic
chr2	32712865	32712866	chr2	33152406	33152407	intergenic-intronic
chr13	60548473	60548474	chr13	60450603	60450604	intergenic-intergenic
chr2	155674287	155674288	chr2	155772277	155772278	intronic-intergenic
chr14	67986920	67986921	chr14	67929227	67929228	intronic-intronic
chr14	121436733	121436734	chr14	121494446	121494447	intronic-intronic
chr8	90184894	90184895	chr8	90769461	90769462	intergenic-intronic
chr9	42572932	42572933	chr9	42615666	42615667	intronic-intronic
chr17	83677286	83677287	chr17	83750188	83750189	intergenic-promoter
chr17	87665116	87665117	chr17	87714375	87714376	promoter-intronic
chr11	116855059	116855060	chr11	116686430	116686431	intergenic-intronic
chr5	35704864	35704865	chr5	35906344	35906345	promoter-intronic
chr9	61222074	61222075	chr9	61747901	61747902	promoter-intergenic
chr1	168279965	168279966	chr1	168312472	168312473	intergenic-intronic
chr5	125754539	125754540	chr5	125849195	125849196	intergenic-intergenic
chr4	148275154	148275155	chr4	148353287	148353288	intronic-intronic
chr3	104881297	104881298	chr3	105260386	105260387	intergenic-intronic
chr14	48092129	48092130	chr14	48110387	48110388	promoter-intronic
chr10	116417933	116417934	chr10	116471007	116471008	intergenic-intergenic
chr11	114497774	114497775	chr11	113964338	113964339	intergenic-intergenic
chr11	95483947	95483948	chr11	95510372	95510373	intergenic-intergenic
chr5	65461016	65461017	chr5	65559716	65559717	intergenic-intergenic
chr2	31640794	31640795	chr2	31589294	31589295	intronic-intronic
chr9	120714019	120714020	chr9	120842600	120842601	intergenic-promoter
chr7	75448895	75448896	chr7	75502480	75502481	intronic-intronic
chr11	111690005	111690006	chr11	111905755	111905756	intergenic-intergenic
chr10	6605153	6605154	chr10	6772209	6772210	promoter-intergenic
chr3	122341794	122341795	chr3	122494557	122494558	intergenic-intronic
chr17	29232175	29232176	chr17	29201371	29201372	intronic-intronic
chr18	82639710	82639711	chr18	82738549	82738550	intergenic-intronic
chr11	63589542	63589543	chr11	63627681	63627682	intergenic-intergenic
chr6	142473595	142473596	chr6	142683772	142683773	intergenic-intergenic
chr10	8043199	8043200	chr10	8236899	8236900	intronic-intronic
chr1	134017958	134017959	chr1	134036254	134036255	intronic-promoter
chr4	140698386	140698387	chr4	140642924	140642925	intergenic-intergenic
chr17	56565045	56565046	chr17	56627231	56627232	exonic-intergenic
chr1	94350504	94350505	chr1	94544468	94544469	intronic-promoter
chr4	99769815	99769816	chr4	99809589	99809590	intronic-intronic
chr18	39100359	39100360	chr18	39152675	39152676	intronic-promoter
chr3	127337121	127337122	chr3	127522253	127522254	exonic-intronic
chr15	11338145	11338146	chr15	11837855	11837856	intergenic-promoter
chr13	47951037	47951038	chr13	48218904	48218905	intergenic-intronic
chr4	139026352	139026353	chr4	139192521	139192522	intronic-intronic
chr10	119083923	119083924	chr10	118848202	118848203	intronic-intergenic
chr9	121280844	121280845	chr9	121228581	121228582	intronic-intronic
chr1	191684253	191684254	chr1	191649791	191649792	intronic-intronic
chr13	54150769	54150770	chr13	53992231	53992232	promoter-intergenic
chr11	12273200	12273201	chr11	12443276	12443277	intronic-intergenic
chr4	124387187	124387188	chr4	124357642	124357643	intergenic-intronic
chr5	36660464	36660465	chr5	36404216	36404217	intronic-intronic
chr1	157006945	157006946	chr1	157024408	157024409	intronic-promoter
chr1	167525055	167525056	chr1	167499745	167499746	intronic-intronic
chr9	45397738	45397739	chr9	45562956	45562957	intronic-intergenic
chr10	94566854	94566855	chr10	94998834	94998835	intergenic-intronic
chr11	5896155	5896156	chr11	6161798	6161799	intronic-intronic
chr18	65650850	65650851	chr18	65902847	65902848	intergenic-intronic
chr13	72777381	72777382	chr13	73224994	73224995	intergenic-intergenic
chr4	96455592	96455593	chr4	96933846	96933847	intergenic-intergenic
chr11	76188348	76188349	chr11	76211561	76211562	intronic-intronic
chr19	42165036	42165037	chr19	42116931	42116932	promoter-exonic
chr16	10786375	10786376	chr16	10844056	10844057	promoter-intronic
chr15	100949065	100949066	chr15	100959929	100959930	intronic-promoter
chr13	54343663	54343664	chr13	54473532	54473533	intergenic-promoter
chr11	101676289	101676290	chr11	101562351	101562352	intergenic-intergenic
chr7	119323862	119323863	chr7	119301114	119301115	intergenic-promoter
chr11	59339077	59339078	chr11	58706325	58706326	intergenic-intronic
chr15	102574943	102574944	chr15	102853089	102853090	intergenic-intronic
chr4	132563183	132563184	chr4	132765507	132765508	intergenic-exonic
chr13	95559338	95559339	chr13	95636774	95636775	promoter-intergenic
chr19	26681257	26681258	chr19	26785965	26785966	intronic-intronic
chr6	145390595	145390596	chr6	145376482	145376483	intronic-intronic
chr15	84981847	84981848	chr15	85062150	85062151	intronic-intronic
chr10	92115258	92115259	chr10	91541885	91541886	intergenic-intergenic
chr4	141413400	141413401	chr4	141423519	141423520	intergenic-intronic
chr8	91768780	91768781	chr8	91833623	91833624	intergenic-intergenic
chr2	172553199	172553200	chr2	172524541	172524542	intergenic-intergenic
chr4	142828968	142828969	chr4	142624777	142624778	intergenic-intronic
chr7	16880313	16880314	chr7	16895439	16895440	intergenic-promoter
chr8	14368499	14368500	chr8	14841955	14841956	intronic-intronic
chr9	75610755	75610756	chr9	75924823	75924824	intergenic-intronic
chr5	120121255	120121256	chr5	120133043	120133044	promoter-exonic
chr11	97883861	97883862	chr11	97937282	97937283	promoter-intergenic
chr14	56445641	56445642	chr14	56457235	56457236	exonic-intergenic
chr10	26853254	26853255	chr10	27013402	27013403	intronic-intronic
chr9	41282959	41282960	chr9	41759290	41759291	promoter-intergenic
chr2	119076923	119076924	chr2	119096508	119096509	intergenic-promoter
chr16	29734946	29734947	chr16	29661017	29661018	intergenic-intergenic
chr11	88006645	88006646	chr11	87832088	87832089	exonic-intergenic
chr2	94094372	94094373	chr2	93961494	93961495	intronic-intronic
chr17	80063305	80063306	chr17	80240380	80240381	intronic-intergenic
chr12	25402089	25402090	chr12	25633657	25633658	intergenic-intronic
chr6	95048549	95048550	chr6	95433164	95433165	intergenic-intronic
chr16	31878931	31878932	chr16	31917855	31917856	promoter-intergenic
chr2	35437664	35437665	chr2	35489114	35489115	promoter-intronic
chr8	86090332	86090333	chr8	85614456	85614457	promoter-exonic
chr11	118600416	118600417	chr11	118573589	118573590	intronic-intronic
chr8	98357212	98357213	chr8	98344680	98344681	intergenic-intronic
chr8	49064465	49064466	chr8	48087813	48087814	intronic-intronic
chr1	194548704	194548705	chr1	194774348	194774349	intronic-intronic
chr5	125389327	125389328	chr5	125495107	125495108	intergenic-intergenic
chr5	37227663	37227664	chr5	37393470	37393471	intergenic-intergenic
chr9	64982679	64982680	chr9	65035137	65035138	intronic-intergenic
chr11	100030773	100030774	chr11	100064953	100064954	intergenic-intronic
chr7	119969139	119969140	chr7	119964019	119964020	intronic-intronic
chr2	93842647	93842648	chr2	93713067	93713068	intronic-intergenic
chr13	107505939	107505940	chr13	107895215	107895216	intergenic-intergenic
chr5	140768387	140768388	chr5	140314500	140314501	intronic-intergenic
chr18	55291015	55291016	chr18	55355812	55355813	intergenic-intergenic
chr15	82768265	82768266	chr15	82943374	82943375	intergenic-intronic
chr7	117430311	117430312	chr7	117575526	117575527	intergenic-intronic
chr11	113571888	113571889	chr11	113625068	113625069	promoter-intergenic
chr7	87301597	87301598	chr7	87378191	87378192	intergenic-promoter
chr4	153537712	153537713	chr4	153581550	153581551	intronic-intronic
chr7	121357283	121357284	chr7	121282621	121282622	intergenic-intergenic
chr17	45734216	45734217	chr17	45764184	45764185	intronic-intergenic
chr4	149631481	149631482	chr4	149638923	149638924	intergenic-intergenic
chr5	150438253	150438254	chr5	150343647	150343648	promoter-intronic
chr1	135751472	135751473	chr1	135683331	135683332	intergenic-intronic
chr16	18345368	18345369	chr16	18406257	18406258	intergenic-exonic
chr10	94086654	94086655	chr10	94096095	94096096	intergenic-intergenic
chr17	46307399	46307400	chr17	46216369	46216370	intergenic-intergenic
chr2	103823531	103823532	chr2	103816506	103816507	intergenic-intronic
chr5	17079874	17079875	chr5	17145099	17145100	promoter-intronic
chr10	61442739	61442740	chr10	61595744	61595745	promoter-promoter
chr11	74952959	74952960	chr11	74860764	74860765	intronic-intronic
chr11	36999002	36999003	chr11	36262205	36262206	intergenic-intronic
chr12	81030867	81030868	chr12	80987560	80987561	intergenic-intergenic
chr10	66560136	66560137	chr10	66488338	66488339	promoter-intronic
chr8	18924665	18924666	chr8	18692665	18692666	intergenic-intronic
chr13	64465808	64465809	chr13	64533490	64533491	intronic-promoter
chr10	107872636	107872637	chr10	108534078	108534079	intergenic-intergenic
chr9	103663286	103663287	chr9	103549200	103549201	promoter-intronic
chr6	50062999	50063000	chr6	50244180	50244181	intronic-exonic
chr16	13160457	13160458	chr16	13452073	13452074	intergenic-intergenic
chr4	152858640	152858641	chr4	151986251	151986252	intergenic-intergenic
chr16	11469242	11469243	chr16	11659272	11659273	intronic-intronic
chr10	10041134	10041135	chr10	9620421	9620422	intergenic-promoter
chr11	24114521	24114522	chr11	24515209	24515210	intergenic-intergenic
chr14	64164656	64164657	chr14	64378735	64378736	intergenic-intronic
chr15	51509171	51509172	chr15	50521471	50521472	intergenic-intronic
chr8	87078500	87078501	chr8	86806757	86806758	intronic-intergenic
chr10	122229500	122229501	chr10	122136384	122136385	intronic-intronic
chr10	79813142	79813143	chr10	79836696	79836697	intergenic-intergenic
chr7	107429032	107429033	chr7	108250915	108250916	intergenic-intergenic
chr10	120158174	120158175	chr10	120231301	120231302	intergenic-intronic
chr10	44606973	44606974	chr10	44682187	44682188	intergenic-intergenic
chr16	30977720	30977721	chr16	31070521	31070522	intronic-intronic
chr18	61807603	61807604	chr18	61819085	61819086	promoter-intronic
chr14	56922545	56922546	chr14	56226863	56226864	intergenic-exonic
chr4	117508407	117508408	chr4	117964070	117964071	promoter-promoter
chr7	29231885	29231886	chr7	29386189	29386190	exonic-intergenic
chr18	55930021	55930022	chr18	56208299	56208300	intergenic-intergenic
chr4	135357645	135357646	chr4	135476483	135476484	exonic-promoter
chr13	51887922	51887923	chr13	51825310	51825311	intronic-intronic
chr12	81871419	81871420	chr12	82841469	82841470	intergenic-intronic
chr6	114921203	114921204	chr6	114957985	114957986	intergenic-intronic
chr4	33235020	33235021	chr4	33291738	33291739	intronic-intergenic
chr12	70261017	70261018	chr12	70072878	70072879	promoter-intergenic
chr7	17213607	17213608	chr7	17314184	17314185	intergenic-intergenic
chr19	44320596	44320597	chr19	44438210	44438211	intergenic-intergenic
chr9	71494175	71494176	chr9	71620498	71620499	intronic-intergenic
chr11	76066814	76066815	chr11	76212707	76212708	intergenic-promoter
chr10	126950112	126950113	chr10	126974455	126974456	intergenic-intergenic
chr2	173055377	173055378	chr2	173372018	173372019	intronic-intergenic
chr5	124698764	124698765	chr5	124583871	124583872	intergenic-intronic
chr4	131472385	131472386	chr4	131708424	131708425	promoter-intergenic
chr1	169150917	169150918	chr1	169267692	169267693	intergenic-intergenic
chr5	117966914	117966915	chr5	118286712	118286713	intronic-intergenic
chr11	96963282	96963283	chr11	96970603	96970604	exonic-intronic
chr8	47237626	47237627	chr8	47079694	47079695	intergenic-intronic
chr17	30023932	30023933	chr17	30054021	30054022	promoter-intergenic
chr9	69138460	69138461	chr9	68916420	68916421	promoter-intronic
chr7	124526134	124526135	chr7	124242530	124242531	intronic-intergenic
chr16	44485494	44485495	chr16	44630799	44630800	exonic-intergenic
chr2	161040725	161040726	chr2	161217887	161217888	intergenic-intergenic
chr4	82188321	82188322	chr4	81221763	81221764	intergenic-intergenic
chr19	26822608	26822609	chr19	27047660	27047661	promoter-intergenic
chr3	40886815	40886816	chr3	41547769	41547770	promoter-promoter
chr6	115218240	115218241	chr6	114893123	114893124	intronic-intronic
chr17	5331682	5331683	chr17	5402208	5402209	intronic-intergenic
chr5	75337647	75337648	chr5	75552330	75552331	intergenic-promoter
chr11	82728799	82728800	chr11	83005370	83005371	intronic-promoter
chr5	41948221	41948222	chr5	42563584	42563585	intergenic-intergenic
chr15	83394002	83394003	chr15	83414919	83414920	promoter-intronic
chr9	60566318	60566319	chr9	60514905	60514906	intronic-intronic
chr9	72614616	72614617	chr9	72731959	72731960	intergenic-intronic
chr9	78375930	78375931	chr9	78435646	78435647	intergenic-promoter
chr15	12178403	12178404	chr15	12133380	12133381	intronic-intergenic
chr9	74134773	74134774	chr9	74324921	74324922	intergenic-intergenic
chr10	80391403	80391404	chr10	80454571	80454572	intergenic-intronic
chr2	16277314	16277315	chr2	16057516	16057517	promoter-intergenic
chr3	157197938	157197939	chr3	157380683	157380684	promoter-intergenic
chr1	88075562	88075563	chr1	88200381	88200382	intronic-promoter
chr16	38902311	38902312	chr16	39030984	39030985	promoter-intergenic
chr6	142912517	142912518	chr6	142895724	142895725	promoter-intronic
chr4	100448666	100448667	chr4	100539703	100539704	promoter-intronic
chr15	59220691	59220692	chr15	59481472	59481473	intronic-intronic
chr7	87533298	87533299	chr7	87874545	87874546	promoter-intronic
chr7	87516233	87516234	chr7	87468920	87468921	promoter-promoter
chr1	94730723	94730724	chr1	94663725	94663726	intronic-intergenic
chr5	31218180	31218181	chr5	31138742	31138743	intronic-intronic
chr1	38451796	38451797	chr1	38711342	38711343	intronic-intronic
chr2	165981352	165981353	chr2	166384381	166384382	promoter-intergenic
chr16	20716540	20716541	chr16	20804736	20804737	promoter-intergenic
chr19	33029045	33029046	chr19	32798546	32798547	intergenic-intergenic
chr3	52845738	52845739	chr3	53196041	53196042	promoter-intergenic
chr5	33786226	33786227	chr5	33739717	33739718	intergenic-intronic
chr12	71597744	71597745	chr12	71999655	71999656	intergenic-intronic
chr9	108147430	108147431	chr9	108125403	108125404	intronic-intronic
chr3	83077977	83077978	chr3	82940627	82940628	intergenic-intergenic
chr3	121806958	121806959	chr3	121757489	121757490	intronic-intronic
chr6	56016824	56016825	chr6	56641444	56641445	intergenic-intergenic
chr9	81529063	81529064	chr9	81516527	81516528	intronic-intergenic
chr5	31522414	31522415	chr5	31504825	31504826	promoter-promoter
chr4	147660770	147660771	chr4	147810699	147810700	intronic-exonic
chr15	57709559	57709560	chr15	57665403	57665404	intronic-intronic
chr19	54018369	54018370	chr19	53676219	53676220	promoter-intronic
chr12	113644472	113644473	chr12	113650171	113650172	promoter-exonic
chr2	118304832	118304833	chr2	118359032	118359033	promoter-intronic
chr5	33736632	33736633	chr5	33785710	33785711	intronic-intergenic
chr2	95072579	95072580	chr2	94410584	94410585	intergenic-intergenic
chr10	114243229	114243230	chr10	114270848	114270849	intergenic-intergenic
chr11	63478884	63478885	chr11	62544169	62544170	intergenic-intronic
chr12	86688578	86688579	chr12	87265217	87265218	intronic-intronic
chr18	69681377	69681378	chr18	69506898	69506899	intronic-promoter
chr14	76477182	76477183	chr14	76415899	76415900	intergenic-intergenic
chr11	63504706	63504707	chr11	63357025	63357026	intergenic-intergenic
chr11	85740272	85740273	chr11	84771843	84771844	intergenic-promoter
chr11	57458195	57458196	chr11	57502465	57502466	promoter-intronic
chr19	56015781	56015782	chr19	55485436	55485437	intergenic-intronic
chr7	150080689	150080690	chr7	150105368	150105369	intronic-intergenic
chr5	114698136	114698137	chr5	114755796	114755797	intronic-intergenic
chr17	31992966	31992967	chr17	32161617	32161618	promoter-intronic
chr12	4484351	4484352	chr12	4217827	4217828	promoter-intronic
chr10	59881148	59881149	chr10	60150016	60150017	intronic-intronic
chr1	93295187	93295188	chr1	93303673	93303674	promoter-intergenic
chr13	60704357	60704358	chr13	60152037	60152038	promoter-intergenic
chr8	123494539	123494540	chr8	123615294	123615295	intergenic-intergenic
chr2	169978935	169978936	chr2	170093692	170093693	intergenic-intergenic
chr15	98918914	98918915	chr15	98929621	98929622	promoter-promoter
chr5	104762413	104762414	chr5	104889446	104889447	intronic-promoter
chr13	96547306	96547307	chr13	96661510	96661511	intronic-promoter
chr8	74889316	74889317	chr8	74814410	74814411	intronic-intergenic
chr11	62735259	62735260	chr11	63276736	63276737	promoter-intergenic
chr9	96473840	96473841	chr9	96397740	96397741	intronic-intergenic
chr3	104246192	104246193	chr3	103909206	103909207	intergenic-intronic
chr5	100928866	100928867	chr5	100858868	100858869	promoter-promoter
chr9	118939121	118939122	chr9	118977111	118977112	intronic-promoter
chr8	94881713	94881714	chr8	94887689	94887690	promoter-intergenic
chr2	132777673	132777674	chr2	132816470	132816471	intergenic-intergenic
chr3	87875982	87875983	chr3	87816546	87816547	promoter-intergenic
chr11	102854872	102854873	chr11	102588976	102588977	intergenic-intergenic
chr5	77783891	77783892	chr5	77836773	77836774	intronic-promoter
chr17	33576365	33576366	chr17	33676075	33676076	intergenic-intronic
chr19	5050370	5050371	chr19	5073088	5073089	promoter-intergenic
chr2	129419162	129419163	chr2	129332155	129332156	promoter-intronic
chr11	99326180	99326181	chr11	100223670	100223671	intergenic-intergenic
chr5	106630165	106630166	chr5	106549581	106549582	intergenic-intergenic
chr3	52779549	52779550	chr3	52399120	52399121	intergenic-intergenic
chr8	85784585	85784586	chr8	85873617	85873618	intronic-intronic
chr1	75215849	75215850	chr1	74936217	74936218	promoter-intergenic
chr5	127992205	127992206	chr5	127672368	127672369	intronic-intergenic
chr8	13413356	13413357	chr8	13462478	13462479	intronic-intergenic
chr5	117715076	117715077	chr5	117571829	117571830	intronic-intronic
chr10	17930889	17930890	chr10	18248398	18248399	promoter-intronic
chr15	83565153	83565154	chr15	83580728	83580729	intergenic-intergenic
chr4	83571299	83571300	chr4	83522700	83522701	intergenic-intergenic
chr17	50649128	50649129	chr17	50935062	50935063	promoter-intronic
chr1	157933245	157933246	chr1	158172102	158172103	intronic-intergenic
chr3	107670260	107670261	chr3	107865916	107865917	intergenic-intergenic
chr4	107376759	107376760	chr4	107130848	107130849	intergenic-intronic
chr10	124703014	124703015	chr10	124675038	124675039	intronic-intronic
chr5	31108823	31108824	chr5	31209873	31209874	intergenic-promoter
chr15	38639936	38639937	chr15	38742539	38742540	intergenic-intergenic
chr16	10280952	10280953	chr16	10475380	10475381	intergenic-intergenic
chr5	115274211	115274212	chr5	115228837	115228838	promoter-intronic
chr3	90216785	90216786	chr3	90281246	90281247	intronic-exonic
chr13	104853177	104853178	chr13	104872507	104872508	intronic-intronic
chr18	61107129	61107130	chr18	61141731	61141732	intronic-intronic
chr7	38846914	38846915	chr7	38925184	38925185	intergenic-intergenic
chr19	53469235	53469236	chr19	53653508	53653509	intergenic-intergenic
chr2	75802268	75802269	chr2	75706632	75706633	intergenic-intronic
chr7	72464346	72464347	chr7	72559449	72559450	intronic-intergenic
chr5	118452579	118452580	chr5	117961822	117961823	intronic-intronic
chr10	60159728	60159729	chr10	59798575	59798576	promoter-intronic
chr13	98979136	98979137	chr13	99010391	99010392	intergenic-intergenic
chr5	131484731	131484732	chr5	131418311	131418312	intronic-intronic
chr7	134904682	134904683	chr7	134704381	134704382	intronic-promoter
chr4	101899501	101899502	chr4	102329328	102329329	intronic-intergenic
chr11	101185044	101185045	chr11	101256545	101256546	intergenic-intergenic
chr11	96164729	96164730	chr11	96503611	96503612	promoter-intronic
chr11	20101853	20101854	chr11	20039821	20039822	promoter-intergenic
chr2	25365801	25365802	chr2	25568605	25568606	intergenic-intergenic
chr4	22898709	22898710	chr4	22704767	22704768	intergenic-intergenic
chr13	28782776	28782777	chr13	28507296	28507297	intronic-intergenic
chr17	45872640	45872641	chr17	46309897	46309898	intergenic-exonic
chr6	100832733	100832734	chr6	101145003	101145004	intergenic-intronic
chr11	94201649	94201650	chr11	94266276	94266277	exonic-intergenic
chr16	96906467	96906468	chr16	96972871	96972872	intronic-intronic
chr14	65568177	65568178	chr14	65287127	65287128	promoter-intronic
chr11	77640949	77640950	chr11	77707746	77707747	intronic-promoter
chr1	77975353	77975354	chr1	77819706	77819707	intergenic-intergenic
chr17	32487695	32487696	chr17	32534031	32534032	promoter-intronic
chr18	75875716	75875717	chr18	75747635	75747636	intergenic-intronic
chr15	36635638	36635639	chr15	36591271	36591272	intergenic-intergenic
chr6	97690476	97690477	chr6	97467511	97467512	intergenic-intronic
chr9	116299565	116299566	chr9	116333952	116333953	intergenic-intergenic
chr1	127332375	127332376	chr1	127277606	127277607	promoter-intergenic
chr11	88352694	88352695	chr11	88543821	88543822	intronic-intronic
chr18	80905585	80905586	chr18	80723860	80723861	promoter-intergenic
chr11	88243257	88243258	chr11	88764124	88764125	intronic-intergenic
chr1	93770583	93770584	chr1	93498899	93498900	intergenic-intergenic
chr16	40739244	40739245	chr16	40754938	40754939	intronic-intronic
chr7	35597910	35597911	chr7	36050045	36050046	promoter-intergenic
chr3	116210853	116210854	chr3	116542846	116542847	promoter-intergenic
chr8	124893814	124893815	chr8	124795114	124795115	intergenic-intergenic
chr12	110132694	110132695	chr12	110278661	110278662	promoter-intronic
chr3	146916911	146916912	chr3	146761747	146761748	intergenic-intergenic
chr2	29587398	29587399	chr2	29570947	29570948	intronic-intronic
chr11	52335494	52335495	chr11	52379976	52379977	intergenic-intergenic
chr8	95408360	95408361	chr8	95352221	95352222	intronic-promoter
chr16	4542050	4542051	chr16	4488314	4488315	intergenic-intronic
chr1	164243207	164243208	chr1	163970068	163970069	intronic-intronic
chr1	156854293	156854294	chr1	156930425	156930426	intergenic-promoter
chr11	97856124	97856125	chr11	97927499	97927500	intronic-intergenic
chr9	21948064	21948065	chr9	21924391	21924392	intergenic-intronic
chr13	64350269	64350270	chr13	64413757	64413758	promoter-promoter
chr14	52628741	52628742	chr14	52605537	52605538	exonic-intronic
chr6	91362041	91362042	chr6	91237812	91237813	promoter-intergenic
chr7	108599634	108599635	chr7	108654136	108654137	promoter-intronic
chr9	116299001	116299002	chr9	116161674	116161675	intergenic-intergenic
chr17	30884025	30884026	chr17	31085700	31085701	intronic-intronic
chr13	59113035	59113036	chr13	58949910	58949911	intronic-intronic
chr1	136852416	136852417	chr1	136846692	136846693	promoter-intronic
chr3	104561565	104561566	chr3	104583155	104583156	intergenic-promoter
chr4	59373735	59373736	chr4	59472251	59472252	intronic-intergenic
chr8	106671222	106671223	chr8	106743760	106743761	intergenic-intergenic
chr11	85457060	85457061	chr11	85493808	85493809	intronic-intronic
chr8	34709815	34709816	chr8	34753019	34753020	promoter-promoter
chr7	106807948	106807949	chr7	106946872	106946873	exonic-intergenic
chr2	128774632	128774633	chr2	128861143	128861144	intergenic-intergenic
chr5	111846431	111846432	chr5	111962486	111962487	promoter-intergenic
chr11	120350652	120350653	chr11	120441193	120441194	intergenic-intronic
chr13	55072338	55072339	chr13	55037772	55037773	intronic-intergenic
chr13	114111996	114111997	chr13	114589281	114589282	intergenic-intronic
chr13	29949607	29949608	chr13	30152958	30152959	intergenic-intergenic
chr1	75339668	75339669	chr1	75378515	75378516	intergenic-promoter
chr4	154317887	154317888	chr4	154340605	154340606	intergenic-intronic
chr1	91351659	91351660	chr1	91722846	91722847	promoter-intronic
chr7	103681819	103681820	chr7	103689290	103689291	intronic-intronic
chr2	164417735	164417736	chr2	164291657	164291658	intronic-exonic
chr9	42752518	42752519	chr9	42115827	42115828	promoter-intergenic
chr10	115767720	115767721	chr10	116285895	116285896	intronic-intronic
chr19	4908515	4908516	chr19	4929764	4929765	intronic-intergenic
chr13	59957807	59957808	chr13	60580090	60580091	intergenic-intergenic
chr9	104471918	104471919	chr9	104535740	104535741	promoter-intronic
chr12	4107513	4107514	chr12	4484257	4484258	exonic-promoter
chr7	31121575	31121576	chr7	31251070	31251071	intergenic-promoter
chr13	18035676	18035677	chr13	17971104	17971105	promoter-intergenic
chr5	64158187	64158188	chr5	63974399	63974400	intronic-intergenic
chr6	49469291	49469292	chr6	49869697	49869698	intergenic-intergenic
chr9	47339434	47339435	chr9	47233500	47233501	intronic-intergenic
chr14	70133706	70133707	chr14	70167989	70167990	intronic-promoter
chr2	172582524	172582525	chr2	172464750	172464751	intergenic-intergenic
chr11	59592231	59592232	chr11	59890377	59890378	exonic-intergenic
chr9	41389262	41389263	chr9	41642373	41642374	promoter-intergenic
chr5	104875438	104875439	chr5	104725439	104725440	intergenic-intergenic
chr7	91595611	91595612	chr7	91742954	91742955	intergenic-intronic
chr13	55638111	55638112	chr13	55671935	55671936	promoter-promoter
chr6	119170103	119170104	chr6	119230424	119230425	exonic-intronic
chr4	64783781	64783782	chr4	65115720	65115721	intergenic-intronic
chr4	117048361	117048362	chr4	117168530	117168531	promoter-promoter
chr13	64534499	64534500	chr13	64540580	64540581	promoter-exonic
chr10	39182656	39182657	chr10	39297609	39297610	intronic-intergenic
chr16	79168605	79168606	chr16	79064259	79064260	intergenic-intronic
chr16	90624361	90624362	chr16	90596250	90596251	intergenic-intergenic
chr17	3114904	3114905	chr17	3181404	3181405	promoter-intronic
chr18	34666266	34666267	chr18	34783730	34783731	promoter-promoter
chr10	61246822	61246823	chr10	61300789	61300790	promoter-intergenic
chr11	120575215	120575216	chr11	120379775	120379776	promoter-intergenic
chr19	4755777	4755778	chr19	4760798	4760799	promoter-intronic
chr11	95245884	95245885	chr11	95383021	95383022	promoter-intergenic
chr8	27978810	27978811	chr8	27664970	27664971	intergenic-intergenic
chr4	154340725	154340726	chr4	154247661	154247662	intronic-intronic
chr19	59528570	59528571	chr19	59512762	59512763	intronic-intronic
chr4	84002209	84002210	chr4	84010357	84010358	intronic-intronic
chr14	27996393	27996394	chr14	27847855	27847856	intronic-intergenic
chr19	55737042	55737043	chr19	55695293	55695294	intergenic-intronic
chr11	105505518	105505519	chr11	105195456	105195457	intronic-intronic
chr7	150339857	150339858	chr7	150652629	150652630	intronic-intergenic
chr2	151574420	151574421	chr2	151442890	151442891	exonic-intronic
chr3	99407133	99407134	chr3	99199900	99199901	intergenic-intergenic
chr4	43492262	43492263	chr4	43044330	43044331	intergenic-promoter
chr19	5056431	5056432	chr19	4320713	4320714	exonic-intronic
chr8	33997124	33997125	chr8	33325019	33325020	intergenic-intergenic
chr4	114078416	114078417	chr4	114168719	114168720	promoter-intronic
chr11	26110187	26110188	chr11	26136268	26136269	promoter-intergenic
chr13	34437202	34437203	chr13	34764863	34764864	promoter-intergenic
chr13	74478710	74478711	chr13	74700385	74700386	intronic-intergenic
chr7	116283195	116283196	chr7	116298815	116298816	intronic-intronic
chr16	5013652	5013653	chr16	5145900	5145901	promoter-intergenic
chr2	28440824	28440825	chr2	28488764	28488765	intergenic-intergenic
chr10	94407313	94407314	chr10	93834945	93834946	promoter-intronic
chr1	57029997	57029998	chr1	56736890	56736891	intronic-intergenic
chr2	25561869	25561870	chr2	25880836	25880837	promoter-intergenic
chr8	94323723	94323724	chr8	94346875	94346876	exonic-intergenic
chr9	45398883	45398884	chr9	44985633	44985634	intronic-intronic
chr14	32768437	32768438	chr14	32841869	32841870	intergenic-promoter
chr11	118836929	118836930	chr11	118884053	118884054	intergenic-promoter
chr10	79388211	79388212	chr10	79576817	79576818	intergenic-intergenic
chr2	92909356	92909357	chr2	93311303	93311304	intergenic-intergenic
chr12	77298024	77298025	chr12	77440753	77440754	intergenic-intergenic
chr14	76998653	76998654	chr14	76888612	76888613	intergenic-promoter
chr1	182199207	182199208	chr1	182246318	182246319	intergenic-intergenic
chr11	55805304	55805305	chr11	55667747	55667748	intergenic-intergenic
chr13	31174691	31174692	chr13	31748041	31748042	intergenic-intergenic
chr9	35171072	35171073	chr9	34748073	34748074	intergenic-intronic
chr19	47242964	47242965	chr19	47248505	47248506	intergenic-intergenic
chr6	114295443	114295444	chr6	114674161	114674162	intergenic-intronic
chr9	29559265	29559266	chr9	30072512	30072513	intronic-intergenic
chr2	180922503	180922504	chr2	180476985	180476986	promoter-intergenic
chr9	43135544	43135545	chr9	43123574	43123575	intronic-intronic
chr10	96085577	96085578	chr10	96397212	96397213	intergenic-intergenic
chr8	73122404	73122405	chr8	72894419	72894420	intronic-intergenic
chr7	149256912	149256913	chr7	149320614	149320615	intergenic-intergenic
chr7	17202552	17202553	chr7	17111586	17111587	intergenic-intronic
chr9	66767228	66767229	chr9	66313638	66313639	promoter-intronic
chr3	51287855	51287856	chr3	51497675	51497676	promoter-intronic
chr17	26205701	26205702	chr17	26169037	26169038	promoter-intronic
chr2	92743898	92743899	chr2	92760189	92760190	intergenic-intronic
chr16	10447663	10447664	chr16	10520081	10520082	promoter-intronic
chr3	141553661	141553662	chr3	141692795	141692796	intronic-intronic
chr12	102267671	102267672	chr12	102176113	102176114	promoter-exonic
chr5	137438707	137438708	chr5	137501186	137501187	promoter-intergenic
chr6	127717900	127717901	chr6	127873597	127873598	promoter-exonic
chr6	52206576	52206577	chr6	52529514	52529515	intergenic-intronic
chr15	74366454	74366455	chr15	73824178	73824179	intronic-intergenic
chr10	76197851	76197852	chr10	76972391	76972392	intergenic-intronic
chr1	155742729	155742730	chr1	155965611	155965612	intronic-promoter
chr4	130809137	130809138	chr4	130861988	130861989	intergenic-intergenic
chr4	43039165	43039166	chr4	43054426	43054427	promoter-intronic
chr12	83687826	83687827	chr12	83983143	83983144	intergenic-intronic
chr9	44942185	44942186	chr9	44776218	44776219	intronic-intergenic
chr9	40852983	40852984	chr9	40993669	40993670	intronic-intergenic
chr1	137437100	137437101	chr1	137394515	137394516	intronic-intronic
chr19	5727574	5727575	chr19	5298131	5298132	intergenic-promoter
chr14	122319150	122319151	chr14	122122155	122122156	intronic-intronic
chr7	88908214	88908215	chr7	89071991	89071992	promoter-intronic
chr2	164278533	164278534	chr2	163740475	163740476	intergenic-intronic
chr16	35056559	35056560	chr16	35106150	35106151	intronic-intronic
chr6	28782615	28782616	chr6	28723570	28723571	promoter-intronic
chr4	96704644	96704645	chr4	97221170	97221171	intergenic-intergenic
chr2	103584045	103584046	chr2	103403157	103403158	intronic-intergenic
chr2	166391196	166391197	chr2	166176821	166176822	intergenic-intergenic
chr2	131005943	131005944	chr2	131036102	131036103	promoter-promoter
chr4	148282558	148282559	chr4	148478324	148478325	intronic-promoter
chr8	49639959	49639960	chr8	49521398	49521399	promoter-intronic
chr10	61301605	61301606	chr10	61345704	61345705	intronic-intronic
chr19	57729797	57729798	chr19	58702405	58702406	intronic-intergenic
chr4	106512753	106512754	chr4	106581861	106581862	intergenic-intergenic
chr2	104285077	104285078	chr2	104524320	104524321	intronic-exonic
chr11	51103241	51103242	chr11	51346918	51346919	promoter-intronic
chr2	119022315	119022316	chr2	119012693	119012694	intronic-intronic
chr13	93520949	93520950	chr13	93898561	93898562	intergenic-intronic
chr16	95827285	95827286	chr16	95994904	95994905	intergenic-intergenic
chr6	100879900	100879901	chr6	101043144	101043145	intergenic-intergenic
chr7	30149249	30149250	chr7	29828685	29828686	exonic-intronic
chr5	144308429	144308430	chr5	144273883	144273884	intergenic-intronic
chr2	52866197	52866198	chr2	52980663	52980664	intronic-intronic
chr4	119590563	119590564	chr4	119904640	119904641	intronic-intergenic
chr5	119231661	119231662	chr5	119264399	119264400	intergenic-intergenic
chr16	18443644	18443645	chr16	18548497	18548498	intronic-intronic
chr19	6999272	6999273	chr19	7114450	7114451	promoter-promoter
chr9	49297078	49297079	chr9	48885849	48885850	intergenic-intronic
chr2	93315325	93315326	chr2	93487350	93487351	intergenic-intronic
chr4	62876901	62876902	chr4	62956895	62956896	promoter-intronic
chr11	35666398	35666399	chr11	35814964	35814965	intronic-intergenic
chr11	55384861	55384862	chr11	55515713	55515714	intronic-intergenic
chr5	104246913	104246914	chr5	104041526	104041527	intronic-exonic
chr19	28527406	28527407	chr19	28586974	28586975	intronic-intronic
chr6	72166649	72166650	chr6	72617188	72617189	intronic-intronic
chr5	37227281	37227282	chr5	37337978	37337979	intergenic-intronic
chr11	33621408	33621409	chr11	33473970	33473971	intronic-intronic
chr17	23707898	23707899	chr17	23836321	23836322	intergenic-intergenic
chr14	24951809	24951810	chr14	24392691	24392692	intergenic-intronic
chr11	114489446	114489447	chr11	114351469	114351470	intergenic-intergenic
chr11	57600972	57600973	chr11	57343360	57343361	exonic-exonic
chr12	86680349	86680350	chr12	86486560	86486561	promoter-intronic
chr1	194610488	194610489	chr1	195303226	195303227	intergenic-intergenic
chr11	94266645	94266646	chr11	94295102	94295103	intergenic-exonic
chr6	37392106	37392107	chr6	37377069	37377070	promoter-intronic
chr14	67665878	67665879	chr14	67830763	67830764	intronic-intergenic
chr10	59414487	59414488	chr10	59434907	59434908	promoter-intergenic
chr16	30602323	30602324	chr16	30872232	30872233	exonic-intergenic
chr10	110663636	110663637	chr10	111362386	111362387	intronic-intergenic
chr15	101804471	101804472	chr15	101760615	101760616	intergenic-exonic
chr9	61209561	61209562	chr9	61129280	61129281	intergenic-intergenic
chr12	113239621	113239622	chr12	113127743	113127744	intronic-intronic
chr7	30168334	30168335	chr7	30274653	30274654	exonic-intronic
chr8	129363665	129363666	chr8	129217176	129217177	intronic-intergenic
chr2	159412801	159412802	chr2	160193445	160193446	intergenic-promoter
chr6	88395344	88395345	chr6	88357253	88357254	intronic-intronic
chr11	35261746	35261747	chr11	34857210	34857211	intronic-intergenic
chr2	157461893	157461894	chr2	157749370	157749371	intergenic-intronic
chr8	72758333	72758334	chr8	72736167	72736168	promoter-promoter
chr1	61359284	61359285	chr1	61215607	61215608	intergenic-intergenic
chr10	80122190	80122191	chr10	80139571	80139572	intergenic-promoter
chr7	139418695	139418696	chr7	139567275	139567276	intergenic-intergenic
chr11	105938202	105938203	chr11	105826189	105826190	intergenic-intergenic
chr4	132595476	132595477	chr4	132582953	132582954	intronic-intronic
chr4	139814881	139814882	chr4	139929138	139929139	intergenic-intergenic
chr12	5380803	5380804	chr12	6093207	6093208	intronic-intergenic
chr6	145191022	145191023	chr6	145290627	145290628	intronic-intergenic
chr5	145749820	145749821	chr5	145576601	145576602	intronic-intronic
chr4	124628044	124628045	chr4	124657303	124657304	intergenic-intergenic
chr11	66899065	66899066	chr11	66844437	66844438	intronic-intronic
chr6	53114591	53114592	chr6	53037917	53037918	intergenic-intergenic
chr19	58072749	58072750	chr19	58194606	58194607	intronic-intronic
chr4	85922773	85922774	chr4	85871583	85871584	promoter-intronic
chr2	136311803	136311804	chr2	136809997	136809998	intergenic-intronic
chr17	31156675	31156676	chr17	31217044	31217045	intergenic-intronic
chr8	125203113	125203114	chr8	125193690	125193691	intronic-intronic
chr10	17052654	17052655	chr10	16418192	16418193	intergenic-intergenic
chr10	120953491	120953492	chr10	120947333	120947334	intergenic-intergenic
chr6	60994525	60994526	chr6	61262017	61262018	intergenic-exonic
chr3	52205467	52205468	chr3	52926979	52926980	intergenic-intronic
chr6	8780717	8780718	chr6	8868771	8868772	intergenic-intergenic
chr6	99403059	99403060	chr6	99221743	99221744	intronic-intronic
chr17	3325895	3325896	chr17	3446586	3446587	promoter-intronic
chr11	95688941	95688942	chr11	95639561	95639562	intronic-intronic
chr6	124917542	124917543	chr6	124934365	124934366	intergenic-intergenic
chr3	29711918	29711919	chr3	29898104	29898105	intergenic-intronic
chr11	35264718	35264719	chr11	34923890	34923891	intronic-intergenic
chr17	12882674	12882675	chr17	12959852	12959853	intronic-intronic
chr14	34893526	34893527	chr14	34967772	34967773	intronic-intergenic
chr11	90179042	90179043	chr11	90096647	90096648	intergenic-intronic
chr2	28061121	28061122	chr2	28230461	28230462	promoter-intergenic
chr11	101829820	101829821	chr11	101865818	101865819	intergenic-intronic
chr2	25084134	25084135	chr2	25209095	25209096	intergenic-intronic
chr2	14217252	14217253	chr2	14588018	14588019	intronic-intronic
chr18	11997689	11997690	chr18	12084691	12084692	promoter-intronic
chr13	91788191	91788192	chr13	91946234	91946235	intronic-intronic
chr9	106270283	106270284	chr9	106323770	106323771	promoter-intergenic
chr4	119898438	119898439	chr4	120217351	120217352	intergenic-intronic
chr9	44463709	44463710	chr9	44493690	44493691	intergenic-intronic
chr4	149100262	149100263	chr4	149094028	149094029	exonic-intronic
chr6	38110315	38110316	chr6	38208311	38208312	intronic-intergenic
chr11	8760049	8760050	chr11	8516567	8516568	intronic-intronic
chr9	111399414	111399415	chr9	111568205	111568206	intergenic-intronic
chr4	149100306	149100307	chr4	149473407	149473408	exonic-intronic
chr6	136417185	136417186	chr6	136481257	136481258	intergenic-promoter
chr14	116606287	116606288	chr14	117251848	117251849	intronic-intergenic
chr5	144329011	144329012	chr5	144493037	144493038	intergenic-promoter
chr14	119318386	119318387	chr14	119347101	119347102	intronic-intronic
chrX	131264796	131264797	chrX	131448259	131448260	intergenic-intergenic
chr16	59683369	59683370	chr16	60550217	60550218	intronic-intronic
chr5	125645374	125645375	chr5	125537548	125537549	intronic-intronic
chr7	35461257	35461258	chr7	35785369	35785370	exonic-intronic
chr10	115024642	115024643	chr10	115646387	115646388	promoter-intronic
chr10	12332536	12332537	chr10	11725581	11725582	intronic-intergenic
chr10	119047651	119047652	chr10	119097710	119097711	intronic-intronic
chr10	119083752	119083753	chr10	119241162	119241163	intronic-intronic
chr10	119670932	119670933	chr10	119106461	119106462	intergenic-intronic
chr10	119501752	119501753	chr10	119367272	119367273	intronic-intronic
chr10	119639423	119639424	chr10	119550495	119550496	promoter-promoter
chr10	119684684	119684685	chr10	119709897	119709898	intergenic-intergenic
chr10	120147793	120147794	chr10	120105271	120105272	intergenic-intergenic
chr10	120294785	120294786	chr10	120142041	120142042	intronic-intergenic
chr10	120309796	120309797	chr10	120517473	120517474	intronic-intronic
chr10	120846913	120846914	chr10	120937262	120937263	intergenic-intergenic
chr10	122421696	122421697	chr10	122310298	122310299	intergenic-intronic
chr10	122417597	122417598	chr10	122975676	122975677	intergenic-intronic
chr10	125222104	125222105	chr10	125164032	125164033	intergenic-intergenic
chr10	126950159	126950160	chr10	126963752	126963753	intergenic-exonic
chr10	127986169	127986170	chr10	127930843	127930844	promoter-promoter
chr10	17441842	17441843	chr10	17115720	17115721	intergenic-intergenic
chr10	19868708	19868709	chr10	19890377	19890378	promoter-promoter
chr10	19890509	19890510	chr10	20004051	20004052	promoter-intronic
chr10	20081606	20081607	chr10	20483946	20483947	intergenic-intergenic
chr10	20685900	20685901	chr10	20812436	20812437	intronic-intergenic
chr10	21140976	21140977	chr10	21174597	21174598	intronic-intergenic
chr10	22434462	22434463	chr10	22337784	22337785	intronic-intergenic
chr10	23535205	23535206	chr10	23408912	23408913	intronic-intergenic
chr10	37357106	37357107	chr10	38265585	38265586	intergenic-intergenic
chr10	39333134	39333135	chr10	39237847	39237848	promoter-intronic
chr10	39932374	39932375	chr10	39247315	39247316	intergenic-intronic
chr10	39531608	39531609	chr10	39577283	39577284	intronic-intronic
chr10	41239860	41239861	chr10	41402871	41402872	promoter-intergenic
chr10	43299469	43299470	chr10	43638964	43638965	promoter-intronic
chr10	56093225	56093226	chr10	56145001	56145002	intergenic-intergenic
chr10	56515527	56515528	chr10	57291286	57291287	intergenic-intergenic
chr10	5941479	5941480	chr10	6360764	6360765	intronic-intronic
chr10	60515164	60515165	chr10	59953395	59953396	intergenic-intronic
chr10	62450754	62450755	chr10	62488179	62488180	intronic-promoter
chr10	66780769	66780770	chr10	66944851	66944852	intergenic-intergenic
chr10	67268031	67268032	chr10	67205387	67205388	intergenic-intergenic
chr10	67618385	67618386	chr10	68144673	68144674	intronic-intergenic
chr10	69333097	69333098	chr10	69427949	69427950	exonic-intronic
chr10	70426693	70426694	chr10	70688875	70688876	intronic-exonic
chr10	74521976	74521977	chr10	74614716	74614717	intergenic-intronic
chr10	75098386	75098387	chr10	75177730	75177731	intergenic-intronic
chr10	75207145	75207146	chr10	75367412	75367413	intronic-intronic
chr10	75295275	75295276	chr10	75236255	75236256	exonic-promoter
chr10	75438208	75438209	chr10	75665073	75665074	intronic-intergenic
chr10	76086035	76086036	chr10	76196264	76196265	promoter-intergenic
chr10	77090387	77090388	chr10	78016353	78016354	intronic-intergenic
chr10	77858286	77858287	chr10	77747725	77747726	intergenic-intronic
chr10	79604117	79604118	chr10	79340242	79340243	promoter-intergenic
chr10	79388151	79388152	chr10	79353622	79353623	intergenic-promoter
chr10	79576979	79576980	chr10	79393671	79393672	intergenic-exonic
chr10	79422726	79422727	chr10	79446835	79446836	promoter-promoter
chr10	79708168	79708169	chr10	79641149	79641150	intergenic-intergenic
chr10	81063463	81063464	chr10	81022396	81022397	promoter-promoter
chr10	81034409	81034410	chr10	81068357	81068358	intergenic-promoter
chr10	82274691	82274692	chr10	82364346	82364347	promoter-intergenic
chr10	82339016	82339017	chr10	82319232	82319233	intronic-intronic
chr10	82682282	82682283	chr10	82447193	82447194	intergenic-intergenic
chr10	82448645	82448646	chr10	82660930	82660931	promoter-intergenic
chr10	82646631	82646632	chr10	82583352	82583353	intronic-intronic
chr10	83238863	83238864	chr10	83097858	83097859	intergenic-intronic
chr10	83281935	83281936	chr10	83900788	83900789	intergenic-intronic
chr10	83482317	83482318	chr10	83546973	83546974	intergenic-intergenic
chr10	84485574	84485575	chr10	84217164	84217165	intergenic-intergenic
chr10	84646641	84646642	chr10	85114321	85114322	intronic-intronic
chr10	84851968	84851969	chr10	85114787	85114788	intronic-intronic
chr10	85763825	85763826	chr10	85908496	85908497	promoter-intronic
chr10	90733266	90733267	chr10	90523647	90523648	intergenic-intronic
chr10	92745801	92745802	chr10	92772009	92772010	intronic-intronic
chr10	92755376	92755377	chr10	92773744	92773745	intronic-promoter
chr10	92949513	92949514	chr10	93040277	93040278	intergenic-intronic
chr10	93074325	93074326	chr10	93226197	93226198	intergenic-intergenic
chr10	93281589	93281590	chr10	93273365	93273366	intergenic-intergenic
chr10	94575341	94575342	chr10	94677381	94677382	intergenic-intronic
chr10	95013952	95013953	chr10	95358037	95358038	intronic-intergenic
chr10	95361506	95361507	chr10	95800115	95800116	intergenic-intergenic
chr10	96083498	96083499	chr10	96397724	96397725	exonic-intergenic
chr10	98727451	98727452	chr10	98638915	98638916	exonic-intronic
chr10	98731572	98731573	chr10	98761017	98761018	intergenic-promoter
chr1	10223453	10223454	chr1	10320646	10320647	promoter-intronic
chr1	108613051	108613052	chr1	108444282	108444283	intergenic-intronic
chr1	11130130	11130131	chr1	10919613	10919614	promoter-intergenic
chr11	101963737	101963738	chr11	102001877	102001878	intergenic-intergenic
chr11	102762225	102762226	chr11	102916434	102916435	intergenic-intronic
chr11	102978722	102978723	chr11	103020533	103020534	exonic-intergenic
chr11	103527915	103527916	chr11	103201992	103201993	intergenic-promoter
chr11	105224263	105224264	chr11	105773132	105773133	promoter-intronic
chr11	105225383	105225384	chr11	105449027	105449028	promoter-intergenic
chr11	106966898	106966899	chr11	107050676	107050677	intronic-promoter
chr11	107545640	107545641	chr11	107663925	107663926	intronic-intergenic
chr11	109734870	109734871	chr11	109951976	109951977	intergenic-promoter
chr11	111399052	111399053	chr11	111619576	111619577	intergenic-intergenic
chr11	111399079	111399080	chr11	111440127	111440128	intergenic-intergenic
chr11	113025299	113025300	chr11	112864151	112864152	intronic-intergenic
chr11	113488919	113488920	chr11	113586722	113586723	intronic-intronic
chr11	114384878	114384879	chr11	114402355	114402356	intergenic-intergenic
chr11	114674243	114674244	chr11	114736225	114736226	intergenic-intergenic
chr11	114944900	114944901	chr11	115015290	115015291	intergenic-promoter
chr11	115021433	115021434	chr11	115231442	115231443	intronic-intergenic
chr11	115132008	115132009	chr11	115109294	115109295	intronic-intergenic
chr11	116362868	116362869	chr11	116395699	116395700	intergenic-promoter
chr11	116416068	116416069	chr11	116453898	116453899	intronic-intergenic
chr11	117038897	117038898	chr11	116700605	116700606	intergenic-intronic
chr11	116943111	116943112	chr11	117038816	117038817	intergenic-intergenic
chr11	117128891	117128892	chr11	117194204	117194205	intronic-promoter
chr11	11720360	11720361	chr11	11873645	11873646	intronic-intronic
chr11	117246446	117246447	chr11	117570622	117570623	intergenic-intronic
chr11	117269052	117269053	chr11	117249072	117249073	intergenic-intergenic
chr11	117686099	117686100	chr11	117530828	117530829	intronic-intronic
chr11	117640903	117640904	chr11	117681463	117681464	promoter-intronic
chr11	117966275	117966276	chr11	117737485	117737486	intronic-intergenic
chr11	118131460	118131461	chr11	118080628	118080629	intronic-intronic
chr11	118987506	118987507	chr11	119403874	119403875	intergenic-exonic
chr11	119266205	119266206	chr11	119210174	119210175	intergenic-intronic
chr11	119365361	119365362	chr11	119758678	119758679	intronic-intronic
chr11	119770810	119770811	chr11	119852133	119852134	intergenic-intronic
chr11	120049897	120049898	chr11	120097597	120097598	exonic-promoter
chr11	120377197	120377198	chr11	120471013	120471014	intergenic-intergenic
chr11	16710126	16710127	chr11	16732651	16732652	intronic-intronic
chr11	20355361	20355362	chr11	20590958	20590959	intergenic-intronic
chr11	20356529	20356530	chr11	20456517	20456518	intergenic-intronic
chr1	120879914	120879915	chr1	120946316	120946317	intronic-intronic
chr1	120990449	120990450	chr1	121320448	121320449	intergenic-intergenic
chr1	121990311	121990312	chr1	121955889	121955890	intergenic-intronic
chr1	122068577	122068578	chr1	122112319	122112320	intronic-intergenic
chr11	23962036	23962037	chr11	23978202	23978203	intergenic-promoter
chr11	24147330	24147331	chr11	24242668	24242669	intergenic-intergenic
chr11	24205235	24205236	chr11	24309628	24309629	intergenic-intergenic
chr1	129355492	129355493	chr1	129262604	129262605	intronic-intronic
chr1	129576593	129576594	chr1	129417197	129417198	intergenic-intronic
chr1	132089501	132089502	chr1	131853883	131853884	intronic-intronic
chr11	33045576	33045577	chr11	32678947	32678948	intronic-intergenic
chr11	32782997	32782998	chr11	32734982	32734983	intergenic-intergenic
chr1	132949985	132949986	chr1	132836263	132836264	intergenic-promoter
chr11	3308810	3308811	chr11	3349522	3349523	promoter-intronic
chr1	134018088	134018089	chr1	134052613	134052614	exonic-intergenic
chr1	134054051	134054052	chr1	134134379	134134380	intergenic-intronic
chr11	34128937	34128938	chr11	34214777	34214778	intronic-promoter
chr11	34214743	34214744	chr11	34392056	34392057	promoter-intronic
chr1	134252572	134252573	chr1	134230319	134230320	intergenic-intergenic
chr1	134668316	134668317	chr1	134408589	134408590	intergenic-exonic
chr1	134936490	134936491	chr1	135042561	135042562	intergenic-intergenic
chr11	35181324	35181325	chr11	35221133	35221134	intronic-intronic
chr11	35229421	35229422	chr11	35452932	35452933	intronic-intronic
chr1	135629110	135629111	chr1	135792117	135792118	intronic-intergenic
chr1	136019032	136019033	chr1	135805091	135805092	intronic-promoter
chr1	135949930	135949931	chr1	136003436	136003437	intergenic-intergenic
chr1	137006778	137006779	chr1	136868406	136868407	intronic-intronic
chr1	137002626	137002627	chr1	136888630	136888631	promoter-intronic
chr11	3814598	3814599	chr11	3702274	3702275	promoter-intronic
chr1	137436997	137436998	chr1	137349780	137349781	intronic-exonic
chr1	137357868	137357869	chr1	137436919	137436920	intronic-intronic
chr1	137441531	137441532	chr1	137385312	137385313	intronic-intronic
chr1	137476341	137476342	chr1	137461227	137461228	intronic-intronic
chr1	137762276	137762277	chr1	137841466	137841467	intergenic-intergenic
chr1	138012848	138012849	chr1	138170223	138170224	intronic-intronic
chr1	138356057	138356058	chr1	138362185	138362186	intergenic-intergenic
chr1	140515784	140515785	chr1	140505199	140505200	promoter-intronic
chr11	4119568	4119569	chr11	4158954	4158955	intronic-intronic
chr1	14556927	14556928	chr1	14258785	14258786	intergenic-intronic
chr11	44433749	44433750	chr11	44820853	44820854	intronic-intergenic
chr1	145549901	145549902	chr1	145624590	145624591	promoter-promoter
chr11	45696868	45696869	chr11	45622314	45622315	promoter-promoter
chr11	45830101	45830102	chr11	46025656	46025657	intronic-intronic
chr11	4721653	4721654	chr11	4641903	4641904	intronic-intronic
chr11	50417013	50417014	chr11	50423537	50423538	promoter-intronic
chr11	50582726	50582727	chr11	50867808	50867809	intronic-intergenic
chr11	52960092	52960093	chr11	52897060	52897061	intronic-intronic
chr1	153667808	153667809	chr1	153732851	153732852	exonic-exonic
chr11	53958178	53958179	chr11	53969473	53969474	intergenic-intergenic
chr11	54070672	54070673	chr11	54292586	54292587	intergenic-intronic
chr1	154939533	154939534	chr1	155092899	155092900	intronic-intronic
chr11	55200107	55200108	chr11	55127937	55127938	intergenic-intergenic
chr1	155404253	155404254	chr1	155514372	155514373	intergenic-intronic
chr11	57586844	57586845	chr11	57631796	57631797	intronic-intergenic
chr11	57633744	57633745	chr11	57731639	57731640	intergenic-intergenic
chr1	158563308	158563309	chr1	158449469	158449470	exonic-intergenic
chr11	59180288	59180289	chr11	59125091	59125092	intergenic-intronic
chr1	159482931	159482932	chr1	159720135	159720136	intronic-intergenic
chr1	160122506	160122507	chr1	159688075	159688076	intergenic-intergenic
chr1	16095921	16095922	chr1	16089309	16089310	promoter-intergenic
chr11	60988580	60988581	chr11	61318799	61318800	promoter-promoter
chr11	61479554	61479555	chr11	61593551	61593552	intronic-intronic
chr1	162161165	162161166	chr1	162329745	162329746	intronic-intronic
chr11	62715425	62715426	chr11	62834867	62834868	intergenic-intergenic
chr11	64256348	64256349	chr11	64712417	64712418	intronic-intergenic
chr11	64551480	64551481	chr11	64894681	64894682	intergenic-intronic
chr1	165304902	165304903	chr1	165297661	165297662	intergenic-intergenic
chr1	165374427	165374428	chr1	165435050	165435051	intergenic-intergenic
chr11	66926396	66926397	chr11	67163970	67163971	exonic-exonic
chr1	167666521	167666522	chr1	167593020	167593021	intergenic-intronic
chr1	167710408	167710409	chr1	167897794	167897795	intergenic-intronic
chr11	67817784	67817785	chr11	68010105	68010106	intronic-promoter
chr11	68213582	68213583	chr11	68155358	68155359	intergenic-intronic
chr11	68506440	68506441	chr11	68539546	68539547	promoter-intronic
chr11	68725689	68725690	chr11	68787370	68787371	intergenic-promoter
chr11	69231779	69231780	chr11	69220951	69220952	intergenic-exonic
chr11	69690354	69690355	chr11	69645641	69645642	exonic-intronic
chr11	69747945	69747946	chr11	69924670	69924671	intergenic-intergenic
chr11	70015494	70015495	chr11	70025876	70025877	intergenic-intergenic
chr11	70569380	70569381	chr11	70420290	70420291	promoter-promoter
chr11	70590952	70590953	chr11	70471887	70471888	intergenic-promoter
chr1	172562786	172562787	chr1	172774567	172774568	intergenic-intronic
chr1	173942234	173942235	chr1	173977086	173977087	intronic-intergenic
chr1	174339164	174339165	chr1	174322338	174322339	intergenic-intergenic
chr1	174342460	174342461	chr1	174420900	174420901	intergenic-exonic
chr1	174459168	174459169	chr1	174542607	174542608	intronic-intergenic
chr1	174562897	174562898	chr1	174581455	174581456	promoter-intergenic
chr11	75008600	75008601	chr11	74763915	74763916	intronic-intronic
chr11	74795171	74795172	chr11	74982117	74982118	intronic-promoter
chr11	74982375	74982376	chr11	74959490	74959491	promoter-intronic
chr11	75162247	75162248	chr11	74981640	74981641	promoter-promoter
chr11	75006452	75006453	chr11	75104586	75104587	intergenic-intergenic
chr1	175386661	175386662	chr1	176034416	176034417	intronic-intergenic
chr11	76707312	76707313	chr11	76585278	76585279	intergenic-intergenic
chr11	76906795	76906796	chr11	76595724	76595725	intronic-exonic
chr11	78844236	78844237	chr11	79107313	79107314	intronic-intergenic
chr11	78844339	78844340	chr11	78968955	78968956	intronic-intergenic
chr1	180786214	180786215	chr1	180870702	180870703	intronic-intergenic
chr11	82048888	82048889	chr11	82170966	82170967	intergenic-intergenic
chr11	82049191	82049192	chr11	82704256	82704257	intergenic-promoter
chr11	82069753	82069754	chr11	82489007	82489008	intergenic-intergenic
chr1	183546350	183546351	chr1	183061306	183061307	intergenic-intronic
chr11	83256569	83256570	chr11	83286029	83286030	exonic-promoter
chr1	183818957	183818958	chr1	184451796	184451797	intergenic-intergenic
chr1	184045854	184045855	chr1	184038948	184038949	intergenic-intergenic
chr11	8558231	8558232	chr11	8432127	8432128	intronic-intronic
chr1	184490566	184490567	chr1	184588086	184588087	intergenic-intergenic
chr11	85331624	85331625	chr11	85657212	85657213	intronic-intergenic
chr1	185481132	185481133	chr1	185371120	185371121	intergenic-intergenic
chr11	85529004	85529005	chr11	85587936	85587937	intronic-intronic
chr11	85636932	85636933	chr11	85544072	85544073	intronic-intronic
chr1	186059458	186059459	chr1	185678524	185678525	intergenic-intergenic
chr11	85705256	85705257	chr11	85785959	85785960	intronic-intergenic
chr1	186649284	186649285	chr1	186676408	186676409	intronic-intergenic
chr11	86708693	86708694	chr11	86887700	86887701	intergenic-promoter
chr1	188006913	188006914	chr1	187767623	187767624	intergenic-intergenic
chr11	87799818	87799819	chr11	87868181	87868182	promoter-intergenic
chr1	187867698	187867699	chr1	188060334	188060335	intergenic-intergenic
chr11	87913311	87913312	chr11	87974743	87974744	promoter-intronic
chr11	88001335	88001336	chr11	87929434	87929435	intronic-intronic
chr11	88006282	88006283	chr11	87966497	87966498	exonic-intronic
chr11	88481443	88481444	chr11	88251887	88251888	promoter-intronic
chr11	88256020	88256021	chr11	88682863	88682864	intronic-intergenic
chr11	88589880	88589881	chr11	88565295	88565296	exonic-intronic
chr11	90030578	90030579	chr11	89072831	89072832	intergenic-intergenic
chr1	191452371	191452372	chr1	191138981	191138982	intergenic-intronic
chr1	192621432	192621433	chr1	192226645	192226646	exonic-intergenic
chr1	194624852	194624853	chr1	194635832	194635833	intergenic-intergenic
chr11	94731489	94731490	chr11	94798429	94798430	intronic-promoter
chr1	195081956	195081957	chr1	194828992	194828993	intronic-intronic
chr1	195150595	195150596	chr1	195124814	195124815	intronic-intronic
chr11	96155779	96155780	chr11	96134243	96134244	intronic-intronic
chr11	96413582	96413583	chr11	96176248	96176249	intronic-intergenic
chr11	96397299	96397300	chr11	96255082	96255083	intronic-intergenic
chr11	96777924	96777925	chr11	96799086	96799087	promoter-intronic
chr11	96843937	96843938	chr11	97761377	97761378	intergenic-intergenic
chr11	97171527	97171528	chr11	97094032	97094033	intergenic-intronic
chr11	98319168	98319169	chr11	98274431	98274432	intergenic-promoter
chr11	98603251	98603252	chr11	98624069	98624070	promoter-intronic
chr11	98843189	98843190	chr11	99011344	99011345	intergenic-intronic
chr11	99241169	99241170	chr11	100159860	100159861	intergenic-intergenic
chr11	99274676	99274677	chr11	99324565	99324566	intergenic-intergenic
chr12	102079055	102079056	chr12	101916624	101916625	intronic-intronic
chr12	102190889	102190890	chr12	102267655	102267656	intronic-promoter
chr12	104586888	104586889	chr12	104663836	104663837	intronic-promoter
chr12	106178061	106178062	chr12	105659733	105659734	intronic-intergenic
chr12	105872873	105872874	chr12	105847434	105847435	intergenic-intergenic
chr12	105959083	105959084	chr12	105855745	105855746	intronic-intergenic
chr12	106052423	106052424	chr12	105871343	105871344	intronic-intergenic
chr12	105876575	105876576	chr12	105938296	105938297	intergenic-promoter
chr12	106051981	106051982	chr12	105978627	105978628	intronic-intronic
chr12	106007624	106007625	chr12	106052764	106052765	exonic-intronic
chr12	106192295	106192296	chr12	106263659	106263660	intronic-intergenic
chr12	106735974	106735975	chr12	106823170	106823171	intergenic-intronic
chr12	109244723	109244724	chr12	108714767	108714768	intergenic-intergenic
chr12	108986872	108986873	chr12	109216543	109216544	intergenic-intronic
chr12	109218249	109218250	chr12	109173951	109173952	intronic-intronic
chr12	109444947	109444948	chr12	109534994	109534995	intronic-intergenic
chr12	109571366	109571367	chr12	109565564	109565565	intergenic-intronic
chr12	110142140	110142141	chr12	110262196	110262197	intronic-intronic
chr12	112640444	112640445	chr12	112615918	112615919	intergenic-promoter
chr12	113384183	113384184	chr12	113448996	113448997	promoter-intergenic
chr12	113384604	113384605	chr12	113402896	113402897	promoter-intronic
chr12	113790265	113790266	chr12	113818129	113818130	intergenic-intergenic
chr12	114038628	114038629	chr12	114087971	114087972	intronic-intergenic
chr12	120081716	120081717	chr12	119766648	119766649	intergenic-intergenic
chr12	12630250	12630251	chr12	12788305	12788306	intergenic-intergenic
chr12	16761152	16761153	chr12	16808843	16808844	intronic-intergenic
chr12	21118557	21118558	chr12	21233636	21233637	promoter-intronic
chr12	25712198	25712199	chr12	25686183	25686184	intronic-intronic
chr12	25777778	25777779	chr12	26137816	26137817	intergenic-intergenic
chr12	27418542	27418543	chr12	28093054	28093055	intergenic-intergenic
chr12	28261850	28261851	chr12	28313328	28313329	intergenic-intergenic
chr12	30884338	30884339	chr12	31058309	31058310	intronic-promoter
chr12	31949894	31949895	chr12	31856103	31856104	promoter-intergenic
chr12	32652689	32652690	chr12	32621823	32621824	intronic-exonic
chr12	32652646	32652647	chr12	32822958	32822959	intronic-intergenic
chr12	3870987	3870988	chr12	4080360	4080361	intronic-intergenic
chr12	40764240	40764241	chr12	40300019	40300020	promoter-intergenic
chr12	52044807	52044808	chr12	51134099	51134100	intergenic-intergenic
chr12	5381373	5381374	chr12	5311273	5311274	intronic-intronic
chr12	54350032	54350033	chr12	54723758	54723759	promoter-intronic
chr12	54354053	54354054	chr12	54740543	54740544	intronic-intronic
chr12	54548903	54548904	chr12	54775033	54775034	intronic-intronic
chr12	6049468	6049469	chr12	6093207	6093208	intergenic-intergenic
chr12	70233138	70233139	chr12	69870545	69870546	intergenic-intergenic
chr12	70472393	70472394	chr12	70464454	70464455	promoter-intergenic
chr12	72678663	72678664	chr12	72459119	72459120	promoter-intronic
chr12	74077263	74077264	chr12	74556816	74556817	intergenic-intergenic
chr12	74810206	74810207	chr12	74855382	74855383	intronic-intronic
chr12	79156793	79156794	chr12	79867906	79867907	intergenic-intronic
chr12	80714690	80714691	chr12	81049060	81049061	intronic-intergenic
chr12	82283236	82283237	chr12	81898376	81898377	intronic-intronic
chr12	82093839	82093840	chr12	82159623	82159624	intergenic-intronic
chr12	83271915	83271916	chr12	83296128	83296129	promoter-intronic
chr12	85313219	85313220	chr12	85704176	85704177	intergenic-intronic
chr12	85504199	85504200	chr12	85560810	85560811	intronic-promoter
chr12	86096253	86096254	chr12	85880047	85880048	exonic-intergenic
chr12	85887188	85887189	chr12	86096371	86096372	intergenic-exonic
chr12	85994955	85994956	chr12	86096432	86096433	intergenic-exonic
chr12	86125559	86125560	chr12	86234998	86234999	intronic-intergenic
chr12	87295353	87295354	chr12	87420486	87420487	intronic-promoter
chr12	8888787	8888788	chr12	8750833	8750834	intergenic-exonic
chr12	8854340	8854341	chr12	8781768	8781769	intergenic-intronic
chr12	88136993	88136994	chr12	88247275	88247276	intergenic-intergenic
chr12	88137177	88137178	chr12	88235815	88235816	intergenic-intergenic
chr12	88143288	88143289	chr12	88226434	88226435	intergenic-promoter
chr12	9173169	9173170	chr12	9445577	9445578	intergenic-intergenic
chr12	93038542	93038543	chr12	92810227	92810228	intergenic-intronic
chr12	98367244	98367245	chr12	97968692	97968693	intergenic-intergenic
chr12	99586016	99586017	chr12	99471704	99471705	intergenic-intronic
chr13	102466305	102466306	chr13	101758797	101758798	intronic-intergenic
chr13	102571443	102571444	chr13	102866783	102866784	intergenic-intergenic
chr13	103963982	103963983	chr13	104136413	104136414	intronic-intergenic
chr13	108557716	108557717	chr13	108589388	108589389	intronic-intronic
chr13	111183601	111183602	chr13	111758165	111758166	intergenic-intergenic
chr13	112599227	112599228	chr13	112886620	112886621	promoter-intergenic
chr13	113320286	113320287	chr13	113247799	113247800	exonic-intergenic
chr13	114459769	114459770	chr13	114433820	114433821	intergenic-intergenic
chr13	12199347	12199348	chr13	11895199	11895200	promoter-intronic
chr13	119504791	119504792	chr13	119614254	119614255	intronic-intergenic
chr13	13981783	13981784	chr13	14357549	14357550	intergenic-intronic
chr13	15635973	15635974	chr13	14757671	14757672	intronic-intergenic
chr13	15559179	15559180	chr13	15851116	15851117	intronic-intergenic
chr13	15560403	15560404	chr13	15638895	15638896	intronic-intronic
chr13	18149347	18149348	chr13	18266294	18266295	intergenic-intronic
chr13	20363907	20363908	chr13	20091678	20091679	intronic-intergenic
chr13	22020607	22020608	chr13	22120917	22120918	intergenic-intergenic
chr13	24389202	24389203	chr13	24129341	24129342	intergenic-intronic
chr13	25116598	25116599	chr13	25208012	25208013	intergenic-intronic
chr13	29949465	29949466	chr13	30177119	30177120	intergenic-intergenic
chr13	30641027	30641028	chr13	30106922	30106923	intergenic-intergenic
chr13	30363621	30363622	chr13	30687767	30687768	intergenic-intergenic
chr13	30364890	30364891	chr13	30622633	30622634	intergenic-intergenic
chr13	31899211	31899212	chr13	31775644	31775645	promoter-intergenic
chr13	32860255	32860256	chr13	32891004	32891005	intronic-intergenic
chr13	33096204	33096205	chr13	33072621	33072622	promoter-intergenic
chr13	35119576	35119577	chr13	34912269	34912270	promoter-intergenic
chr13	3892166	3892167	chr13	3555494	3555495	promoter-intronic
chr13	3665005	3665006	chr13	3892362	3892363	intergenic-promoter
chr13	36881380	36881381	chr13	36828059	36828060	intergenic-intergenic
chr13	4000598	4000599	chr13	3923148	3923149	intergenic-promoter
chr13	43399621	43399622	chr13	43325917	43325918	promoter-intronic
chr13	44025415	44025416	chr13	43987772	43987773	intergenic-intergenic
chr13	44122249	44122250	chr13	44449561	44449562	intergenic-intergenic
chr13	44826966	44826967	chr13	44215364	44215365	promoter-intergenic
chr13	44515261	44515262	chr13	44591243	44591244	intergenic-intergenic
chr13	44828650	44828651	chr13	44588166	44588167	intronic-intergenic
chr13	44826854	44826855	chr13	44622250	44622251	promoter-intergenic
chr13	45096640	45096641	chr13	44623560	44623561	promoter-intergenic
chr13	44828971	44828972	chr13	44936155	44936156	intronic-promoter
chr13	45565595	45565596	chr13	45539906	45539907	intergenic-intergenic
chr13	46928529	46928530	chr13	47110110	47110111	intronic-promoter
chr13	48896723	48896724	chr13	48049874	48049875	intergenic-intergenic
chr13	48416263	48416264	chr13	48483882	48483883	intergenic-intergenic
chr13	48734496	48734497	chr13	48648754	48648755	intergenic-intergenic
chr13	48896136	48896137	chr13	48769669	48769670	intergenic-intergenic
chr13	51315766	51315767	chr13	51368966	51368967	intergenic-intergenic
chr13	51507911	51507912	chr13	51370423	51370424	intronic-intergenic
chr13	51514004	51514005	chr13	51477153	51477154	intronic-intergenic
chr13	52754010	52754011	chr13	53078133	53078134	intergenic-intergenic
chr13	53074809	53074810	chr13	52961823	52961824	intronic-intronic
chr13	53195563	53195564	chr13	54092372	54092373	intergenic-intergenic
chr13	53258506	53258507	chr13	53290390	53290391	intronic-intronic
chr13	53489473	53489474	chr13	53538048	53538049	promoter-intronic
chr13	54342689	54342690	chr13	54549498	54549499	intergenic-intergenic
chr13	54667007	54667008	chr13	54720458	54720459	promoter-intergenic
chr13	54901203	54901204	chr13	55051048	55051049	intergenic-promoter
chr13	55520124	55520125	chr13	55572810	55572811	intronic-intronic
chr13	55573001	55573002	chr13	55614963	55614964	intronic-promoter
chr13	55926351	55926352	chr13	55933980	55933981	intergenic-intergenic
chr13	56064246	56064247	chr13	55930924	55930925	intergenic-intronic
chr13	56247123	56247124	chr13	56272084	56272085	intergenic-intergenic
chr13	56683540	56683541	chr13	56708814	56708815	intergenic-intergenic
chr13	56854639	56854640	chr13	56796527	56796528	intergenic-intergenic
chr1	35783080	35783081	chr1	35993195	35993196	intergenic-intergenic
chr13	58250757	58250758	chr13	58647320	58647321	promoter-intergenic
chr13	58909299	58909300	chr13	59175288	59175289	promoter-intronic
chr13	60368987	60368988	chr13	60030551	60030552	intergenic-intergenic
chr13	60174280	60174281	chr13	60062054	60062055	intergenic-intergenic
chr13	60327411	60327412	chr13	60384672	60384673	intergenic-intergenic
chr13	63176111	63176112	chr13	63289541	63289542	intronic-intronic
chr13	63820288	63820289	chr13	63660836	63660837	intronic-intronic
chr13	63674873	63674874	chr13	63728870	63728871	intergenic-intergenic
chr1	36614881	36614882	chr1	36714284	36714285	promoter-intronic
chr1	36691654	36691655	chr1	36633709	36633710	intronic-intronic
chr1	36801766	36801767	chr1	36736144	36736145	intronic-intronic
chr13	67784784	67784785	chr13	67825226	67825227	promoter-intronic
chr13	69691917	69691918	chr13	69783020	69783021	intergenic-intergenic
chr13	69878480	69878481	chr13	70335405	70335406	promoter-intergenic
chr13	72430082	72430083	chr13	72761673	72761674	intergenic-exonic
chr13	74330301	74330302	chr13	74438922	74438923	exonic-intergenic
chr13	81901101	81901102	chr13	81665362	81665363	intergenic-intronic
chr1	38259766	38259767	chr1	38554159	38554160	intronic-intronic
chr1	38683977	38683978	chr1	38620877	38620878	promoter-intronic
chr1	38686363	38686364	chr1	38809857	38809858	intronic-intergenic
chr13	91836658	91836659	chr13	91225929	91225930	intronic-intronic
chr13	95221464	95221465	chr13	95621496	95621497	intronic-intergenic
chr13	95378372	95378373	chr13	95569141	95569142	intergenic-intronic
chr13	95788062	95788063	chr13	95861617	95861618	intronic-intronic
chr1	40436039	40436040	chr1	39593315	39593316	intergenic-promoter
chr13	98107732	98107733	chr13	98285281	98285282	intergenic-intergenic
chr13	98975889	98975890	chr13	98889691	98889692	promoter-intronic
chr13	99360130	99360131	chr13	99288841	99288842	intergenic-intergenic
chr13	99359276	99359277	chr13	99424244	99424245	intergenic-intergenic
chr1	39968673	39968674	chr1	39994444	39994445	intronic-intronic
chr1	40172650	40172651	chr1	40143312	40143313	intronic-promoter
chr14	101289125	101289126	chr14	101404964	101404965	intergenic-intergenic
chr14	104118509	104118510	chr14	104430138	104430139	intergenic-intergenic
chr14	104546290	104546291	chr14	105305007	105305008	intergenic-intronic
chr14	118990844	118990845	chr14	118547624	118547625	intronic-intronic
chr14	119016815	119016816	chr14	119167522	119167523	intronic-intergenic
chr14	12656615	12656616	chr14	12001093	12001094	intronic-intergenic
chr14	120251614	120251615	chr14	120115246	120115247	intronic-intronic
chr14	120220249	120220250	chr14	120404510	120404511	intronic-intergenic
chr14	12388422	12388423	chr14	12242036	12242037	intronic-intergenic
chr14	123352757	123352758	chr14	123753188	123753189	intronic-intronic
chr14	12503071	12503072	chr14	12589943	12589944	intronic-intronic
chr14	13456855	13456856	chr14	14031337	14031338	intronic-intronic
chr14	17394430	17394431	chr14	17407726	17407727	intronic-promoter
chr1	41867354	41867355	chr1	42762537	42762538	intergenic-intergenic
chr1	42771384	42771385	chr1	41868465	41868466	intergenic-intergenic
chr14	20525786	20525787	chr14	20637296	20637297	intergenic-intronic
chr14	20931456	20931457	chr14	21077064	21077065	intergenic-intergenic
chr14	22666415	22666416	chr14	22278923	22278924	promoter-intergenic
chr14	23394932	23394933	chr14	23601694	23601695	intronic-intronic
chr14	25130541	25130542	chr14	25177588	25177589	intergenic-intergenic
chr14	25599098	25599099	chr14	26284103	26284104	intergenic-intronic
chr1	42743598	42743599	chr1	42600592	42600593	intronic-intergenic
chr14	28621521	28621522	chr14	28882951	28882952	intronic-intronic
chr14	30949687	30949688	chr14	31265285	31265286	intronic-intronic
chr14	30949929	30949930	chr14	31057097	31057098	intronic-intronic
chr14	32028910	32028911	chr14	32047272	32047273	intergenic-intergenic
chr14	32470202	32470203	chr14	32604182	32604183	intronic-intronic
chr14	34446477	34446478	chr14	34621623	34621624	intronic-exonic
chr14	45762040	45762041	chr14	45695347	45695348	intronic-intergenic
chr14	46310564	46310565	chr14	45765026	45765027	intergenic-intronic
chr14	46058104	46058105	chr14	46149907	46149908	intergenic-promoter
chr14	46498188	46498189	chr14	47000374	47000375	intergenic-intronic
chr14	46982958	46982959	chr14	47007733	47007734	intergenic-intronic
chr14	48268845	48268846	chr14	48081527	48081528	promoter-intergenic
chr14	55558388	55558389	chr14	55482851	55482852	promoter-promoter
chr14	55531208	55531209	chr14	55482924	55482925	promoter-promoter
chr14	56498601	56498602	chr14	56511117	56511118	exonic-intronic
chr14	57723547	57723548	chr14	57579133	57579134	promoter-exonic
chr14	58152610	58152611	chr14	58182841	58182842	intronic-intronic
chr14	58654054	58654055	chr14	58784843	58784844	intergenic-intergenic
chr14	59256162	59256163	chr14	59171259	59171260	intergenic-intergenic
chr14	61307796	61307797	chr14	61390063	61390064	intronic-intronic
chr14	61389962	61389963	chr14	61335698	61335699	intronic-intronic
chr14	62681503	62681504	chr14	62757101	62757102	intergenic-intergenic
chr14	63685819	63685820	chr14	63814611	63814612	intergenic-intergenic
chr14	63814943	63814944	chr14	63719965	63719966	intergenic-intergenic
chr14	64225479	64225480	chr14	64300686	64300687	promoter-intronic
chr14	65072465	65072466	chr14	64832385	64832386	intronic-intronic
chr14	66766696	66766697	chr14	66719385	66719386	intronic-intronic
chr14	67807650	67807651	chr14	67574422	67574423	intergenic-intergenic
chr14	67808140	67808141	chr14	67666632	67666633	intergenic-intronic
chr14	67989500	67989501	chr14	68192005	68192006	intronic-intergenic
chr14	68551816	68551817	chr14	68430024	68430025	promoter-intronic
chr14	70261382	70261383	chr14	70535115	70535116	intronic-intronic
chr14	70949098	70949099	chr14	71169481	71169482	intergenic-intergenic
chr14	71017822	71017823	chr14	71047236	71047237	promoter-exonic
chr14	73519281	73519282	chr14	73298468	73298469	intergenic-intergenic
chr14	74175971	74175972	chr14	74956467	74956468	intergenic-intergenic
chr14	74176126	74176127	chr14	75109126	75109127	intergenic-intergenic
chr14	75163581	75163582	chr14	75415816	75415817	exonic-promoter
chr14	75164363	75164364	chr14	75390523	75390524	exonic-intergenic
chr14	76905949	76905950	chr14	77418966	77418967	intronic-intergenic
chr14	78687675	78687676	chr14	77736988	77736989	intronic-intronic
chr14	79534772	79534773	chr14	79668834	79668835	intronic-intergenic
chr14	84848068	84848069	chr14	84690052	84690053	exonic-intergenic
chr14	84847798	84847799	chr14	84853064	84853065	exonic-intronic
chr14	9133025	9133026	chr14	9180237	9180238	intronic-intergenic
chr15	100324907	100324908	chr15	100444377	100444378	promoter-intergenic
chr15	100935881	100935882	chr15	100989772	100989773	intergenic-intergenic
chr15	101938554	101938555	chr15	101973813	101973814	intronic-promoter
chr15	102008678	102008679	chr15	102055077	102055078	intronic-exonic
chr15	102008867	102008868	chr15	102089338	102089339	intronic-intergenic
chr15	102009036	102009037	chr15	102033562	102033563	exonic-promoter
chr15	102088453	102088454	chr15	102126769	102126770	promoter-promoter
chr15	102529033	102529034	chr15	102573267	102573268	intergenic-intergenic
chr15	102583931	102583932	chr15	102615499	102615500	intergenic-intergenic
chr15	102584720	102584721	chr15	102840565	102840566	intergenic-promoter
chr15	102637972	102637973	chr15	102948533	102948534	intronic-intergenic
chr15	102818241	102818242	chr15	102998692	102998693	intergenic-promoter
chr15	102844590	102844591	chr15	103007563	103007564	promoter-intergenic
chr15	103110031	103110032	chr15	103135706	103135707	intronic-intergenic
chr15	103146062	103146063	chr15	103153671	103153672	exonic-intronic
chr15	10638503	10638504	chr15	10794961	10794962	intronic-intergenic
chr15	11250847	11250848	chr15	10879106	10879107	intronic-intergenic
chr15	10968362	10968363	chr15	11190028	11190029	promoter-intronic
chr15	10968375	10968376	chr15	10993205	10993206	promoter-intergenic
chr15	12197539	12197540	chr15	12515476	12515477	intronic-intronic
chr15	13103146	13103147	chr15	12898948	12898949	promoter-intergenic
chr15	13102842	13102843	chr15	13789398	13789399	promoter-intergenic
chr15	25342382	25342383	chr15	24529294	24529295	intronic-intergenic
chr15	25923250	25923251	chr15	26141830	26141831	intronic-intergenic
chr15	27119547	27119548	chr15	26554067	26554068	intergenic-intronic
chr15	27849776	27849777	chr15	27926497	27926498	intronic-intronic
chr1	52874460	52874461	chr1	53012320	53012321	promoter-intronic
chr15	34608457	34608458	chr15	34634271	34634272	promoter-intergenic
chr15	35256177	35256178	chr15	35197728	35197729	intronic-intergenic
chr15	35222871	35222872	chr15	36077957	36077958	intergenic-intergenic
chr15	35223173	35223174	chr15	35845314	35845315	intergenic-intronic
chr15	38229815	38229816	chr15	38404368	38404369	promoter-intergenic
chr15	38638826	38638827	chr15	38963511	38963512	intergenic-intronic
chr15	39911588	39911589	chr15	39943566	39943567	intergenic-intergenic
chr15	40994486	40994487	chr15	41493015	41493016	intergenic-intronic
chr15	52961049	52961050	chr15	53179274	53179275	intronic-intergenic
chr15	53158212	53158213	chr15	53005453	53005454	intronic-intronic
chr15	53176736	53176737	chr15	53096023	53096024	exonic-intronic
chr15	53617216	53617217	chr15	53230395	53230396	intronic-intergenic
chr15	57743918	57743919	chr15	57354924	57354925	promoter-intergenic
chr15	58809626	58809627	chr15	59183382	59183383	intronic-promoter
chr15	58813356	58813357	chr15	59120689	59120690	intronic-intronic
chr15	59928827	59928828	chr15	59735359	59735360	intergenic-intergenic
chr15	71882153	71882154	chr15	71874879	71874880	intergenic-intergenic
chr1	57262064	57262065	chr1	57418413	57418414	intronic-intronic
chr15	76364893	76364894	chr15	75763224	75763225	intergenic-intergenic
chr15	76027286	76027287	chr15	76078306	76078307	intronic-exonic
chr15	76063392	76063393	chr15	76033221	76033222	promoter-intronic
chr15	76491363	76491364	chr15	76528448	76528449	promoter-exonic
chr15	76491810	76491811	chr15	76532541	76532542	promoter-promoter
chr15	76859948	76859949	chr15	76801945	76801946	intronic-intergenic
chr15	77669240	77669241	chr15	77721890	77721891	intronic-intergenic
chr1	57830688	57830689	chr1	58054425	58054426	intergenic-intronic
chr1	57832874	57832875	chr1	57929530	57929531	intronic-intronic
chr15	78363601	78363602	chr15	78632332	78632333	intergenic-promoter
chr15	78418200	78418201	chr15	78453909	78453910	intergenic-intergenic
chr15	78657328	78657329	chr15	78679106	78679107	intergenic-intronic
chr15	78745427	78745428	chr15	78773550	78773551	intronic-intergenic
chr15	79073946	79073947	chr15	79441424	79441425	intronic-exonic
chr15	80120067	80120068	chr15	80171083	80171084	intronic-intronic
chr15	81069932	81069933	chr15	81132607	81132608	intergenic-intergenic
chr15	83045903	83045904	chr15	83142718	83142719	intergenic-intronic
chr15	83495128	83495129	chr15	83556413	83556414	intronic-promoter
chr15	83530529	83530530	chr15	83545534	83545535	intronic-intronic
chr15	84279974	84279975	chr15	84444802	84444803	intergenic-intergenic
chr15	84444794	84444795	chr15	84459783	84459784	intergenic-intergenic
chr15	84530945	84530946	chr15	84585759	84585760	intronic-intronic
chr15	84585695	84585696	chr15	84826802	84826803	intronic-intergenic
chr15	84660059	84660060	chr15	84722278	84722279	intronic-intergenic
chr15	84832067	84832068	chr15	84873420	84873421	intergenic-promoter
chr15	85869452	85869453	chr15	85739645	85739646	intergenic-intronic
chr15	86235874	86235875	chr15	86227115	86227116	intronic-intronic
chr15	90045548	90045549	chr15	89859985	89859986	intergenic-intergenic
chr15	92264995	92264996	chr15	92984641	92984642	intronic-intergenic
chr15	92278986	92278987	chr15	93046525	93046526	intronic-intergenic
chr15	92428412	92428413	chr15	93015303	93015304	promoter-intergenic
chr15	93228487	93228488	chr15	93179687	93179688	promoter-intergenic
chr15	93349929	93349930	chr15	93399375	93399376	promoter-intronic
chr15	93605224	93605225	chr15	93733332	93733333	intergenic-intergenic
chr15	97548461	97548462	chr15	97829208	97829209	intronic-intronic
chr15	97679960	97679961	chr15	97655733	97655734	intergenic-intronic
chr15	98447540	98447541	chr15	98373497	98373498	intergenic-intergenic
chr15	98616075	98616076	chr15	98449897	98449898	intergenic-intergenic
chr15	98463194	98463195	chr15	98468819	98468820	promoter-intronic
chr15	98722808	98722809	chr15	98824432	98824433	intergenic-intergenic
chr15	98880067	98880068	chr15	98845178	98845179	intergenic-intergenic
chr15	99327791	99327792	chr15	99501424	99501425	exonic-promoter
chr15	99519358	99519359	chr15	99484153	99484154	intronic-intergenic
chr15	99519856	99519857	chr15	99605931	99605932	intronic-intergenic
chr1	61018151	61018152	chr1	60310858	60310859	intergenic-intronic
chr16	11036430	11036431	chr16	10902588	10902589	intergenic-intergenic
chr16	11909412	11909413	chr16	11797883	11797884	promoter-intergenic
chr16	12608831	12608832	chr16	12720686	12720687	intergenic-intergenic
chr16	13160462	13160463	chr16	13618792	13618793	intergenic-intronic
chr16	13987220	13987221	chr16	13819797	13819798	promoter-promoter
chr16	15084537	15084538	chr16	14970317	14970318	intergenic-intergenic
chr16	17785643	17785644	chr16	17848513	17848514	intronic-intronic
chr1	61974416	61974417	chr1	61836840	61836841	intronic-intronic
chr1	61986212	61986213	chr1	62759204	62759205	intronic-intronic
chr16	21225728	21225729	chr16	21353206	21353207	intergenic-intergenic
chr16	21947572	21947573	chr16	21837324	21837325	promoter-promoter
chr16	22310501	22310502	chr16	22577685	22577686	intergenic-intronic
chr16	22876681	22876682	chr16	22973637	22973638	intronic-intergenic
chr16	26234327	26234328	chr16	26777429	26777430	intergenic-intergenic
chr1	62769156	62769157	chr1	63420231	63420232	intronic-intergenic
chr16	28753319	28753320	chr16	28655386	28655387	promoter-intronic
chr16	29735517	29735518	chr16	29893816	29893817	intergenic-intergenic
chr16	30066393	30066394	chr16	30174358	30174359	promoter-intergenic
chr16	30597398	30597399	chr16	31071047	31071048	intergenic-intronic
chr16	31501715	31501716	chr16	31619037	31619038	intergenic-promoter
chr16	33306749	33306750	chr16	33820804	33820805	intergenic-intergenic
chr16	33560848	33560849	chr16	33742732	33742733	intronic-intronic
chr16	33999752	33999753	chr16	34115553	34115554	intronic-intronic
chr16	34606501	34606502	chr16	34556978	34556979	intergenic-intergenic
chr16	34667526	34667527	chr16	34613036	34613037	intronic-intergenic
chr16	38902553	38902554	chr16	39056516	39056517	promoter-intergenic
chr1	64168955	64168956	chr1	64133437	64133438	promoter-intronic
chr16	43574787	43574788	chr16	43799657	43799658	intronic-intronic
chr16	44695847	44695848	chr16	44703974	44703975	intergenic-intergenic
chr16	45974367	45974368	chr16	46020185	46020186	intronic-intergenic
chr16	4633075	4633076	chr16	4667287	4667288	intronic-intronic
chr16	4658866	4658867	chr16	4640113	4640114	intronic-promoter
chr1	64764234	64764235	chr1	64773675	64773676	intronic-intergenic
chr16	55821592	55821593	chr16	55710101	55710102	promoter-intergenic
chr16	63871777	63871778	chr16	64723558	64723559	intergenic-intergenic
chr16	63872375	63872376	chr16	64723558	64723559	intergenic-intergenic
chr16	6840178	6840179	chr16	7150724	7150725	intronic-intronic
chr16	70569014	70569015	chr16	70161067	70161068	intronic-intergenic
chr16	76786917	76786918	chr16	76289487	76289488	intergenic-intergenic
chr16	8884559	8884560	chr16	9701263	9701264	intergenic-intronic
chr16	90380307	90380308	chr16	91314597	91314598	intergenic-intergenic
chr16	92884303	92884304	chr16	92864740	92864741	intergenic-intergenic
chr1	69735753	69735754	chr1	69348028	69348029	intergenic-intergenic
chr16	94840392	94840393	chr16	94681659	94681660	intronic-exonic
chr16	95038334	95038335	chr16	95219040	95219041	intronic-promoter
chr16	96689393	96689394	chr16	96647996	96647997	promoter-intronic
chr17	10549053	10549054	chr17	10518985	10518986	intergenic-intergenic
chr17	10694437	10694438	chr17	10684757	10684758	intronic-intronic
chr17	12403681	12403682	chr17	12396654	12396655	intronic-intronic
chr17	12882572	12882573	chr17	12800637	12800638	intronic-intronic
chr17	13073176	13073177	chr17	13203007	13203008	intergenic-intronic
chr17	15202700	15202701	chr17	15604958	15604959	intronic-intergenic
chr17	21368591	21368592	chr17	21652838	21652839	intergenic-intronic
chr1	72360141	72360142	chr1	72399796	72399797	intronic-intronic
chr1	72629857	72629858	chr1	72454909	72454910	promoter-intergenic
chr17	24791071	24791072	chr17	24668140	24668141	intergenic-intronic
chr17	25500981	25500982	chr17	25408501	25408502	intergenic-intronic
chr17	25836166	25836167	chr17	25647203	25647204	promoter-intergenic
chr17	27436373	27436374	chr17	27641743	27641744	promoter-intronic
chr17	28828171	28828172	chr17	28846472	28846473	promoter-intronic
chr17	29308069	29308070	chr17	29235412	29235413	intronic-promoter
chr17	29534004	29534005	chr17	29553998	29553999	intergenic-intergenic
chr17	29933924	29933925	chr17	30019966	30019967	intergenic-intronic
chr17	31156838	31156839	chr17	31256831	31256832	intergenic-intergenic
chr17	31866046	31866047	chr17	31993718	31993719	intergenic-promoter
chr17	32421955	32421956	chr17	32303745	32303746	promoter-promoter
chr17	34164588	34164589	chr17	34179230	34179231	promoter-exonic
chr17	34272509	34272510	chr17	34249144	34249145	promoter-exonic
chr17	34387080	34387081	chr17	34486583	34486584	intronic-intronic
chr17	34692838	34692839	chr17	34723753	34723754	intronic-intronic
chr17	35138480	35138481	chr17	35257030	35257031	promoter-intronic
chr17	35158264	35158265	chr17	35243025	35243026	intronic-intergenic
chr17	35303906	35303907	chr17	35374058	35374059	intergenic-promoter
chr17	35367944	35367945	chr17	35317056	35317057	intronic-intergenic
chr17	36002791	36002792	chr17	36016970	36016971	promoter-promoter
chr17	37052182	37052183	chr17	37186891	37186892	intergenic-promoter
chr1	74042844	74042845	chr1	74089399	74089400	intronic-intronic
chr17	42740409	42740410	chr17	42666204	42666205	intronic-intergenic
chr17	43655621	43655622	chr17	43748109	43748110	intergenic-intronic
chr17	44393928	44393929	chr17	44271041	44271042	intronic-intergenic
chr17	44872323	44872324	chr17	45388508	45388509	promoter-intergenic
chr17	45718733	45718734	chr17	45114630	45114631	intergenic-intronic
chr17	45700804	45700805	chr17	45558821	45558822	promoter-intronic
chr17	45894542	45894543	chr17	46166477	46166478	promoter-intronic
chr17	47545556	47545557	chr17	47638366	47638367	intergenic-promoter
chr17	47648655	47648656	chr17	47747995	47747996	intronic-promoter
chr17	47748611	47748612	chr17	47813627	47813628	promoter-intronic
chr17	47930428	47930429	chr17	48001736	48001737	intergenic-intergenic
chr17	47934196	47934197	chr17	47962568	47962569	intergenic-intronic
chr17	48001620	48001621	chr17	48182407	48182408	intergenic-intergenic
chr17	48060156	48060157	chr17	48102630	48102631	intronic-intergenic
chr17	4908375	4908376	chr17	4824007	4824008	intergenic-intergenic
chr17	49070902	49070903	chr17	49290157	49290158	intergenic-intergenic
chr17	49321759	49321760	chr17	49076150	49076151	intergenic-intronic
chr17	49701540	49701541	chr17	49988701	49988702	intronic-intronic
chr1	75047276	75047277	chr1	74996639	74996640	intronic-intronic
chr17	50082337	50082338	chr17	50107689	50107690	intergenic-intergenic
chr1	75251106	75251107	chr1	75176889	75176890	intronic-promoter
chr17	51916882	51916883	chr17	51908360	51908361	intronic-intronic
chr1	75464126	75464127	chr1	75360081	75360082	intronic-exonic
chr17	5429562	5429563	chr17	5753358	5753359	intronic-exonic
chr1	75650400	75650401	chr1	75936538	75936539	intergenic-intergenic
chr17	5923135	5923136	chr17	5902157	5902158	intronic-intronic
chr17	70779948	70779949	chr17	70962489	70962490	intronic-intronic
chr17	71661289	71661290	chr17	71708765	71708766	promoter-intronic
chr17	72012570	72012571	chr17	72131612	72131613	intronic-promoter
chr1	77254475	77254476	chr1	77426597	77426598	intergenic-intronic
chr17	8014329	8014330	chr17	7799719	7799720	intronic-intergenic
chr17	79003887	79003888	chr17	78954055	78954056	intronic-intronic
chr17	81152011	81152012	chr17	81404119	81404120	intergenic-intergenic
chr17	84297033	84297034	chr17	84585288	84585289	intergenic-exonic
chr17	84372941	84372942	chr17	84299147	84299148	intergenic-intergenic
chr17	84427749	84427750	chr17	84783764	84783765	intergenic-intronic
chr17	85515969	85515970	chr17	85377469	85377470	intronic-intronic
chr17	86561557	86561558	chr17	86770741	86770742	intergenic-intronic
chr17	87720753	87720754	chr17	87929887	87929888	exonic-intergenic
chr17	88840776	88840777	chr17	88907944	88907945	promoter-intergenic
chr18	13470637	13470638	chr18	13136577	13136578	intergenic-intronic
chr18	13296824	13296825	chr18	13877360	13877361	intergenic-intronic
chr18	14026719	14026720	chr18	13593059	13593060	intronic-intergenic
chr18	13945896	13945897	chr18	14150022	14150023	intronic-intergenic
chr18	21291298	21291299	chr18	21752501	21752502	intronic-intronic
chr18	21291582	21291583	chr18	21458633	21458634	intronic-promoter
chr18	24717867	24717868	chr18	24443421	24443422	intergenic-exonic
chr18	24626670	24626671	chr18	24621285	24621286	intergenic-intergenic
chr18	24867046	24867047	chr18	25114301	25114302	promoter-intronic
chr18	29798378	29798379	chr18	29105838	29105839	intergenic-intergenic
chr18	34239571	34239572	chr18	34348199	34348200	intergenic-intergenic
chr18	35181834	35181835	chr18	35279687	35279688	intronic-intronic
chr18	36118873	36118874	chr18	36356281	36356282	intergenic-promoter
chr18	36185052	36185053	chr18	36281321	36281322	intronic-intronic
chr18	36899649	36899650	chr18	36805138	36805139	intronic-intronic
chr18	37249646	37249647	chr18	37377038	37377039	promoter-intronic
chr1	83733692	83733693	chr1	83739854	83739855	intergenic-intergenic
chr18	38001699	38001700	chr18	37982543	37982544	intergenic-intronic
chr18	38369439	38369440	chr18	38293634	38293635	promoter-intergenic
chr18	38369529	38369530	chr18	38351315	38351316	promoter-intronic
chr18	38925055	38925056	chr18	38861018	38861019	intergenic-intergenic
chr18	39050063	39050064	chr18	39090062	39090063	intronic-intronic
chr18	42169452	42169453	chr18	42304458	42304459	intergenic-intronic
chr18	43335122	43335123	chr18	42901537	42901538	intergenic-intronic
chr18	43363915	43363916	chr18	43481589	43481590	intergenic-promoter
chr18	46298948	46298949	chr18	46091417	46091418	intergenic-intergenic
chr18	47530200	47530201	chr18	47662108	47662109	intergenic-intergenic
chr18	49660672	49660673	chr18	49798702	49798703	intergenic-intergenic
chr18	55293598	55293599	chr18	55513840	55513841	intergenic-intergenic
chr18	56223484	56223485	chr18	55405994	55405995	intergenic-intergenic
chr18	55666533	55666534	chr18	55708505	55708506	intergenic-intergenic
chr18	60927016	60927017	chr18	60548361	60548362	intergenic-intronic
chr18	61138152	61138153	chr18	60999242	60999243	intronic-exonic
chr18	61844794	61844795	chr18	61799525	61799526	intergenic-promoter
chr18	65181835	65181836	chr18	65314527	65314528	intronic-intronic
chr18	65954844	65954845	chr18	66081636	66081637	intergenic-intergenic
chr18	66094602	66094603	chr18	66181936	66181937	exonic-intergenic
chr18	66237457	66237458	chr18	66526402	66526403	intronic-intergenic
chr18	66528100	66528101	chr18	67000590	67000591	intergenic-intergenic
chr18	66581300	66581301	chr18	66662733	66662734	intergenic-intergenic
chr18	67772173	67772174	chr18	67626891	67626892	intergenic-intronic
chr18	67928061	67928062	chr18	67800982	67800983	intergenic-promoter
chr18	70058490	70058491	chr18	70344585	70344586	intergenic-intergenic
chr18	74602947	74602948	chr18	75120614	75120615	promoter-promoter
chr18	75943315	75943316	chr18	76306997	76306998	intergenic-exonic
chr18	78408955	78408956	chr18	78433698	78433699	intronic-intronic
chr18	78627363	78627364	chr18	79043370	79043371	intronic-intronic
chr18	80687209	80687210	chr18	80745495	80745496	intergenic-intergenic
chr18	80807980	80807981	chr18	80911084	80911085	intronic-intergenic
chr18	83026044	83026045	chr18	82656712	82656713	promoter-intronic
chr1	88286158	88286159	chr1	88326681	88326682	intergenic-intergenic
chr18	82935642	82935643	chr18	83026127	83026128	intergenic-promoter
chr18	83244232	83244233	chr18	83532437	83532438	intergenic-intergenic
chr1	88401708	88401709	chr1	88422630	88422631	intergenic-promoter
chr1	89081959	89081960	chr1	89051393	89051394	intergenic-promoter
chr1	89070559	89070560	chr1	89965885	89965886	intergenic-intronic
chr1	89071010	89071011	chr1	89083694	89083695	intergenic-promoter
chr1	90648934	90648935	chr1	91093633	91093634	intergenic-intergenic
chr19	10257660	10257661	chr19	10176682	10176683	promoter-promoter
chr19	10293652	10293653	chr19	10332654	10332655	promoter-intronic
chr19	10333800	10333801	chr19	10462981	10462982	intronic-promoter
chr19	10524616	10524617	chr19	10598793	10598794	exonic-promoter
chr19	11054371	11054372	chr19	10954917	10954918	intronic-intronic
chr19	15944057	15944058	chr19	15843865	15843866	intergenic-intergenic
chr19	17724432	17724433	chr19	17590827	17590828	intronic-intronic
chr19	21853547	21853548	chr19	21899859	21899860	promoter-intronic
chr19	23216501	23216502	chr19	23082686	23082687	promoter-intergenic
chr1	92499806	92499807	chr1	92803168	92803169	promoter-intergenic
chr19	25697872	25697873	chr19	25680967	25680968	exonic-intergenic
chr19	29898382	29898383	chr19	29772610	29772611	intergenic-promoter
chr19	32285464	32285465	chr19	32452130	32452131	promoter-intronic
chr19	32561297	32561298	chr19	32732013	32732014	intronic-intronic
chr19	3451222	3451223	chr19	3441248	3441249	intergenic-intergenic
chr1	93583404	93583405	chr1	93483149	93483150	intergenic-intergenic
chr19	3686197	3686198	chr19	3767792	3767793	promoter-promoter
chr19	37618154	37618155	chr19	37509079	37509080	intergenic-promoter
chr19	37604795	37604796	chr19	37576149	37576150	intergenic-intergenic
chr1	93811010	93811011	chr1	94339326	94339327	intergenic-intronic
chr19	38161845	38161846	chr19	38259298	38259299	intergenic-intergenic
chr19	40466311	40466312	chr19	40548699	40548700	intronic-intronic
chr19	41037820	41037821	chr19	41089627	41089628	intronic-intergenic
chr19	41164592	41164593	chr19	41179634	41179635	intronic-intronic
chr19	4257679	4257680	chr19	4309599	4309600	intergenic-intergenic
chr19	42873058	42873059	chr19	43011213	43011214	intronic-intronic
chr19	44657328	44657329	chr19	44714757	44714758	intergenic-intergenic
chr19	45189025	45189026	chr19	45235963	45235964	intergenic-intergenic
chr19	45368130	45368131	chr19	45375071	45375072	intergenic-intergenic
chr19	45619840	45619841	chr19	45648592	45648593	promoter-intronic
chr19	47538986	47538987	chr19	47376384	47376385	promoter-intronic
chr19	47412594	47412595	chr19	47391807	47391808	intronic-intronic
chr19	5056467	5056468	chr19	5073302	5073303	exonic-intergenic
chr19	5117345	5117346	chr19	5098165	5098166	exonic-promoter
chr19	53155942	53155943	chr19	53123933	53123934	intronic-intergenic
chr1	95341174	95341175	chr1	95399312	95399313	intronic-intronic
chr19	5529970	5529971	chr19	5690054	5690055	intergenic-promoter
chr19	55488688	55488689	chr19	55866153	55866154	intronic-intronic
chr19	55531604	55531605	chr19	56329546	56329547	intronic-intergenic
chr19	55817548	55817549	chr19	56050544	56050545	intronic-intergenic
chr19	55900461	55900462	chr19	55932450	55932451	intronic-intronic
chr19	56497750	56497751	chr19	56842740	56842741	intronic-intergenic
chr19	57141183	57141184	chr19	57210531	57210532	intronic-intronic
chr19	57717489	57717490	chr19	57668005	57668006	intronic-intergenic
chr19	5795936	5795937	chr19	5850385	5850386	exonic-intronic
chr19	58530494	58530495	chr19	58409664	58409665	promoter-intronic
chr19	58880923	58880924	chr19	59841119	59841120	intronic-intergenic
chr19	6260166	6260167	chr19	6103726	6103727	intronic-intergenic
chr19	6401581	6401582	chr19	7310869	7310870	promoter-intronic
chr19	7138962	7138963	chr19	7285010	7285011	intronic-intergenic
chr19	7142736	7142737	chr19	7257266	7257267	intronic-intronic
chr19	7143073	7143074	chr19	7347358	7347359	intronic-intronic
chr2	10064409	10064410	chr2	10210128	10210129	intergenic-intergenic
chr2	101547352	101547353	chr2	101806571	101806572	intergenic-intronic
chr2	10296394	10296395	chr2	10747320	10747321	promoter-intergenic
chr2	103974754	103974755	chr2	104262475	104262476	intergenic-intergenic
chr2	104856956	104856957	chr2	104932602	104932603	promoter-intronic
chr2	106636501	106636502	chr2	106327287	106327288	intronic-intergenic
chr2	106795720	106795721	chr2	106510820	106510821	intergenic-intergenic
chr2	112101871	112101872	chr2	112056385	112056386	promoter-intergenic
chr2	112615062	112615063	chr2	112561275	112561276	intronic-intronic
chr2	11524968	11524969	chr2	11303731	11303732	promoter-intergenic
chr2	113167754	113167755	chr2	113270970	113270971	promoter-intronic
chr2	113376051	113376052	chr2	113688023	113688024	intronic-promoter
chr2	113416279	113416280	chr2	113479753	113479754	intronic-intronic
chr2	116723159	116723160	chr2	117006112	117006113	intergenic-intergenic
chr2	116725458	116725459	chr2	116958743	116958744	promoter-intronic
chr2	118312882	118312883	chr2	118371563	118371564	intergenic-intronic
chr2	118728517	118728518	chr2	118802469	118802470	intronic-intergenic
chr2	120692692	120692693	chr2	120562168	120562169	intronic-exonic
chr2	121895774	121895775	chr2	122204371	122204372	intronic-intergenic
chr2	127287650	127287651	chr2	127300163	127300164	intronic-intronic
chr2	127905208	127905209	chr2	128342708	128342709	intronic-intergenic
chr2	129501004	129501005	chr2	129699350	129699351	intergenic-intergenic
chr2	129699425	129699426	chr2	129850032	129850033	intergenic-intronic
chr2	130120164	130120165	chr2	130255977	130255978	intergenic-intronic
chr2	130967835	130967836	chr2	130923816	130923817	intronic-intergenic
chr2	131248605	131248606	chr2	131335990	131335991	intergenic-intronic
chr2	131249764	131249765	chr2	131354150	131354151	intergenic-intergenic
chr2	131765928	131765929	chr2	131487809	131487810	intronic-intergenic
chr2	13186556	13186557	chr2	13522204	13522205	intronic-intergenic
chr2	132672433	132672434	chr2	132729432	132729433	promoter-intergenic
chr2	13373605	13373606	chr2	13334094	13334095	intronic-intronic
chr2	133375820	133375821	chr2	133552882	133552883	intergenic-intergenic
chr2	135264745	135264746	chr2	135217854	135217855	intronic-intronic
chr2	13594801	13594802	chr2	13727601	13727602	intronic-intergenic
chr2	136718013	136718014	chr2	136747833	136747834	promoter-intronic
chr2	136940755	136940756	chr2	136906995	136906996	intronic-intergenic
chr2	13978051	13978052	chr2	13995867	13995868	promoter-promoter
chr2	141850932	141850933	chr2	141385410	141385411	intronic-intronic
chr2	142793042	142793043	chr2	142920630	142920631	intergenic-intergenic
chr2	144992753	144992754	chr2	144928360	144928361	intergenic-intergenic
chr2	145729427	145729428	chr2	145341525	145341526	promoter-intronic
chr2	146785442	146785443	chr2	146297968	146297969	intronic-intronic
chr2	148677044	148677045	chr2	148728367	148728368	promoter-intergenic
chr2	151937809	151937810	chr2	152023076	152023077	intergenic-intergenic
chr2	152519499	152519500	chr2	152657403	152657404	intronic-promoter
chr2	153778905	153778906	chr2	153762222	153762223	intronic-intergenic
chr2	154418989	154418990	chr2	154438792	154438793	intronic-promoter
chr2	154529041	154529042	chr2	154689485	154689486	intergenic-intronic
chr2	156439172	156439173	chr2	156529787	156529788	promoter-intronic
chr2	156817804	156817805	chr2	156776922	156776923	promoter-intronic
chr2	157283517	157283518	chr2	157306004	157306005	intronic-intergenic
chr2	157933059	157933060	chr2	158035720	158035721	intergenic-intronic
chr2	158989697	158989698	chr2	158887820	158887821	intergenic-intergenic
chr2	158989845	158989846	chr2	158900378	158900379	intergenic-intergenic
chr2	159412563	159412564	chr2	160397157	160397158	intergenic-intergenic
chr2	162484908	162484909	chr2	161756582	161756583	intronic-intronic
chr2	164937673	164937674	chr2	165096742	165096743	exonic-intergenic
chr2	165162736	165162737	chr2	164939365	164939366	intergenic-intronic
chr2	165190232	165190233	chr2	165285046	165285047	intronic-intronic
chr2	165393145	165393146	chr2	165490827	165490828	intergenic-promoter
chr2	165651556	165651557	chr2	165739772	165739773	intronic-intergenic
chr2	165980596	165980597	chr2	166299715	166299716	promoter-intergenic
chr2	165981268	165981269	chr2	166172451	166172452	promoter-intergenic
chr2	166202957	166202958	chr2	166273825	166273826	intergenic-promoter
chr2	167243560	167243561	chr2	167185439	167185440	intergenic-intergenic
chr2	167514149	167514150	chr2	167717656	167717657	promoter-intergenic
chr2	167812329	167812330	chr2	167940628	167940629	intronic-intergenic
chr2	167842497	167842498	chr2	167923707	167923708	intergenic-intronic
chr2	168729897	168729898	chr2	168074593	168074594	intronic-intergenic
chr2	168453679	168453680	chr2	168320686	168320687	intergenic-intronic
chr2	170347213	170347214	chr2	170853156	170853157	intergenic-intergenic
chr2	172376071	172376072	chr2	172653007	172653008	promoter-intergenic
chr2	172774627	172774628	chr2	172808850	172808851	intergenic-intronic
chr2	172933262	172933263	chr2	173010137	173010138	exonic-intergenic
chr2	172933527	172933528	chr2	173009554	173009555	intronic-intergenic
chr2	173615785	173615786	chr2	173574111	173574112	intergenic-intronic
chr2	174500042	174500043	chr2	174622582	174622583	intronic-intergenic
chr2	177872738	177872739	chr2	177999002	177999003	intronic-intronic
chr2	18919978	18919979	chr2	18845031	18845032	promoter-intronic
chr2	25691961	25691962	chr2	25786715	25786716	intergenic-intronic
chr2	27092936	27092937	chr2	26792868	26792869	intronic-intronic
chr2	27281907	27281908	chr2	27222623	27222624	promoter-intronic
chr2	27625727	27625728	chr2	27894121	27894122	intergenic-exonic
chr2	27627783	27627784	chr2	27832072	27832073	intergenic-intronic
chr2	28448530	28448531	chr2	28477933	28477934	intergenic-promoter
chr2	28611217	28611218	chr2	28909108	28909109	intronic-intronic
chr2	29055899	29055900	chr2	29360935	29360936	intronic-intronic
chr2	29673419	29673420	chr2	29666768	29666769	intergenic-exonic
chr2	30469521	30469522	chr2	30548560	30548561	intergenic-intergenic
chr2	30996214	30996215	chr2	30900974	30900975	intronic-intronic
chr2	31769968	31769969	chr2	31672414	31672415	intronic-intronic
chr2	31940496	31940497	chr2	31926637	31926638	promoter-intronic
chr2	32173353	32173354	chr2	32217083	32217084	promoter-intergenic
chr2	32344921	32344922	chr2	32422320	32422321	intergenic-intronic
chr2	3392693	3392694	chr2	3244939	3244940	promoter-intergenic
chr2	33010450	33010451	chr2	33203114	33203115	intronic-intronic
chr2	33010531	33010532	chr2	33204756	33204757	intronic-intronic
chr2	33010669	33010670	chr2	33258099	33258100	intronic-intergenic
chr2	33072466	33072467	chr2	33204531	33204532	promoter-intronic
chr2	33424846	33424847	chr2	33486499	33486500	intronic-intronic
chr2	33537879	33537880	chr2	33590534	33590535	intergenic-intronic
chr2	33602375	33602376	chr2	34278469	34278470	intronic-intronic
chr2	33828534	33828535	chr2	34260874	34260875	intergenic-intergenic
chr2	35153732	35153733	chr2	35228804	35228805	intronic-intergenic
chr2	35437143	35437144	chr2	35469000	35469001	intronic-intronic
chr2	35905067	35905068	chr2	35888624	35888625	promoter-intergenic
chr2	37828516	37828517	chr2	38142912	38142913	intronic-promoter
chr2	37923240	37923241	chr2	37943621	37943622	intronic-intronic
chr2	38782854	38782855	chr2	38853770	38853771	promoter-promoter
chr2	3938804	3938805	chr2	4247616	4247617	promoter-intronic
chr2	4219784	4219785	chr2	4354929	4354930	intronic-intronic
chr2	45025800	45025801	chr2	45910046	45910047	intergenic-intergenic
chr2	45267458	45267459	chr2	45212916	45212917	intergenic-intergenic
chr2	4838905	4838906	chr2	4693563	4693564	intergenic-intronic
chr2	49620321	49620322	chr2	49066478	49066479	intronic-intronic
chr2	49304208	49304209	chr2	49587578	49587579	intergenic-intronic
chr2	49306793	49306794	chr2	49582856	49582857	promoter-intronic
chr2	4946417	4946418	chr2	5061225	5061226	intronic-intronic
chr2	52601847	52601848	chr2	52478277	52478278	promoter-intronic
chr2	56969283	56969284	chr2	57043265	57043266	intronic-intergenic
chr2	57882070	57882071	chr2	58267601	58267602	intronic-intergenic
chr2	58520262	58520263	chr2	57906255	57906256	intronic-intergenic
chr2	58999669	58999670	chr2	59255188	59255189	promoter-intergenic
chr2	59276116	59276117	chr2	59212188	59212189	intergenic-intergenic
chr2	59379731	59379732	chr2	59446516	59446517	intergenic-intergenic
chr2	59379982	59379983	chr2	59593361	59593362	intergenic-intronic
chr2	59451154	59451155	chr2	59489838	59489839	intronic-intronic
chr2	59560002	59560003	chr2	59529064	59529065	intronic-intronic
chr2	6141856	6141857	chr2	6380695	6380696	intronic-intergenic
chr2	61506498	61506499	chr2	61653244	61653245	intergenic-intergenic
chr2	64011256	64011257	chr2	63932582	63932583	intergenic-intronic
chr2	66095093	66095094	chr2	65943216	65943217	promoter-intronic
chr2	70396430	70396431	chr2	70026690	70026691	intergenic-intronic
chr2	72818576	72818577	chr2	72476329	72476330	promoter-intergenic
chr2	73267058	73267059	chr2	72983053	72983054	intergenic-intronic
chr2	73404972	73404973	chr2	73330493	73330494	exonic-intronic
chr2	73904759	73904760	chr2	74512002	74512003	intergenic-intergenic
chr2	73906281	73906282	chr2	74494134	74494135	intergenic-exonic
chr2	74300185	74300186	chr2	74456021	74456022	intergenic-intergenic
chr2	74540403	74540404	chr2	75152360	75152361	intergenic-intergenic
chr2	74545935	74545936	chr2	74973268	74973269	intergenic-intergenic
chr2	74553210	74553211	chr2	74789797	74789798	promoter-intergenic
chr2	74802494	74802495	chr2	74869923	74869924	intergenic-intergenic
chr2	75353577	75353578	chr2	75187192	75187193	intergenic-intergenic
chr2	75329592	75329593	chr2	75299837	75299838	intergenic-intronic
chr2	75624303	75624304	chr2	75803274	75803275	intergenic-intergenic
chr2	76704969	76704970	chr2	76514498	76514499	intronic-intronic
chr2	77180238	77180239	chr2	77413624	77413625	intergenic-intronic
chr2	84578930	84578931	chr2	84599385	84599386	intergenic-intergenic
chr2	91784603	91784604	chr2	91848597	91848598	exonic-intronic
chr2	92827340	92827341	chr2	92812346	92812347	intronic-intergenic
chr2	93173630	93173631	chr2	93058595	93058596	intronic-intronic
chr2	93315329	93315330	chr2	93379411	93379412	intergenic-intergenic
chr2	94131000	94131001	chr2	93895197	93895198	intergenic-intronic
chr3	100226678	100226679	chr3	100295188	100295189	intergenic-intergenic
chr3	100802696	100802697	chr3	100872597	100872598	intronic-intronic
chr3	101610173	101610174	chr3	101403597	101403598	intergenic-intronic
chr3	101701015	101701016	chr3	101809074	101809075	promoter-intergenic
chr3	104315475	104315476	chr3	104479703	104479704	promoter-intergenic
chr3	107269905	107269906	chr3	107416050	107416051	intergenic-exonic
chr3	107563378	107563379	chr3	107667064	107667065	promoter-intergenic
chr3	113735708	113735709	chr3	113361547	113361548	intronic-intergenic
chr3	121129734	121129735	chr3	121136750	121136751	promoter-intronic
chr3	121239042	121239043	chr3	121425562	121425563	intergenic-promoter
chr3	122212327	122212328	chr3	122304400	122304401	intronic-intronic
chr3	122350890	122350891	chr3	122606998	122606999	intergenic-intronic
chr3	122863374	122863375	chr3	123025727	123025728	intronic-intronic
chr3	128040115	128040116	chr3	127811508	127811509	intergenic-intergenic
chr3	129526406	129526407	chr3	129008942	129008943	promoter-intronic
chr3	129010970	129010971	chr3	129390388	129390389	intronic-intronic
chr3	130598937	130598938	chr3	130737435	130737436	intergenic-intergenic
chr3	131870661	131870662	chr3	132154026	132154027	intergenic-intergenic
chr3	133539478	133539479	chr3	133417374	133417375	intergenic-intergenic
chr3	137415611	137415612	chr3	137065833	137065834	intergenic-intronic
chr3	137860943	137860944	chr3	138680679	138680680	intergenic-intronic
chr3	141526276	141526277	chr3	141938166	141938167	intronic-intronic
chr3	142407184	142407185	chr3	142428227	142428228	exonic-promoter
chr3	143861884	143861885	chr3	143806546	143806547	intronic-intergenic
chr3	144116794	144116795	chr3	144357739	144357740	intronic-intronic
chr3	14886778	14886779	chr3	15118846	15118847	promoter-intergenic
chr3	152138185	152138186	chr3	152396838	152396839	intronic-intronic
chr3	153567406	153567407	chr3	153933020	153933021	intronic-exonic
chr3	154316120	154316121	chr3	154751327	154751328	intergenic-intronic
chr3	157380385	157380386	chr3	157229005	157229006	intergenic-promoter
chr3	157380493	157380494	chr3	157234305	157234306	intergenic-intronic
chr3	21834988	21834989	chr3	21975673	21975674	intergenic-promoter
chr3	30117850	30117851	chr3	30388394	30388395	intronic-intronic
chr3	31045359	31045360	chr3	31502331	31502332	intergenic-intergenic
chr3	32087540	32087541	chr3	31831465	31831466	intronic-intronic
chr3	33818578	33818579	chr3	33812186	33812187	intergenic-intergenic
chr3	33855762	33855763	chr3	34582239	34582240	intergenic-intergenic
chr3	34229901	34229902	chr3	34296432	34296433	intergenic-intergenic
chr3	37313572	37313573	chr3	37254188	37254189	intronic-intronic
chr3	38159919	38159920	chr3	38270394	38270395	intergenic-intergenic
chr3	39897144	39897145	chr3	40019288	40019289	intergenic-intergenic
chr3	51456424	51456425	chr3	51501609	51501610	intergenic-exonic
chr3	51505407	51505408	chr3	51782995	51782996	intronic-intronic
chr3	52046604	52046605	chr3	51656227	51656228	intergenic-intronic
chr3	51909176	51909177	chr3	51983741	51983742	promoter-promoter
chr3	51909314	51909315	chr3	51998330	51998331	promoter-intergenic
chr3	52072311	52072312	chr3	52155047	52155048	promoter-intergenic
chr3	52073253	52073254	chr3	52603113	52603114	promoter-intergenic
chr3	52833753	52833754	chr3	53295194	53295195	intergenic-intronic
chr3	52837493	52837494	chr3	53259051	53259052	intergenic-intronic
chr3	55346468	55346469	chr3	55372569	55372570	intergenic-intergenic
chr3	57651942	57651943	chr3	58494582	58494583	promoter-intronic
chr3	57942960	57942961	chr3	57962671	57962672	intergenic-intronic
chr3	58787450	58787451	chr3	58677537	58677538	intergenic-intronic
chr3	65867803	65867804	chr3	66025611	66025612	intronic-intronic
chr3	66212430	66212431	chr3	66381271	66381272	intergenic-intergenic
chr3	67849976	67849977	chr3	67856828	67856829	intronic-intronic
chr3	69227409	69227410	chr3	69266988	69266989	intronic-intronic
chr3	69664888	69664889	chr3	69567596	69567597	intergenic-intergenic
chr3	82169792	82169793	chr3	82299926	82299927	intronic-intergenic
chr3	83077864	83077865	chr3	83634738	83634739	intergenic-intergenic
chr3	83091024	83091025	chr3	83570502	83570503	intergenic-promoter
chr3	83806765	83806766	chr3	83839687	83839688	intronic-intronic
chr3	83959780	83959781	chr3	83876279	83876280	promoter-intergenic
chr3	84387779	84387780	chr3	84420047	84420048	intronic-intronic
chr3	86186985	86186986	chr3	86154257	86154258	intronic-exonic
chr3	86559036	86559037	chr3	86472229	86472230	intronic-intronic
chr3	86834869	86834870	chr3	87549427	87549428	intergenic-exonic
chr3	86836656	86836657	chr3	86980310	86980311	intergenic-intergenic
chr3	86894133	86894134	chr3	87047689	87047690	intronic-intergenic
chr3	87366917	87366918	chr3	87506072	87506073	intergenic-intronic
chr3	88282302	88282303	chr3	89062030	89062031	intergenic-intergenic
chr3	89182915	89182916	chr3	89265728	89265729	exonic-intronic
chr3	89534378	89534379	chr3	89306809	89306810	promoter-intergenic
chr3	89588087	89588088	chr3	89579833	89579834	intergenic-intronic
chr3	8958106	8958107	chr3	9368444	9368445	intronic-intergenic
chr3	90390107	90390108	chr3	90434341	90434342	intergenic-intergenic
chr3	9064848	9064849	chr3	9682274	9682275	intronic-intergenic
chr3	94247034	94247035	chr3	94261307	94261308	promoter-intergenic
chr3	94706902	94706903	chr3	94675846	94675847	intergenic-intronic
chr3	95769822	95769823	chr3	95856169	95856170	intergenic-intronic
chr3	96088545	96088546	chr3	96135439	96135440	intronic-intergenic
chr3	9608855	9608856	chr3	9698616	9698617	intronic-intronic
chr3	96501673	96501674	chr3	96105329	96105330	promoter-intergenic
chr3	96207499	96207500	chr3	96243909	96243910	intergenic-intronic
chr3	96350571	96350572	chr3	96384591	96384592	intergenic-intronic
chr3	96501018	96501019	chr3	96398258	96398259	promoter-promoter
chr3	96500348	96500349	chr3	96456113	96456114	promoter-exonic
chr3	96742783	96742784	chr3	96896154	96896155	intergenic-intergenic
chr3	97817197	97817198	chr3	97744681	97744682	promoter-intronic
chr3	9833570	9833571	chr3	9795140	9795141	promoter-intronic
chr3	99470305	99470306	chr3	99454303	99454304	intergenic-intergenic
chr4	100660477	100660478	chr4	100373933	100373934	intronic-intergenic
chr4	100395443	100395444	chr4	100660922	100660923	intergenic-intronic
chr4	100818933	100818934	chr4	101050524	101050525	intronic-intronic
chr4	102102227	102102228	chr4	101989722	101989723	intronic-intronic
chr4	102157659	102157660	chr4	102397815	102397816	intronic-intergenic
chr4	102986407	102986408	chr4	102936616	102936617	promoter-intronic
chr4	104824893	104824894	chr4	105814978	105814979	intergenic-intergenic
chr4	105587645	105587646	chr4	105964230	105964231	intergenic-intergenic
chr4	105989744	105989745	chr4	105996366	105996367	promoter-intronic
chr4	106472967	106472968	chr4	106617519	106617520	promoter-intronic
chr4	106516059	106516060	chr4	106582556	106582557	intergenic-intergenic
chr4	106582039	106582040	chr4	106761205	106761206	intergenic-intergenic
chr4	106699962	106699963	chr4	106765295	106765296	intronic-intergenic
chr4	106836898	106836899	chr4	106851175	106851176	intronic-promoter
chr4	107310498	107310499	chr4	107351420	107351421	intergenic-intronic
chr4	107346797	107346798	chr4	107365248	107365249	intergenic-intergenic
chr4	108012211	108012212	chr4	108152331	108152332	exonic-exonic
chr4	108079588	108079589	chr4	108189303	108189304	promoter-intronic
chr4	108542665	108542666	chr4	108673213	108673214	intergenic-promoter
chr4	109177715	109177716	chr4	109373587	109373588	intergenic-intronic
chr4	114494635	114494636	chr4	114360856	114360857	promoter-intergenic
chr4	114516191	114516192	chr4	114361280	114361281	intronic-intergenic
chr4	114589799	114589800	chr4	114620232	114620233	exonic-intergenic
chr4	116793942	116793943	chr4	116717537	116717538	intronic-intronic
chr4	116874493	116874494	chr4	116940197	116940198	intergenic-intronic
chr4	116940148	116940149	chr4	117353724	117353725	intronic-intronic
chr4	117200557	117200558	chr4	117086644	117086645	intergenic-intronic
chr4	117378181	117378182	chr4	117443679	117443680	intergenic-intergenic
chr4	117502381	117502382	chr4	117555214	117555215	intergenic-promoter
chr4	118111062	118111063	chr4	118102373	118102374	intergenic-promoter
chr4	11841991	11841992	chr4	11819368	11819369	intergenic-intergenic
chr4	123212294	123212295	chr4	123265972	123265973	intronic-intronic
chr4	123819514	123819515	chr4	123856154	123856155	intergenic-intergenic
chr4	126927368	126927369	chr4	126996978	126996979	intergenic-intergenic
chr4	127001727	127001728	chr4	126928521	126928522	intergenic-intergenic
chr4	129220021	129220022	chr4	129261950	129261951	promoter-intergenic
chr4	129866105	129866106	chr4	129763310	129763311	intergenic-intronic
chr4	129866463	129866464	chr4	129782048	129782049	intergenic-intergenic
chr4	129876473	129876474	chr4	129969633	129969634	intergenic-intergenic
chr4	130516130	130516131	chr4	130987338	130987339	intergenic-intergenic
chr4	131902644	131902645	chr4	131766972	131766973	promoter-intronic
chr4	131830470	131830471	chr4	131901762	131901763	promoter-promoter
chr4	13192775	13192776	chr4	13292064	13292065	intergenic-intergenic
chr4	132312786	132312787	chr4	132399147	132399148	promoter-promoter
chr4	132501195	132501196	chr4	132565152	132565153	intergenic-intergenic
chr4	132565493	132565494	chr4	132612734	132612735	intergenic-intronic
chr4	132567973	132567974	chr4	132612658	132612659	promoter-intronic
chr4	132765539	132765540	chr4	132693870	132693871	exonic-intronic
chr4	134501914	134501915	chr4	134876655	134876656	intergenic-exonic
chr4	135626122	135626123	chr4	135716288	135716289	intergenic-intergenic
chr4	135626159	135626160	chr4	135756076	135756077	intergenic-intergenic
chr4	135626309	135626310	chr4	135706545	135706546	intergenic-intergenic
chr4	135756030	135756031	chr4	135764038	135764039	intergenic-intronic
chr4	136252617	136252618	chr4	136397099	136397100	intronic-intergenic
chr4	136391939	136391940	chr4	136386379	136386380	promoter-intronic
chr4	137882300	137882301	chr4	137985708	137985709	promoter-intergenic
chr4	138641797	138641798	chr4	138845106	138845107	intronic-intronic
chr4	138647090	138647091	chr4	138806773	138806774	intronic-intronic
chr4	138807935	138807936	chr4	138768214	138768215	intronic-intronic
chr4	139026508	139026509	chr4	139167631	139167632	intronic-intronic
chr4	139192435	139192436	chr4	139028806	139028807	intronic-intronic
chr4	139179753	139179754	chr4	139065549	139065550	promoter-intergenic
chr4	139428703	139428704	chr4	139422049	139422050	intergenic-intergenic
chr4	140458628	140458629	chr4	140281479	140281480	intergenic-intergenic
chr4	141413758	141413759	chr4	141639731	141639732	intergenic-promoter
chr4	141561508	141561509	chr4	141654301	141654302	intronic-intergenic
chr4	141561681	141561682	chr4	141641030	141641031	intronic-promoter
chr4	142470497	142470498	chr4	141711703	141711704	intronic-intronic
chr4	141804529	141804530	chr4	141948582	141948583	intergenic-intergenic
chr4	147488949	147488950	chr4	147538469	147538470	intronic-exonic
chr4	148186965	148186966	chr4	148282563	148282564	intronic-intronic
chr4	149086439	149086440	chr4	148980589	148980590	intergenic-intronic
chr4	149126961	149126962	chr4	149174767	149174768	intronic-intergenic
chr4	149330114	149330115	chr4	149167715	149167716	promoter-intergenic
chr4	149331813	149331814	chr4	149178152	149178153	intergenic-intergenic
chr4	149180913	149180914	chr4	149332715	149332716	intergenic-intergenic
chr4	149181504	149181505	chr4	149315673	149315674	intergenic-intronic
chr4	149250464	149250465	chr4	149280740	149280741	intergenic-exonic
chr4	149294729	149294730	chr4	149264245	149264246	intronic-intergenic
chr4	149353673	149353674	chr4	149343193	149343194	exonic-intergenic
chr4	149354713	149354714	chr4	149382385	149382386	exonic-promoter
chr4	151657427	151657428	chr4	151865566	151865567	exonic-intronic
chr4	151809577	151809578	chr4	151721325	151721326	intronic-intronic
chr4	152855532	152855533	chr4	152608977	152608978	intronic-intergenic
chr4	152858429	152858430	chr4	153181533	153181534	intergenic-intergenic
chr4	153439587	153439588	chr4	153664429	153664430	intronic-intronic
chr4	153581804	153581805	chr4	153575433	153575434	intronic-intronic
chr4	153767731	153767732	chr4	153706921	153706922	intronic-intronic
chr4	154124414	154124415	chr4	153838859	153838860	intergenic-intronic
chr4	153847547	153847548	chr4	153969964	153969965	intronic-intronic
chr4	153866340	153866341	chr4	154006272	154006273	intronic-exonic
chr4	154007763	154007764	chr4	153870886	153870887	exonic-intronic
chr4	153915031	153915032	chr4	154100729	154100730	intronic-intergenic
chr4	154045348	154045349	chr4	154028736	154028737	intergenic-intergenic
chr4	154507806	154507807	chr4	154608660	154608661	intronic-intergenic
chr4	154623382	154623383	chr4	154682135	154682136	promoter-intronic
chr4	31784888	31784889	chr4	31914648	31914649	intergenic-intergenic
chr4	32657877	32657878	chr4	32230021	32230022	promoter-intergenic
chr4	32390935	32390936	chr4	32438211	32438212	intronic-intronic
chr4	3902423	3902424	chr4	4058265	4058266	intergenic-intergenic
chr4	40248234	40248235	chr4	40627707	40627708	intergenic-intergenic
chr4	41416499	41416500	chr4	41500208	41500209	intronic-intronic
chr4	43419612	43419613	chr4	43128769	43128770	promoter-intronic
chr4	43512356	43512357	chr4	43543570	43543571	promoter-intergenic
chr4	43512586	43512587	chr4	43643809	43643810	promoter-promoter
chr4	45293189	45293190	chr4	45211071	45211072	intronic-intronic
chr4	46215044	46215045	chr4	46331371	46331372	intergenic-intergenic
chr4	47033939	47033940	chr4	47050592	47050593	intronic-intronic
chr4	53171874	53171875	chr4	53160508	53160509	promoter-intronic
chr4	55253143	55253144	chr4	54326734	54326735	intergenic-intergenic
chr4	57686274	57686275	chr4	57801921	57801922	intronic-intronic
chr4	58432311	58432312	chr4	59000281	59000282	intergenic-promoter
chr4	63029763	63029764	chr4	63280698	63280699	intronic-intronic
chr4	63501665	63501666	chr4	63170100	63170101	intronic-intergenic
chr4	64787313	64787314	chr4	64940193	64940194	intronic-intronic
chr4	82908278	82908279	chr4	82949465	82949466	intronic-intronic
chr4	84321606	84321607	chr4	83555911	83555912	promoter-intergenic
chr4	85936292	85936293	chr4	85673010	85673011	intronic-intergenic
chr4	8673183	8673184	chr4	8778020	8778021	intronic-exonic
chr4	8709443	8709444	chr4	8716042	8716043	intronic-intronic
chr4	8954860	8954861	chr4	8715664	8715665	intergenic-intronic
chr4	94717361	94717362	chr4	94870331	94870332	exonic-intronic
chr4	94719969	94719970	chr4	95387096	95387097	intergenic-intronic
chr4	94721691	94721692	chr4	94984176	94984177	intergenic-intergenic
chr4	96350326	96350327	chr4	96255733	96255734	intergenic-intronic
chr4	97911115	97911116	chr4	97989164	97989165	intergenic-exonic
chr5	102636134	102636135	chr5	103143949	103143950	promoter-intronic
chr5	103132437	103132438	chr5	103304067	103304068	intronic-intronic
chr5	103132768	103132769	chr5	103504843	103504844	intronic-intronic
chr5	107718069	107718070	chr5	107521012	107521013	promoter-intergenic
chr5	107625040	107625041	chr5	107523664	107523665	intronic-intergenic
chr5	110783943	110783944	chr5	110864088	110864089	promoter-intronic
chr5	111702600	111702601	chr5	111770532	111770533	intronic-intronic
chr5	111702941	111702942	chr5	111759261	111759262	intronic-promoter
chr5	111702974	111702975	chr5	111711137	111711138	intronic-intronic
chr5	111843398	111843399	chr5	112593614	112593615	intergenic-intergenic
chr5	112157517	112157518	chr5	112190069	112190070	intergenic-promoter
chr5	112669856	112669857	chr5	112656532	112656533	intergenic-intronic
chr5	113278069	113278070	chr5	113187974	113187975	intronic-intronic
chr5	113299341	113299342	chr5	113483503	113483504	intronic-intergenic
chr5	113444168	113444169	chr5	113387023	113387024	promoter-intronic
chr5	113528489	113528490	chr5	113604186	113604187	intronic-intergenic
chr5	114182284	114182285	chr5	113987746	113987747	intergenic-intronic
chr5	114698341	114698342	chr5	114758325	114758326	intronic-intergenic
chr5	114762250	114762251	chr5	115060001	115060002	intergenic-intronic
chr5	115644256	115644257	chr5	115681230	115681231	intergenic-intergenic
chr5	115956488	115956489	chr5	116006665	116006666	promoter-intergenic
chr5	116566697	116566698	chr5	116681779	116681780	intergenic-intronic
chr5	116573609	116573610	chr5	117561486	117561487	promoter-intronic
chr5	116903725	116903726	chr5	116871692	116871693	intronic-intronic
chr5	118719559	118719560	chr5	119231819	119231820	intergenic-intergenic
chr5	118719942	118719943	chr5	118859371	118859372	intergenic-intergenic
chr5	119011128	119011129	chr5	118723220	118723221	promoter-intergenic
chr5	118815871	118815872	chr5	118924224	118924225	intergenic-intergenic
chr5	119716721	119716722	chr5	119524940	119524941	intergenic-intergenic
chr5	120136138	120136139	chr5	119984256	119984257	intergenic-intergenic
chr5	120890941	120890942	chr5	120685419	120685420	exonic-intergenic
chr5	120702811	120702812	chr5	120891080	120891081	intergenic-exonic
chr5	120972831	120972832	chr5	120995016	120995017	intronic-intronic
chr5	121054824	121054825	chr5	120983436	120983437	intronic-exonic
chr5	122539087	122539088	chr5	122279133	122279134	intergenic-intronic
chr5	125748721	125748722	chr5	125217044	125217045	intergenic-intronic
chr5	125568808	125568809	chr5	125684790	125684791	intronic-intergenic
chr5	129683448	129683449	chr5	130091501	130091502	intronic-intronic
chr5	129892145	129892146	chr5	130092020	130092021	intergenic-intronic
chr5	131632370	131632371	chr5	131895022	131895023	intronic-intergenic
chr5	131904088	131904089	chr5	131773415	131773416	intergenic-intronic
chr5	132544603	132544604	chr5	132637967	132637968	intronic-intronic
chr5	134663403	134663404	chr5	134702548	134702549	intronic-intronic
chr5	134982619	134982620	chr5	134973354	134973355	intronic-intronic
chr5	136410692	136410693	chr5	136433702	136433703	promoter-intergenic
chr5	137775322	137775323	chr5	138041507	138041508	promoter-promoter
chr5	138663582	138663583	chr5	139064336	139064337	intergenic-promoter
chr5	139839925	139839926	chr5	139981174	139981175	intronic-intergenic
chr5	140144694	140144695	chr5	140014526	140014527	intergenic-intergenic
chr5	140145386	140145387	chr5	140026102	140026103	intergenic-intergenic
chr5	140145473	140145474	chr5	140093617	140093618	intergenic-intergenic
chr5	140590807	140590808	chr5	140407875	140407876	intronic-intronic
chr5	141345124	141345125	chr5	141520343	141520344	intergenic-intergenic
chr5	141347986	141347987	chr5	142341996	142341997	intergenic-intronic
chr5	142023618	142023619	chr5	141552475	141552476	intronic-intergenic
chr5	142954680	142954681	chr5	143529062	143529063	intergenic-intronic
chr5	143575570	143575571	chr5	143550729	143550730	intronic-intronic
chr5	144378912	144378913	chr5	144415391	144415392	intergenic-intronic
chr5	149643213	149643214	chr5	149890850	149890851	intergenic-intergenic
chr5	150087077	150087078	chr5	150123506	150123507	intronic-intergenic
chr5	150098943	150098944	chr5	150134574	150134575	promoter-intergenic
chr5	150155889	150155890	chr5	150115590	150115591	intergenic-intergenic
chr5	21146586	21146587	chr5	21098538	21098539	intronic-intronic
chr5	24103267	24103268	chr5	24001709	24001710	intronic-intronic
chr5	24256716	24256717	chr5	24191778	24191779	intergenic-promoter
chr5	24926471	24926472	chr5	24762088	24762089	intronic-intronic
chr5	26608975	26608976	chr5	26784773	26784774	intergenic-intergenic
chr5	26609162	26609163	chr5	27362818	27362819	intergenic-intronic
chr5	29716384	29716385	chr5	29756283	29756284	intergenic-intergenic
chr5	30341303	30341304	chr5	30397583	30397584	intronic-intronic
chr5	30940327	30940328	chr5	30895915	30895916	intergenic-intronic
chr5	31012363	31012364	chr5	31077554	31077555	intergenic-intronic
chr5	31597171	31597172	chr5	31777377	31777378	exonic-intronic
chr5	34296940	34296941	chr5	34338276	34338277	intergenic-promoter
chr5	34552965	34552966	chr5	34985839	34985840	intronic-intronic
chr5	36202031	36202032	chr5	35701398	35701399	intronic-intergenic
chr5	35938643	35938644	chr5	36044998	36044999	intronic-intronic
chr5	36634168	36634169	chr5	36741802	36741803	intronic-intergenic
chr5	37227972	37227973	chr5	37306974	37306975	intergenic-intronic
chr5	37689870	37689871	chr5	38108955	38108956	intergenic-promoter
chr5	38477101	38477102	chr5	38392572	38392573	intronic-intergenic
chr5	38430743	38430744	chr5	38477461	38477462	promoter-intronic
chr5	38953284	38953285	chr5	38869331	38869332	promoter-intronic
chr5	39023209	39023210	chr5	38923366	38923367	intergenic-intronic
chr5	38972280	38972281	chr5	39079567	39079568	intergenic-intergenic
chr5	4264297	4264298	chr5	4994883	4994884	intergenic-intronic
chr5	44064022	44064023	chr5	44228767	44228768	promoter-exonic
chr5	45313747	45313748	chr5	45106001	45106002	intergenic-intronic
chr5	64774620	64774621	chr5	64970646	64970647	intergenic-intergenic
chr5	68147621	68147622	chr5	68256787	68256788	intronic-intronic
chr5	68147666	68147667	chr5	68456285	68456286	intronic-intronic
chr5	73525209	73525210	chr5	74067543	74067544	intronic-intronic
chr5	73823122	73823123	chr5	73797793	73797794	exonic-promoter
chr5	74245300	74245301	chr5	74681244	74681245	intergenic-intronic
chr5	74590743	74590744	chr5	74615817	74615818	promoter-intronic
chr5	76267238	76267239	chr5	76547509	76547510	intergenic-intergenic
chr5	77088078	77088079	chr5	77202963	77202964	intergenic-intronic
chr5	93154465	93154466	chr5	93115418	93115419	intronic-intronic
chr5	93562610	93562611	chr5	93434553	93434554	intronic-intergenic
chr5	98460108	98460109	chr5	98596678	98596679	promoter-intergenic
chr5	99680430	99680431	chr5	99941996	99941997	intronic-intronic
chr6	100286884	100286885	chr6	100364897	100364898	intergenic-intergenic
chr6	100513211	100513212	chr6	100386167	100386168	intergenic-intergenic
chr6	113711769	113711770	chr6	113824788	113824789	intronic-intronic
chr6	115753395	115753396	chr6	115726494	115726495	intronic-intronic
chr6	116908675	116908676	chr6	117035682	117035683	intergenic-intergenic
chr6	118798306	118798307	chr6	119094170	119094171	intronic-intronic
chr6	118934553	118934554	chr6	119057675	119057676	intronic-promoter
chr6	124666975	124666976	chr6	124691212	124691213	intergenic-promoter
chr6	124868806	124868807	chr6	124881233	124881234	promoter-promoter
chr6	125368826	125368827	chr6	125328186	125328187	intergenic-intronic
chr6	125571103	125571104	chr6	126431535	126431536	intronic-intergenic
chr6	125818646	125818647	chr6	125726569	125726570	intronic-intronic
chr6	125818855	125818856	chr6	125737117	125737118	intronic-intronic
chr6	127233264	127233265	chr6	127274153	127274154	intergenic-intergenic
chr6	127280219	127280220	chr6	127234513	127234514	intergenic-intergenic
chr6	127568908	127568909	chr6	127544576	127544577	intronic-intronic
chr6	127804275	127804276	chr6	127838386	127838387	intergenic-promoter
chr6	128749699	128749700	chr6	128789750	128789751	intronic-intergenic
chr6	129510135	129510136	chr6	130001808	130001809	intergenic-intronic
chr6	13198616	13198617	chr6	13993564	13993565	intergenic-intronic
chr6	133656875	133656876	chr6	133826288	133826289	intergenic-intergenic
chr6	134557780	134557781	chr6	134514113	134514114	intergenic-intronic
chr6	135200001	135200002	chr6	135327720	135327721	intronic-intronic
chr6	135395017	135395018	chr6	136018614	136018615	intergenic-intronic
chr6	135476559	135476560	chr6	136130800	136130801	intergenic-intergenic
chr6	136067428	136067429	chr6	136242141	136242142	intronic-intergenic
chr6	13789515	13789516	chr6	13969395	13969396	promoter-intronic
chr6	142506811	142506812	chr6	142683863	142683864	intergenic-intergenic
chr6	144159511	144159512	chr6	144763780	144763781	intronic-intergenic
chr6	144763481	144763482	chr6	144503892	144503893	intergenic-intronic
chr6	145136040	145136041	chr6	145040926	145040927	exonic-intergenic
chr6	145198904	145198905	chr6	145296399	145296400	promoter-intergenic
chr6	145290342	145290343	chr6	145770950	145770951	intergenic-intergenic
chr6	145918105	145918106	chr6	145813998	145813999	intergenic-promoter
chr6	146450884	146450885	chr6	146583088	146583089	promoter-promoter
chr6	146773658	146773659	chr6	147045128	147045129	intronic-intronic
chr6	15671416	15671417	chr6	15792118	15792119	promoter-intergenic
chr6	22444088	22444089	chr6	22073536	22073537	intergenic-intronic
chr6	28085993	28085994	chr6	28033119	28033120	promoter-intronic
chr6	28212483	28212484	chr6	28369964	28369965	promoter-intronic
chr6	29148700	29148701	chr6	28985007	28985008	intergenic-intergenic
chr6	29803500	29803501	chr6	30308207	30308208	promoter-intergenic
chr6	30498993	30498994	chr6	30463669	30463670	intronic-intronic
chr6	30585183	30585184	chr6	30685107	30685108	intergenic-intronic
chr6	31475482	31475483	chr6	31925807	31925808	intronic-intergenic
chr6	32541345	32541346	chr6	32274806	32274807	intergenic-intronic
chr6	34499254	34499255	chr6	34679080	34679081	intergenic-intronic
chr6	34661391	34661392	chr6	34549856	34549857	intronic-intronic
chr6	35331133	35331134	chr6	35215166	35215167	intergenic-intergenic
chr6	42323228	42323229	chr6	42280460	42280461	promoter-exonic
chr6	44976770	44976771	chr6	44544126	44544127	intergenic-intergenic
chr6	46911294	46911295	chr6	46816670	46816671	intronic-intronic
chr6	4903893	4903894	chr6	4757749	4757750	intronic-intronic
chr6	48532045	48532046	chr6	48577325	48577326	intergenic-promoter
chr6	48989571	48989572	chr6	48838480	48838481	intronic-intergenic
chr6	50887147	50887148	chr6	51115417	51115418	intergenic-intergenic
chr6	51123578	51123579	chr6	51137420	51137421	intergenic-intergenic
chr6	51806732	51806733	chr6	51550870	51550871	intergenic-intergenic
chr6	51958981	51958982	chr6	52155148	52155149	intronic-promoter
chr6	51959112	51959113	chr6	52161826	52161827	intronic-intronic
chr6	52204491	52204492	chr6	52549973	52549974	intergenic-intronic
chr6	52746450	52746451	chr6	52723288	52723289	intronic-intronic
chr6	52869303	52869304	chr6	52888094	52888095	intronic-intronic
chr6	53402420	53402421	chr6	53424688	53424689	intronic-intronic
chr6	53402652	53402653	chr6	53492733	53492734	intronic-intronic
chr6	54571432	54571433	chr6	54621396	54621397	intronic-intergenic
chr6	54655667	54655668	chr6	54867275	54867276	intergenic-intergenic
chr6	59433959	59433960	chr6	59527291	59527292	intergenic-intergenic
chr6	61251958	61251959	chr6	60914315	60914316	intronic-intronic
chr6	6407902	6407903	chr6	6339922	6339923	intergenic-intergenic
chr6	67109020	67109021	chr6	66914443	66914444	intronic-intronic
chr6	6831235	6831236	chr6	6714178	6714179	promoter-intergenic
chr6	71349137	71349138	chr6	71444498	71444499	promoter-promoter
chr6	72139276	72139277	chr6	72167148	72167149	intergenic-intronic
chr6	72890641	72890642	chr6	73177779	73177780	intergenic-intergenic
chr6	7683115	7683116	chr6	7766173	7766174	intergenic-intergenic
chr6	83678594	83678595	chr6	83661812	83661813	intronic-promoter
chr6	85110528	85110529	chr6	85370800	85370801	intergenic-intergenic
chr6	86388578	86388579	chr6	86476722	86476723	promoter-promoter
chr6	86423095	86423096	chr6	86495966	86495967	intronic-intronic
chr6	87051267	87051268	chr6	87183498	87183499	intergenic-intronic
chr6	87463657	87463658	chr6	87423093	87423094	intronic-intronic
chr6	87837640	87837641	chr6	87948094	87948095	promoter-intergenic
chr6	88139525	88139526	chr6	88449714	88449715	intergenic-intergenic
chr6	88735650	88735651	chr6	88781400	88781401	intronic-intergenic
chr6	88777080	88777081	chr6	88764309	88764310	exonic-intronic
chr6	89503083	89503084	chr6	89511400	89511401	intronic-intronic
chr6	90747413	90747414	chr6	90938823	90938824	intronic-intergenic
chr6	91123717	91123718	chr6	91227823	91227824	exonic-intergenic
chr6	91726681	91726682	chr6	91929156	91929157	intronic-promoter
chr6	9184573	9184574	chr6	9466073	9466074	intronic-intergenic
chr6	93607645	93607646	chr6	93935385	93935386	intergenic-intronic
chr6	94089961	94089962	chr6	93780606	93780607	intronic-intronic
chr6	94029644	94029645	chr6	94193948	94193949	intronic-intronic
chr6	95048658	95048659	chr6	95166972	95166973	intergenic-intergenic
chr6	96067236	96067237	chr6	96943841	96943842	intronic-intronic
chr6	98055168	98055169	chr6	98994375	98994376	intergenic-intronic
chr6	98055423	98055424	chr6	98070609	98070610	intergenic-intergenic
chr6	99573752	99573753	chr6	99523736	99523737	intergenic-intergenic
chr6	99949343	99949344	chr6	100276360	100276361	intergenic-intergenic
chr7	104064872	104064873	chr7	103184094	103184095	intronic-intergenic
chr7	103361767	103361768	chr7	103897698	103897699	intronic-intronic
chr7	103945724	103945725	chr7	103366160	103366161	promoter-intronic
chr7	103922428	103922429	chr7	103995991	103995992	intronic-intronic
chr7	105219857	105219858	chr7	105289470	105289471	intronic-intronic
chr7	105457400	105457401	chr7	105308647	105308648	promoter-intronic
chr7	105804089	105804090	chr7	105827293	105827294	promoter-intergenic
chr7	106300668	106300669	chr7	106320379	106320380	intergenic-intronic
chr7	106500352	106500353	chr7	106509806	106509807	exonic-intergenic
chr7	107855786	107855787	chr7	107870942	107870943	promoter-intronic
chr7	108985712	108985713	chr7	108911573	108911574	promoter-intronic
chr7	114804832	114804833	chr7	114882143	114882144	intronic-exonic
chr7	116282948	116282949	chr7	116314191	116314192	intronic-promoter
chr7	119533539	119533540	chr7	120312037	120312038	intronic-intergenic
chr7	120275726	120275727	chr7	119552307	119552308	intronic-intronic
chr7	119886923	119886924	chr7	119899923	119899924	intronic-intronic
chr7	122066193	122066194	chr7	122377467	122377468	intergenic-intergenic
chr7	122510412	122510413	chr7	122377341	122377342	intergenic-intergenic
chr7	123467378	123467379	chr7	123385508	123385509	intergenic-intronic
chr7	126167897	126167898	chr7	126660325	126660326	intergenic-intronic
chr7	127268376	127268377	chr7	127347503	127347504	intergenic-promoter
chr7	128534926	128534927	chr7	128671553	128671554	promoter-intronic
chr7	128877730	128877731	chr7	129112548	129112549	promoter-intronic
chr7	129638376	129638377	chr7	129812387	129812388	intronic-intergenic
chr7	133233397	133233398	chr7	132860556	132860557	intergenic-intronic
chr7	133227322	133227323	chr7	132972041	132972042	intergenic-intronic
chr7	133116763	133116764	chr7	133157511	133157512	intronic-intronic
chr7	134452491	134452492	chr7	134506053	134506054	intronic-intronic
chr7	134452999	134453000	chr7	134706171	134706172	intronic-intronic
chr7	135381631	135381632	chr7	134619047	134619048	promoter-promoter
[truncated: 267 more rows]

## Sheet: Table S4
Table S4. Sm1a interactions involving known developmental enhancers from the VISTA enhancer browser (Visel et al. 2007)
ChIA-PET interaction (mm9)							VISTA element	Reporter expression
Anchor 1			Anchor 2			Interaction class
chr11	111690005	111690006	chr11	111905755	111905756	intergenic-intergenic	hs1467	limb
chr7	119964019	119964020	chr7	119969139	119969140	intronic-intronic	hs1314	midbrain, dorsal root ganglion, forebrain, limb, branchial arch
chr18	55291015	55291016	chr18	55355812	55355813	intergenic-intergenic	hs1375	neural tube, midbrain
chr11	74860764	74860765	chr11	74952959	74952960	intronic-intronic	hs924; hs1445	other; limb
chr13	28507296	28507297	chr13	28782776	28782777	intergenic-intronic	hs1335	neural tube, hindbrain, midbrain, forebrain
chr6	72166649	72166650	chr6	72617188	72617189	intronic-intronic	hs1652; mm123	limb; neural tube, limb, nose, heart
chr6	60994525	60994526	chr6	61262017	61262018	intergenic-exonic	hs1374	neural tube, hindbrain
chr11	64256348	64256349	chr11	64712417	64712418	intronic-intergenic	hs1497	facial mesenchyme
chr1	194624852	194624853	chr1	194635832	194635833	intergenic-intergenic	mm646	somite, forebrain, limb, branchial arch, nose, facial mesenchyme
chr12	119766648	119766649	chr12	120081716	120081717	intergenic-intergenic	hs844	forebrain, facial mesenchyme
chr12	88143288	88143289	chr12	88226434	88226435	intergenic-promoter	hs1466	neural tube, hindbrain, midbrain, dorsal root ganglion, forebrain, limb
chr13	119504791	119504792	chr13	119614254	119614255	promoter-intergenic	hs516	limb
chr13	14757671	14757672	chr13	15635973	15635974	intergenic-intronic	hs111	forebrain
chr13	15560403	15560404	chr13	15638895	15638896	intronic-intronic	hs1586	limb
chr13	60030551	60030552	chr13	60368987	60368988	intergenic-intergenic	hs1463	limb
chr1	41868465	41868466	chr1	42771384	42771385	intergenic-intergenic	hs1529	forebrain
chr14	77736988	77736989	chr14	78687675	78687676	intronic-intronic	hs1393	forebrain
chr15	102844590	102844591	chr15	103007563	103007564	promoter-intergenic	hs1875	neural tube
chr16	14970317	14970318	chr16	15084537	15084538	intergenic-intergenic	mm466	hindbrain, limb, branchial arch, nose, tail
chr16	29735517	29735518	chr16	29893816	29893817	intergenic-intergenic	hs1453	neural tube, forebrain, limb
chr17	12396654	12396655	chr17	12403681	12403682	intronic-intronic	mm156	other
chr18	13945896	13945897	chr18	14150022	14150023	intronic-intergenic	hs1027	hindbrain, forebrain
chr18	78408955	78408956	chr18	78433698	78433699	intronic-intronic	hs1440	hindbrain, limb, branchial arch, other
chr19	25680967	25680968	chr19	25697872	25697873	intergenic-exonic	hs112	forebrain
chr2	146297968	146297969	chr2	146785442	146785443	intronic-intronic	hs914	forebrain
chr2	4219784	4219785	chr2	4354929	4354930	intronic-intronic	mm418	other
chr2	45025800	45025801	chr2	45910046	45910047	intergenic-intergenic	hs1802	midbrain
chr2	72983053	72983054	chr2	73267058	73267059	intronic-intergenic	hs244	forebrain
chr3	99454303	99454304	chr3	99470305	99470306	intergenic-intergenic	hs1428	somite, limb
chr4	117502381	117502382	chr4	117555214	117555215	intergenic-promoter	hs1857	midbrain
chr4	153706921	153706922	chr4	153767731	153767732	intronic-intronic	hs1912	heart
chr4	154507806	154507807	chr4	154608660	154608661	intronic-intergenic	mm318	heart
chr4	32390935	32390936	chr4	32438211	32438212	intronic-intronic	mm720	hindbrain, somite, dorsal root ganglion, trigeminal V, cranial nerve
chr4	94721691	94721692	chr4	94984176	94984177	intergenic-intergenic	hs1485; mm308	limb; heart
chr4	97911115	97911116	chr4	97989164	97989165	intergenic-promoter	hs1450	neural tube, hindbrain, midbrain, forebrain
chr5	140014526	140014527	chr5	140144694	140144695	intergenic-intergenic	hs293	midbrain, forebrain, branchial arch
chr6	51550870	51550871	chr6	51806732	51806733	intergenic-intergenic	mm412	neural tube
chr6	72139276	72139277	chr6	72167148	72167149	intergenic-intronic	hs1652; mm123	limb; neural tube, limb, nose, heart
chr7	106500352	106500353	chr7	106509806	106509807	promoter-intergenic	hs1748	heart
chr7	149734975	149734976	chr7	149831042	149831043	intronic-intergenic	hs1488	hindbrain, midbrain, limb, eye
chr7	149739168	149739169	chr7	149758354	149758355	intronic-intergenic	mm47; mm50	somite, limb, branchial arch, liver; somite, limb, nose, heart, other

## Sheet: Table S5
Table S5. ChIA-PET adaptor and 3C oligo sequences
ChIA-PET ligation adaptor
5'(unphos)-GGCCCACTGACTAGT(biotin)ACTGCAGGTATCCAACxT			(x=phosphorothioate bond)
5'(phos)-GTTGGATACCTGCAGTACTAGTCAGTG
3C primers
Pitx1	oligo	HindIII fragment			digestion primer
Pitx1_1 *anchor	GCAGGAGGAGAAGGGCTCA	chr13	55926693	55940928	Pitx1_1dig	CTCTCCTGGCTCGACTCTTG
Pitx1_2	TTCCAGCTCAGGGAAACAC	chr13	55941795	55954768	Pitx1_2dig	TGCCTGTCAGTCTCTCTGATGT
Pitx1_3	CTGGGAATCCTTCCAACTGA	chr13	55954768	55967867	Pitx1_3dig	ACTCTTGAGGGATGCACTGG
Pitx1_4	acgcagactgtacccattgac	chr13	55967867	55975763	Pitx1_4dig	cacttgggattggataacctg
Pitx1_6	TCAGCCTCCTCAACATCACTAA	chr13	55991191	55993306	Pitx1_6dig	GTTCTGAGCCAATGTAACCAAA
Pitx1_7	tcagagccaaacagaataacca	chr13	55997328	56006811	Pitx1_7dig	gaaactgtgagccaggatgagt
Pitx1_8	TGAATTTGGAGACTAGAGCAGGA	chr13	56016788	56024438	Pitx1_8dig	CTCTTCCAATGCTTCCGTCTT
Pitx1_10	CACAGGCCAATTAAACTTCACA	chr13	56045979	56052268	Pitx1_10dig	CTCTGGGTAGATCGCTTCACTT
Pitx1_11	aagcatttccagtctcagtgttt	chr13	56052268	56055344	Pitx1_11dig	tataagaaagcaggctgagcaa
Pitx1_12	CAGGTACTTTAGTCACCCTCCAA	chr13	56055797	56063667	Pitx1_12dig	AGGTTGCCTTTGGCAGATAA
Pitx1_13	TGGGTCACAAATTCAACATGAC	chr13	56063667	56068381	Pitx1_13dig	GTCTATATCGCCGTCAGCAAA
Pitx1_14	CCATTCAGATGTGGCTCTCTT	chr13	56068381	56070565	Pitx1_14dig	AAGAGCTGTAGGCACCCTGA
Pitx1_15	AGGAAAGAGCCTGTTTGAGATG	chr13	56086635	56088341	Pitx1_15dig	CCAGACCACAAATGTAAGCAAA
Pitx1_16	CCAGTGTCACCTTGACCATTAC	chr13	56088341	56092850	Pitx1_16dig	AACTTCTGCTTCATCAGGCTTC
Wnt7a	oligo	EcoRI fragment			digestion primer
Wnt7a_1	AGCCATAGTGTTTGCTGAACTG	chr6	91212181	91215460	Wnt7a_1dig	GCAAGACTGGTCATGGTTGTT
Wnt7a_2	TTCCAGGAGAAGCAAGAGTTTC	chr6	91215460	91224765	Wnt7a_2dig	GAAGGGCAAAATCTTCTGGAC
Wnt7a_3	GCGCTAAGGGTTTCAGTAGAGA	chr6	91230620	91235865	Wnt7a_3dig	ATCTGGGAGTGATCCAGGTTT
Wnt7a_4	TGGTCTGGATTCATTGTGAGAC	chr6	91235865	91247025	Wnt7a_4dig	GTGTGTCCAGCAGCCTAAAGTC
Wnt7a_5	AAACATGGGCTAGAGAGCTGTG	chr6	91247025	91253956	Wnt7a_5dig	CCAGAGCTGTCACTATCATGC
Wnt7a_7	ACCAAGTGCAGTTTTAGGATGG	chr6	91280501	91286186	Wnt7a_7dig	CAGGACAGGTCTTTTGCTACCT
Wnt7a_8	GGCGGTCTTCATTAGTTTGTCT	chr6	91295286	91298989	Wnt7a_8dig	taacccagtcatctagctccag
Wnt7a_9	ACCTCAAGCAGTCCACTTTGAT	chr6	91308833	91315492	Wnt7a_9dig	GGCCTCGTCATAGCAATATTTA
Wnt7a_10	TTGCTACATGAGTAGCCCTGTC	chr6	91353505	91360653	Wnt7a_10dig	AAGCCACAAGCACAGTAGATCC
Wnt7a_11.2 *anchor	GGGCACTAGGTTTTGCAATAGT	chr6	91360653	91368202	Wnt7a_11dig	TCTTAAGAGACAATAAAACACAAGAAA
3C control primers		digestion primer
chr9.2_CTCF_F	CGCCCTCTGGTGGTAAAG	n/a
chr9.2_CTCF_R	AGAGGACCCAGAGCGTAGTC	n/a
Ercc3_1_EcoRI	TGCAGTAGTCACCCTGGTAGGT	Ercc3_1_dig_EcoRI	CAGGGAGTCATGGTCTGTATGA
Ercc3_2_EcoRI	GATTATGATTGTCAGGCCCTTC	Ercc3_2_dig_EcoRI	ATGGCCTGACAAGAGAAAGGT
Ercc3_1_HindIII	TGACCTCCACACTCCTGAC	Ercc3_1_dig_HindIII	CAAGCCAGGTGTTACTGAGAAG
Ercc3_2_HindIII	ATGCGCAATTAGAAACTGC	Ercc3_2_dig_HindIII	GACACAAACTCAGGCAAAGATG

## Sheet: Table S6
Table S6. Predicted CTCF motif positions in mm9 genome
chr	start	stop
chr1	3008169	3008181
chr1	3053480	3053498
chr1	3058240	3058252
chr1	3103795	3103807
chr1	3113670	3113687
chr1	3132792	3132804
chr1	3133926	3133938
chr1	3146011	3146023
chr1	3156633	3156650
chr1	3186569	3186581
chr1	3222741	3222753
chr1	3263503	3263515
chr1	3265132	3265144
chr1	3294674	3294686
chr1	3337583	3337595
chr1	3347353	3347371
chr1	3369881	3369893
chr1	3438400	3438412
chr1	3443072	3443089
chr1	3446147	3446159
chr1	3573229	3573246
chr1	3641600	3641612
chr1	3662405	3662417
chr1	3666396	3666408
chr1	3694748	3694760
chr1	3702894	3702906
chr1	3727793	3727805
chr1	3759483	3759495
chr1	3818349	3818361
chr1	3831600	3831612
chr1	3839774	3839786
chr1	3883927	3883939
chr1	3916886	3916898
chr1	3952965	3952977
chr1	4022124	4022136
chr1	4059808	4059820
chr1	4140789	4140801
chr1	4163583	4163601
chr1	4192556	4192568
chr1	4215452	4215464
chr1	4218410	4218427
chr1	4234743	4234755
chr1	4242204	4242216
chr1	4245941	4245953
chr1	4261748	4261765
chr1	4277906	4277918
chr1	4287233	4287245
chr1	4319647	4319659
chr1	4322753	4322765
chr1	4336461	4336473
chr1	4359253	4359271
chr1	4363572	4363584
chr1	4373078	4373095
chr1	4393352	4393364
chr1	4406984	4407001
chr1	4428268	4428280
chr1	4433437	4433449
chr1	4466788	4466800
chr1	4468492	4468510
chr1	4506817	4506829
chr1	4570826	4570844
chr1	4594258	4594270
chr1	4614679	4614691
chr1	4659974	4659986
chr1	4704470	4704482
chr1	4721891	4721903
chr1	4748291	4748308
chr1	4758627	4758639
chr1	4760134	4760152
chr1	4763520	4763532
chr1	4769573	4769591
chr1	4770360	4770372
chr1	4773175	4773192
chr1	4773546	4773563
chr1	4804360	4804372
chr1	4814348	4814360
chr1	4819048	4819065
chr1	4826811	4826829
chr1	4830743	4830760
chr1	4831652	4831664
chr1	4833013	4833025
chr1	4839048	4839060
chr1	4856191	4856209
chr1	4862341	4862353
chr1	4867367	4867385
chr1	4882535	4882552
chr1	4896477	4896489
chr1	4904324	4904336
chr1	4911143	4911155
chr1	4921491	4921503
chr1	4926772	4926789
chr1	4940022	4940034
chr1	5008040	5008052
chr1	5008150	5008162
chr1	5009662	5009674
chr1	5061147	5061159
chr1	5069769	5069781
chr1	5076801	5076813
chr1	5089431	5089449
chr1	5096300	5096312
chr1	5128753	5128770
chr1	5146871	5146883
chr1	5173765	5173777
chr1	5182437	5182449
chr1	5189106	5189118
chr1	5242487	5242499
chr1	5260173	5260185
chr1	5313879	5313897
chr1	5416294	5416306
chr1	5460669	5460686
chr1	5468939	5468951
chr1	5474763	5474775
chr1	5575830	5575848
chr1	5628026	5628038
chr1	5659197	5659215
chr1	5666907	5666919
chr1	5672063	5672075
chr1	5717679	5717691
chr1	5784655	5784667
chr1	5806565	5806577
chr1	5815784	5815796
chr1	5830459	5830471
chr1	5843019	5843031
chr1	5857809	5857827
chr1	5862296	5862308
chr1	5905576	5905588
chr1	5959884	5959896
chr1	5964515	5964532
chr1	5964863	5964875
chr1	5971574	5971586
chr1	5986075	5986087
chr1	5999345	5999357
chr1	6003422	6003434
chr1	6019787	6019799
chr1	6030778	6030790
chr1	6073712	6073730
chr1	6074350	6074362
chr1	6075063	6075075
chr1	6079976	6079988
chr1	6099832	6099849
chr1	6106505	6106517
chr1	6125349	6125361
chr1	6132362	6132380
chr1	6132406	6132418
chr1	6142711	6142728
chr1	6147592	6147609
chr1	6152481	6152499
chr1	6155901	6155918
chr1	6156867	6156879
chr1	6165967	6165979
chr1	6181619	6181631
chr1	6185959	6185976
chr1	6188606	6188618
chr1	6194857	6194875
chr1	6198183	6198195
chr1	6199249	6199261
chr1	6201232	6201244
chr1	6214658	6214670
chr1	6223274	6223292
chr1	6262530	6262542
chr1	6272703	6272715
chr1	6288630	6288642
chr1	6310841	6310853
chr1	6320884	6320896
chr1	6327166	6327178
chr1	6331937	6331949
chr1	6337250	6337268
chr1	6357646	6357658
chr1	6358478	6358496
chr1	6367413	6367431
chr1	6372951	6372968
chr1	6391774	6391786
chr1	6396588	6396600
chr1	6400343	6400361
chr1	6403031	6403043
chr1	6408154	6408166
chr1	6410859	6410871
chr1	6417311	6417323
chr1	6428989	6429001
chr1	6479299	6479311
chr1	6505002	6505014
chr1	6524523	6524535
chr1	6543057	6543069
chr1	6563297	6563315
chr1	6600063	6600075
chr1	6637750	6637762
chr1	6641426	6641443
chr1	6644528	6644540
chr1	6716306	6716318
chr1	6811696	6811708
chr1	6849284	6849296
chr1	6859244	6859261
chr1	6885827	6885845
chr1	6895608	6895620
chr1	6939959	6939971
chr1	6946462	6946474
chr1	6952061	6952078
chr1	6968206	6968224
chr1	6987172	6987184
chr1	6987894	6987906
chr1	6988169	6988181
chr1	6996994	6997011
chr1	7000433	7000451
chr1	7006113	7006125
chr1	7007595	7007607
chr1	7022781	7022798
chr1	7028684	7028701
chr1	7036692	7036704
chr1	7064059	7064077
chr1	7072667	7072679
chr1	7089528	7089546
chr1	7093873	7093891
chr1	7095850	7095862
chr1	7102846	7102858
chr1	7107852	7107864
chr1	7121797	7121814
chr1	7131747	7131759
chr1	7140744	7140762
chr1	7171046	7171058
chr1	7183530	7183542
chr1	7195028	7195045
chr1	7209176	7209188
chr1	7211269	7211281
chr1	7227871	7227883
chr1	7241449	7241461
chr1	7253275	7253293
chr1	7264597	7264609
chr1	7275066	7275078
chr1	7297490	7297502
chr1	7340293	7340305
chr1	7350791	7350803
chr1	7355583	7355595
chr1	7387127	7387145
chr1	7387507	7387525
chr1	7388293	7388305
chr1	7388460	7388478
chr1	7426384	7426396
chr1	7466741	7466753
chr1	7471928	7471940
chr1	7484213	7484225
chr1	7560053	7560065
chr1	7596370	7596382
chr1	7605721	7605733
chr1	7610857	7610869
chr1	7652107	7652119
chr1	7667290	7667302
chr1	7671294	7671306
chr1	7686073	7686085
chr1	7759853	7759870
chr1	7836536	7836548
chr1	7922817	7922829
chr1	7932818	7932830
chr1	7933646	7933658
chr1	7939953	7939965
chr1	7975877	7975889
chr1	7994339	7994351
chr1	8060643	8060655
chr1	8096619	8096636
chr1	8099129	8099146
chr1	8235895	8235907
chr1	8277815	8277833
chr1	8310448	8310460
chr1	8359971	8359983
chr1	8383107	8383119
chr1	8411991	8412003
chr1	8427245	8427257
chr1	8480247	8480264
chr1	8502667	8502679
chr1	8514443	8514455
chr1	8536345	8536357
chr1	8575928	8575940
chr1	8589752	8589764
chr1	8628439	8628451
chr1	8657012	8657024
chr1	8673709	8673721
chr1	8699521	8699533
chr1	8705355	8705367
chr1	8718388	8718400
chr1	8747579	8747591
chr1	8750551	8750563
chr1	8758455	8758467
chr1	8762732	8762744
chr1	8827757	8827769
chr1	8846189	8846201
chr1	8846988	8847000
chr1	8847933	8847945
chr1	8874422	8874434
chr1	8893952	8893964
chr1	8915910	8915922
chr1	8939277	8939289
chr1	8944519	8944531
chr1	8975394	8975411
chr1	9000421	9000433
chr1	9005311	9005323
chr1	9023848	9023860
chr1	9051270	9051282
chr1	9091100	9091117
chr1	9132535	9132552
chr1	9133302	9133314
chr1	9180137	9180149
chr1	9213843	9213855
chr1	9233859	9233871
chr1	9241191	9241203
chr1	9256032	9256050
chr1	9312435	9312447
chr1	9344859	9344871
chr1	9376794	9376806
chr1	9432578	9432590
chr1	9453513	9453530
chr1	9459719	9459731
chr1	9467523	9467535
chr1	9471642	9471654
chr1	9481483	9481500
chr1	9507972	9507990
chr1	9523880	9523897
chr1	9535418	9535430
chr1	9539245	9539263
chr1	9553657	9553669
chr1	9556367	9556384
chr1	9556471	9556483
chr1	9559621	9559639
chr1	9563487	9563499
chr1	9563963	9563975
chr1	9602287	9602299
chr1	9611671	9611689
chr1	9615058	9615070
chr1	9637901	9637913
chr1	9681073	9681090
chr1	9681238	9681250
chr1	9683003	9683015
chr1	9684782	9684794
chr1	9685758	9685775
chr1	9686725	9686737
chr1	9693325	9693342
chr1	9697887	9697899
chr1	9701019	9701031
chr1	9702058	9702075
chr1	9706557	9706569
chr1	9715859	9715876
chr1	9719723	9719735
chr1	9719834	9719851
chr1	9728010	9728028
chr1	9730966	9730983
chr1	9731459	9731471
chr1	9744789	9744801
chr1	9752169	9752181
chr1	9752473	9752491
chr1	9763020	9763038
chr1	9764140	9764152
chr1	9777123	9777135
chr1	9779264	9779282
chr1	9780983	9781000
chr1	9798602	9798620
chr1	9805049	9805067
chr1	9811971	9811983
chr1	9831582	9831600
chr1	9836078	9836096
chr1	9858213	9858225
chr1	9869909	9869921
chr1	9884703	9884720
chr1	9887607	9887619
chr1	9895127	9895139
chr1	9905036	9905048
chr1	9908828	9908846
chr1	9919457	9919469
chr1	9922958	9922970
chr1	9924386	9924403
chr1	9925712	9925724
chr1	9929311	9929323
chr1	9931485	9931497
chr1	9935202	9935214
chr1	9937082	9937094
chr1	9940331	9940348
chr1	9942155	9942173
chr1	9944028	9944045
chr1	9948885	9948903
chr1	9975053	9975065
chr1	9977239	9977256
chr1	9980268	9980280
chr1	9980612	9980624
chr1	9991473	9991485
chr1	9997469	9997487
chr1	10001446	10001464
chr1	10018013	10018025
chr1	10025081	10025093
chr1	10025641	10025659
chr1	10073060	10073072
chr1	10074784	10074796
chr1	10079808	10079820
chr1	10095602	10095614
chr1	10104957	10104969
chr1	10118697	10118709
chr1	10158083	10158095
chr1	10163430	10163442
chr1	10169627	10169645
chr1	10172041	10172059
chr1	10187212	10187230
chr1	10196096	10196114
chr1	10197810	10197827
chr1	10211320	10211337
chr1	10214459	10214471
chr1	10219179	10219197
chr1	10234802	10234814
chr1	10234834	10234846
chr1	10234866	10234878
chr1	10234898	10234910
chr1	10253969	10253981
chr1	10289499	10289511
chr1	10303832	10303849
chr1	10311660	10311672
chr1	10316136	10316148
chr1	10323119	10323137
chr1	10371493	10371505
chr1	10388115	10388133
chr1	10398046	10398064
chr1	10415379	10415391
chr1	10451593	10451605
chr1	10478492	10478504
chr1	10522413	10522425
chr1	10525642	10525659
chr1	10563707	10563724
chr1	10597456	10597473
chr1	10597634	10597651
chr1	10608168	10608180
chr1	10633891	10633903
chr1	10659588	10659600
chr1	10749859	10749876
chr1	10752979	10752991
chr1	10762034	10762046
chr1	10780289	10780301
chr1	10807188	10807200
chr1	10812381	10812393
chr1	10822245	10822263
chr1	10823324	10823336
chr1	10825919	10825931
chr1	10827449	10827467
chr1	10877929	10877941
chr1	10883735	10883747
chr1	10901855	10901867
chr1	10947836	10947853
chr1	10970041	10970053
chr1	10994330	10994347
chr1	11041117	11041129
chr1	11062924	11062936
chr1	11130189	11130201
chr1	11189124	11189136
chr1	11201577	11201589
chr1	11207869	11207881
chr1	11224149	11224161
chr1	11251818	11251830
chr1	11262748	11262765
chr1	11307636	11307648
chr1	11309760	11309777
chr1	11333610	11333622
chr1	11335437	11335449
chr1	11365725	11365737
chr1	11376097	11376109
chr1	11449305	11449322
chr1	11449336	11449353
chr1	11456597	11456614
chr1	11475045	11475057
chr1	11485590	11485602
chr1	11517645	11517657
chr1	11526115	11526127
chr1	11538310	11538322
chr1	11574621	11574633
chr1	11609671	11609683
chr1	11614892	11614904
chr1	11647976	11647988
chr1	11766368	11766380
chr1	11786555	11786572
chr1	11893680	11893692
chr1	11915844	11915856
chr1	11953834	11953846
chr1	11959129	11959141
chr1	12018363	12018375
chr1	12020271	12020283
chr1	12035415	12035427
chr1	12060566	12060578
chr1	12068307	12068319
chr1	12089299	12089311
chr1	12096542	12096554
chr1	12147115	12147127
chr1	12162791	12162803
chr1	12257377	12257389
chr1	12272188	12272200
chr1	12338495	12338507
chr1	12367045	12367057
chr1	12380496	12380508
chr1	12433168	12433180
chr1	12444979	12444991
chr1	12524770	12524782
chr1	12525907	12525919
chr1	12541220	12541237
chr1	12617052	12617064
chr1	12618156	12618168
chr1	12625395	12625412
chr1	12632780	12632792
chr1	12655751	12655763
chr1	12689333	12689350
chr1	12691894	12691906
chr1	12695858	12695870
chr1	12705369	12705381
chr1	12707487	12707499
chr1	12723169	12723181
chr1	12753063	12753075
chr1	12775423	12775435
chr1	12779394	12779406
chr1	12787690	12787707
chr1	12789127	12789139
chr1	12809026	12809044
chr1	12824861	12824873
chr1	12827069	12827086
chr1	12851071	12851083
chr1	12854304	12854316
chr1	12879456	12879468
chr1	12903559	12903577
chr1	12926064	12926081
chr1	12926531	12926548
chr1	12980439	12980451
chr1	12982843	12982855
chr1	12984139	12984157
chr1	12990852	12990870
chr1	12991733	12991745
chr1	13004363	13004381
chr1	13006708	13006726
chr1	13008138	13008150
chr1	13016009	13016027
chr1	13018349	13018361
chr1	13020985	13020997
chr1	13027711	13027723
chr1	13028035	13028047
chr1	13031088	13031106
chr1	13040395	13040413
chr1	13041871	13041883
chr1	13044448	13044460
chr1	13045427	13045439
chr1	13048019	13048031
chr1	13050513	13050530
chr1	13061711	13061728
chr1	13063263	13063280
chr1	13069786	13069803
chr1	13071870	13071882
chr1	13078059	13078076
chr1	13079444	13079456
chr1	13105052	13105064
chr1	13108414	13108431
chr1	13115894	13115906
chr1	13124553	13124565
chr1	13135035	13135052
chr1	13141313	13141331
chr1	13168398	13168410
chr1	13170459	13170471
chr1	13180841	13180859
chr1	13200020	13200032
chr1	13217503	13217520
chr1	13220275	13220292
chr1	13243207	13243219
chr1	13246002	13246014
chr1	13253242	13253259
chr1	13254220	13254238
chr1	13259265	13259282
chr1	13279192	13279204
chr1	13306865	13306877
chr1	13314482	13314494
chr1	13318444	13318462
chr1	13327937	13327949
chr1	13327968	13327980
chr1	13328029	13328041
chr1	13328121	13328133
chr1	13328152	13328164
chr1	13328368	13328380
chr1	13328491	13328503
chr1	13328644	13328656
chr1	13329254	13329266
chr1	13334721	13334733
chr1	13341499	13341511
chr1	13345945	13345963
chr1	13356003	13356015
chr1	13367045	13367063
chr1	13393027	13393044
chr1	13398604	13398616
chr1	13410037	13410049
chr1	13414392	13414410
chr1	13417607	13417619
chr1	13433400	13433412
chr1	13435506	13435523
chr1	13449685	13449697
chr1	13459764	13459776
chr1	13461221	13461233
chr1	13462633	13462645
chr1	13467945	13467962
chr1	13474975	13474987
chr1	13488411	13488423
chr1	13490748	13490765
chr1	13502690	13502707
chr1	13504314	13504326
chr1	13513207	13513224
chr1	13517835	13517847
chr1	13521767	13521779
chr1	13526699	13526711
chr1	13580883	13580900
chr1	13614993	13615011
chr1	13633821	13633838
chr1	13650026	13650038
chr1	13687619	13687636
chr1	13693527	13693539
chr1	13696586	13696604
chr1	13715487	13715499
chr1	13757102	13757114
chr1	13774648	13774666
chr1	13779463	13779481
chr1	13800013	13800025
chr1	13805049	13805061
chr1	13805874	13805886
chr1	13808683	13808695
chr1	13817274	13817286
chr1	13829889	13829907
chr1	13840769	13840781
chr1	13884495	13884507
chr1	13923270	13923287
chr1	13974249	13974261
chr1	14021473	14021485
chr1	14052182	14052194
chr1	14078435	14078447
chr1	14083487	14083499
chr1	14123908	14123925
chr1	14127917	14127935
chr1	14146340	14146352
chr1	14168167	14168179
chr1	14286766	14286778
chr1	14318779	14318797
chr1	14321331	14321343
chr1	14378695	14378707
chr1	14383341	14383359
chr1	14435369	14435381
chr1	14463780	14463798
chr1	14469645	14469657
chr1	14473340	14473352
chr1	14489428	14489440
chr1	14579078	14579096
chr1	14592073	14592090
chr1	14628173	14628185
chr1	14671705	14671717
chr1	14676467	14676479
chr1	14719315	14719332
chr1	14730291	14730303
chr1	14742467	14742479
chr1	14757907	14757925
chr1	14852627	14852644
chr1	14863740	14863752
chr1	14908953	14908965
chr1	14956738	14956755
chr1	14962734	14962746
chr1	14985605	14985617
chr1	14997902	14997920
chr1	15007934	15007946
chr1	15027776	15027788
chr1	15033419	15033431
chr1	15039417	15039429
chr1	15047226	15047238
chr1	15077094	15077106
chr1	15197039	15197051
chr1	15241132	15241144
chr1	15317630	15317642
chr1	15319726	15319738
chr1	15357468	15357485
chr1	15372076	15372088
chr1	15378058	15378076
chr1	15395910	15395927
chr1	15423437	15423449
chr1	15430824	15430841
chr1	15437558	15437570
chr1	15443963	15443975
chr1	15455545	15455557
chr1	15470669	15470681
chr1	15484898	15484910
chr1	15515324	15515336
chr1	15550091	15550103
chr1	15564738	15564755
chr1	15566064	15566076
chr1	15604871	15604888
chr1	15612130	15612147
chr1	15612170	15612182
chr1	15617317	15617334
chr1	15634272	15634284
chr1	15676088	15676100
chr1	15682657	15682674
chr1	15689247	15689259
chr1	15689423	15689440
chr1	15697905	15697917
chr1	15709757	15709769
chr1	15719407	15719419
chr1	15743165	15743177
chr1	15747960	15747972
chr1	15759317	15759329
chr1	15782186	15782198
chr1	15784795	15784807
chr1	15788357	15788369
chr1	15791800	15791812
chr1	15797409	15797421
chr1	15809350	15809368
chr1	15810057	15810075
chr1	15824815	15824832
chr1	15865332	15865350
chr1	15879609	15879621
chr1	15886532	15886544
chr1	15889460	15889472
chr1	15892716	15892733
chr1	15921562	15921574
chr1	15949655	15949673
chr1	15958659	15958677
chr1	15964332	15964349
chr1	15968724	15968742
chr1	15976343	15976360
chr1	15983817	15983829
chr1	15997159	15997171
chr1	16003611	16003628
chr1	16009722	16009734
chr1	16023838	16023850
chr1	16028450	16028462
chr1	16029334	16029351
chr1	16052193	16052210
chr1	16052965	16052983
chr1	16055854	16055871
chr1	16058337	16058354
chr1	16065972	16065984
chr1	16081082	16081099
chr1	16085957	16085969
chr1	16089344	16089356
chr1	16095237	16095249
chr1	16095856	16095874
chr1	16099984	16100002
chr1	16105491	16105503
chr1	16106727	16106739
chr1	16146305	16146323
chr1	16150359	16150371
chr1	16191665	16191682
chr1	16209650	16209667
chr1	16215458	16215470
chr1	16253994	16254011
chr1	16273326	16273338
chr1	16295167	16295179
chr1	16297864	16297876
chr1	16335704	16335721
chr1	16349825	16349837
chr1	16378733	16378750
chr1	16392776	16392788
chr1	16401343	16401355
chr1	16414823	16414835
chr1	16423661	16423673
chr1	16426106	16426118
chr1	16430472	16430484
chr1	16437987	16437999
chr1	16438142	16438154
chr1	16454199	16454217
chr1	16457938	16457956
chr1	16481438	16481455
chr1	16504226	16504243
chr1	16509860	16509877
chr1	16511158	16511170
chr1	16528949	16528966
chr1	16530114	16530131
chr1	16544201	16544219
chr1	16546032	16546044
chr1	16568935	16568953
chr1	16573148	16573165
chr1	16574289	16574307
chr1	16592770	16592788
chr1	16603692	16603709
chr1	16606283	16606300
chr1	16614424	16614436
chr1	16622018	16622036
chr1	16624376	16624388
chr1	16626369	16626381
chr1	16628226	16628243
chr1	16636249	16636266
chr1	16636852	16636864
chr1	16655203	16655215
chr1	16658660	16658672
chr1	16661299	16661311
chr1	16687804	16687821
chr1	16691113	16691125
chr1	16707163	16707175
chr1	16715274	16715286
chr1	16720996	16721008
chr1	16738984	16738996
chr1	16751879	16751896
chr1	16764894	16764906
chr1	16788587	16788605
chr1	16825603	16825615
chr1	16855827	16855839
chr1	16863922	16863934
chr1	16885959	16885971
chr1	16915514	16915531
chr1	16916797	16916814
chr1	16940468	16940480
chr1	16975968	16975980
chr1	17004860	17004877
chr1	17009528	17009540
chr1	17044257	17044274
chr1	17131486	17131498
chr1	17153802	17153814
chr1	17167716	17167728
chr1	17183123	17183135
chr1	17224740	17224758
chr1	17269626	17269638
chr1	17281985	17281997
chr1	17296805	17296817
chr1	17338521	17338533
chr1	17349990	17350002
chr1	17380699	17380716
chr1	17428536	17428548
chr1	17472518	17472530
chr1	17530627	17530639
chr1	17545732	17545744
chr1	17552693	17552711
chr1	17564960	17564972
chr1	17571557	17571569
chr1	17619825	17619837
chr1	17625169	17625181
chr1	17626247	17626259
chr1	17658829	17658841
chr1	17663739	17663751
chr1	17673277	17673289
chr1	17680732	17680744
chr1	17697562	17697574
chr1	17746210	17746222
chr1	17753460	17753472
chr1	17773512	17773524
chr1	17775793	17775805
chr1	17778468	17778480
chr1	17782931	17782943
chr1	17883940	17883958
chr1	17891063	17891075
chr1	17901368	17901386
chr1	17924988	17925006
chr1	17940991	17941003
chr1	17946075	17946087
chr1	17962970	17962988
chr1	17970898	17970910
chr1	17975433	17975445
chr1	17991218	17991235
chr1	18000705	18000723
chr1	18003112	18003124
chr1	18003338	18003355
chr1	18005916	18005933
chr1	18011546	18011558
chr1	18039556	18039568
chr1	18047289	18047301
chr1	18096435	18096452
chr1	18097012	18097029
chr1	18100729	18100741
chr1	18108638	18108655
chr1	18113523	18113541
chr1	18121964	18121976
chr1	18128904	18128916
chr1	18133628	18133640
chr1	18158506	18158518
chr1	18197181	18197199
chr1	18239661	18239679
chr1	18259760	18259778
chr1	18260912	18260924
chr1	18279137	18279154
chr1	18280089	18280101
chr1	18290699	18290711
chr1	18321551	18321563
chr1	18347707	18347719
chr1	18350216	18350228
chr1	18374381	18374393
chr1	18385683	18385695
chr1	18401165	18401183
chr1	18421668	18421680
chr1	18457193	18457205
chr1	18461718	18461730
chr1	18626981	18626993
chr1	18640184	18640196
chr1	18651986	18651998
chr1	18721535	18721547
chr1	18733276	18733288
chr1	18733617	18733629
chr1	18807848	18807860
chr1	18823068	18823080
chr1	18875079	18875097
chr1	18881728	18881740
chr1	18966991	18967003
chr1	19023004	19023016
chr1	19037891	19037908
chr1	19042098	19042110
chr1	19046601	19046613
chr1	19049953	19049965
chr1	19072018	19072030
chr1	19140011	19140029
chr1	19166812	19166829
chr1	19169291	19169308
chr1	19179283	19179295
chr1	19180279	19180291
chr1	19190751	19190763
chr1	19195838	19195850
chr1	19212107	19212119
chr1	19237784	19237801
chr1	19254179	19254196
chr1	19280379	19280391
chr1	19313791	19313809
chr1	19320791	19320808
chr1	19331420	19331432
chr1	19351971	19351988
chr1	19359100	19359118
chr1	19362721	19362738
chr1	19381267	19381284
chr1	19407195	19407207
chr1	19410923	19410935
chr1	19441960	19441972
chr1	19457327	19457339
chr1	19485463	19485475
chr1	19537992	19538004
chr1	19560134	19560152
chr1	19567409	19567421
chr1	19586928	19586940
chr1	19598606	19598618
chr1	19606564	19606576
chr1	19626805	19626817
chr1	19669918	19669930
chr1	19708062	19708074
chr1	19718602	19718614
chr1	19767816	19767833
chr1	19773155	19773173
chr1	19773348	19773360
chr1	19792575	19792587
chr1	19802049	19802066
chr1	19804964	19804976
chr1	19926810	19926822
chr1	19937981	19937993
chr1	19955039	19955051
chr1	19957843	19957855
chr1	19986388	19986400
chr1	20016319	20016331
chr1	20022989	20023001
chr1	20089737	20089749
chr1	20107581	20107598
chr1	20140438	20140455
chr1	20162565	20162577
chr1	20194407	20194419
chr1	20205595	20205612
chr1	20218212	20218224
chr1	20222426	20222438
chr1	20280024	20280041
chr1	20301765	20301783
chr1	20324410	20324422
chr1	20352935	20352947
chr1	20416336	20416348
chr1	20417830	20417842
chr1	20440380	20440392
chr1	20474812	20474824
chr1	20503989	20504006
chr1	20534794	20534806
chr1	20544676	20544693
chr1	20544711	20544723
chr1	20555181	20555193
chr1	20573174	20573186
chr1	20588656	20588668
chr1	20602977	20602995
chr1	20604183	20604201
chr1	20614120	20614132
chr1	20635823	20635835
chr1	20656998	20657010
chr1	20678885	20678903
chr1	20685181	20685199
chr1	20724818	20724830
chr1	20741323	20741340
chr1	20752523	20752541
chr1	20765532	20765544
chr1	20770002	20770019
chr1	20779676	20779688
chr1	20791229	20791241
chr1	20791985	20791997
chr1	20804902	20804919
chr1	20808643	20808655
chr1	20821016	20821028
chr1	20822677	20822695
chr1	20828543	20828561
chr1	20842770	20842782
chr1	20847678	20847690
chr1	20899081	20899093
chr1	20915584	20915602
chr1	20919253	20919271
chr1	20933300	20933317
chr1	20948099	20948111
chr1	20954405	20954417
chr1	20964926	20964938
chr1	20966668	20966680
chr1	20971139	20971156
chr1	20988925	20988937
chr1	21008955	21008967
chr1	21080348	21080360
chr1	21091494	21091511
chr1	21118846	21118860
chr1	21127106	21127118
chr1	21128285	21128297
chr1	21152086	21152098
chr1	21156439	21156451
chr1	21161207	21161219
chr1	21175359	21175377
chr1	21193474	21193486
chr1	21203780	21203797
chr1	21208650	21208662
chr1	21208733	21208745
chr1	21226330	21226348
chr1	21238116	21238134
chr1	21240817	21240829
chr1	21257020	21257038
chr1	21261674	21261686
chr1	21261737	21261754
chr1	21265013	21265025
chr1	21266425	21266443
chr1	21267612	21267624
chr1	21271808	21271820
chr1	21298960	21298972
chr1	21301010	21301022
chr1	21304833	21304851
chr1	21312168	21312180
chr1	21321070	21321082
chr1	21324863	21324881
chr1	21325177	21325194
chr1	21328423	21328435
chr1	21334588	21334605
chr1	21344764	21344782
chr1	21345950	21345962
chr1	21346700	21346712
chr1	21354558	21354570
chr1	21363414	21363432
chr1	21364606	21364618
chr1	21365387	21365399
chr1	21367335	21367347
chr1	21369314	21369326
chr1	21374544	21374556
chr1	21384433	21384450
chr1	21386956	21386974
chr1	21394352	21394364
chr1	21401471	21401483
chr1	21407838	21407856
chr1	21409634	21409652
chr1	21414435	21414447
chr1	21415807	21415819
chr1	21439604	21439622
chr1	21450175	21450193
chr1	21450649	21450661
chr1	21451352	21451370
chr1	21512315	21512327
chr1	21516342	21516354
chr1	21576105	21576117
chr1	21595182	21595200
chr1	21744987	21744999
chr1	21766522	21766534
chr1	21866364	21866382
chr1	21937948	21937960
chr1	21945073	21945085
chr1	21951204	21951216
chr1	21951405	21951422
chr1	21957420	21957437
chr1	21972167	21972184
chr1	21973342	21973354
chr1	21978460	21978472
chr1	22036213	22036225
chr1	22055441	22055453
chr1	22071607	22071619
chr1	22085193	22085205
chr1	22106034	22106051
chr1	22119718	22119730
chr1	22125279	22125291
chr1	22127265	22127277
chr1	22131586	22131598
chr1	22203294	22203306
chr1	22252033	22252045
chr1	22257923	22257940
chr1	22259247	22259264
chr1	22365637	22365649
chr1	22366128	22366140
chr1	22367957	22367969
chr1	22376627	22376644
chr1	22399255	22399272
chr1	22494343	22494360
chr1	22504980	22504997
chr1	22544169	22544186
chr1	22547509	22547527
chr1	22611328	22611346
chr1	22633968	22633986
chr1	22653573	22653585
chr1	22666455	22666467
chr1	22666471	22666488
chr1	22678932	22678950
chr1	22690425	22690437
chr1	22705108	22705120
chr1	22741444	22741456
chr1	22763437	22763449
chr1	22774139	22774157
chr1	22840611	22840623
chr1	22944939	22944951
chr1	23014125	23014137
chr1	23066640	23066652
chr1	23069022	23069034
chr1	23121833	23121851
chr1	23124157	23124175
chr1	23147572	23147584
chr1	23167476	23167494
chr1	23175528	23175546
chr1	23177120	23177137
chr1	23206204	23206221
chr1	23206662	23206674
chr1	23233026	23233043
chr1	23236744	23236756
chr1	23253602	23253619
chr1	23270799	23270811
chr1	23293827	23293839
chr1	23331268	23331280
chr1	23377815	23377827
chr1	23390238	23390250
chr1	23423745	23423757
chr1	23433166	23433178
chr1	23460111	23460129
chr1	23502441	23502458
chr1	23571020	23571032
chr1	23572903	23572915
chr1	23584031	23584048
chr1	23617053	23617071
chr1	23624017	23624029
chr1	23640267	23640279
chr1	23651742	23651759
chr1	23689020	23689038
chr1	23691061	23691073
chr1	23691483	23691501
chr1	23712555	23712567
chr1	23715068	23715080
chr1	23720745	23720762
chr1	23764621	23764633
chr1	23769791	23769803
chr1	23770774	23770786
chr1	23789950	23789962
chr1	23799784	23799801
chr1	23814308	23814320
chr1	23834096	23834114
chr1	23857378	23857395
chr1	23863588	23863600
chr1	23913107	23913125
chr1	23924083	23924095
chr1	23927288	23927306
chr1	23962105	23962117
chr1	23978541	23978553
chr1	23995290	23995302
chr1	24002462	24002474
chr1	24008442	24008454
chr1	24008465	24008483
chr1	24018437	24018449
chr1	24020244	24020256
chr1	24026131	24026149
chr1	24029215	24029232
chr1	24041084	24041101
chr1	24066358	24066376
chr1	24066436	24066448
chr1	24085107	24085119
chr1	24123784	24123796
chr1	24135882	24135900
chr1	24137196	24137208
chr1	24141902	24141919
chr1	24144156	24144168
chr1	24150329	24150341
chr1	24178489	24178501
chr1	24188229	24188247
chr1	24194487	24194499
chr1	24246304	24246322
chr1	24256167	24256184
chr1	24263449	24263467
chr1	24268217	24268229
chr1	24291409	24291421
chr1	24304429	24304441
chr1	24307736	24307748
chr1	24309682	24309700
chr1	24323184	24323196
chr1	24350790	24350807
chr1	24366809	24366821
chr1	24374569	24374581
chr1	24381945	24381957
chr1	24385480	24385498
chr1	24407303	24407315
chr1	24427474	24427486
chr1	24499957	24499969
chr1	24543367	24543379
chr1	24573874	24573886
chr1	24587475	24587487
chr1	24593415	24593427
chr1	24632329	24632346
chr1	24649937	24649949
chr1	24654531	24654543
chr1	24672463	24672481
chr1	24677905	24677923
chr1	24737861	24737878
chr1	24738424	24738442
chr1	24744437	24744455
chr1	24770079	24770097
chr1	24773887	24773899
chr1	24775497	24775509
chr1	24776664	24776676
chr1	24781320	24781332
chr1	24803660	24803672
chr1	24813779	24813797
chr1	24814082	24814094
chr1	24824413	24824430
chr1	24844396	24844408
chr1	24846330	24846347
chr1	24861584	24861596
chr1	24893475	24893487
chr1	24896826	24896838
chr1	24958300	24958318
chr1	24990069	24990081
chr1	25026302	25026314
chr1	25064055	25064067
chr1	25066599	25066617
chr1	25099838	25099850
chr1	25111223	25111240
chr1	25142583	25142595
chr1	25197677	25197689
chr1	25202022	25202034
chr1	25281638	25281650
chr1	25306430	25306442
chr1	25388061	25388073
chr1	25403054	25403071
chr1	25447009	25447021
chr1	25462921	25462933
chr1	25506957	25506975
chr1	25528648	25528666
chr1	25567344	25567362
chr1	25573473	25573485
chr1	25583984	25583996
chr1	25625067	25625079
chr1	25673998	25674010
chr1	25700692	25700704
chr1	25715390	25715402
chr1	25750941	25750953
chr1	25753284	25753302
chr1	25753765	25753782
chr1	25758702	25758714
chr1	25857358	25857370
chr1	25897771	25897789
chr1	25942103	25942115
chr1	25951216	25951228
chr1	25969435	25969447
chr1	25998404	25998421
chr1	26032860	26032877
chr1	26066347	26066359
chr1	26100236	26100248
chr1	26104838	26104850
chr1	26133342	26133354
chr1	26170379	26170391
chr1	26222310	26222322
chr1	26228331	26228343
chr1	26274312	26274324
chr1	26326233	26326245
chr1	26378080	26378092
chr1	26396446	26396464
chr1	26401891	26401903
chr1	26510173	26510185
chr1	26525487	26525504
chr1	26551925	26551937
chr1	26572914	26572926
chr1	26616654	26616666
chr1	26680982	26680994
chr1	26690225	26690237
chr1	26769628	26769640
chr1	26881224	26881241
chr1	26885333	26885351
chr1	26894893	26894905
chr1	26956940	26956957
chr1	26959329	26959347
chr1	27049677	27049689
chr1	27062091	27062103
chr1	27069864	27069876
chr1	27086987	27086999
chr1	27152434	27152446
chr1	27182923	27182935
chr1	27186330	27186342
chr1	27216540	27216557
chr1	27216964	27216976
chr1	27234573	27234585
chr1	27263947	27263959
chr1	27274752	27274764
chr1	27305017	27305035
chr1	27326718	27326730
chr1	27365300	27365312
chr1	27374016	27374028
chr1	27375986	27375998
chr1	27454001	27454013
chr1	27481943	27481961
chr1	27542528	27542540
chr1	27579594	27579606
chr1	27613457	27613469
chr1	27674111	27674123
chr1	27700922	27700934
chr1	27788780	27788798
chr1	27796408	27796420
chr1	27835787	27835799
chr1	27907869	27907881
chr1	27913848	27913860
chr1	27952365	27952377
chr1	27957298	27957316
chr1	28033558	28033570
chr1	28063910	28063922
chr1	28156523	28156541
chr1	28173919	28173931
chr1	28206022	28206034
chr1	28286660	28286672
chr1	28319387	28319399
chr1	28362446	28362458
chr1	28398136	28398148
chr1	28408561	28408573
chr1	28432955	28432972
chr1	28465029	28465041
chr1	28472148	28472160
chr1	28505907	28505919
chr1	28662545	28662557
chr1	28686160	28686172
chr1	28748117	28748129
chr1	28749852	28749864
chr1	28772173	28772191
chr1	28841326	28841338
chr1	28898681	28898693
chr1	28982537	28982549
chr1	28989732	28989744
chr1	29097017	29097029
chr1	29111227	29111244
chr1	29219870	29219882
chr1	29329003	29329021
chr1	29334596	29334608
chr1	29455519	29455531
chr1	29477529	29477541
chr1	29512941	29512953
chr1	29526038	29526050
chr1	29596825	29596837
chr1	29623154	29623172
chr1	29702516	29702528
chr1	29710048	29710065
chr1	29798661	29798678
chr1	29851832	29851844
chr1	29893900	29893912
chr1	29898561	29898573
chr1	29949162	29949174
chr1	29959942	29959954
chr1	29998115	29998127
chr1	30126904	30126916
chr1	30144351	30144368
chr1	30253853	30253865
chr1	30256899	30256911
chr1	30294273	30294285
chr1	30316577	30316594
chr1	30324991	30325003
chr1	30351081	30351093
chr1	30360664	30360676
chr1	30395388	30395405
chr1	30397262	30397280
chr1	30431292	30431304
chr1	30444528	30444540
chr1	30504125	30504142
chr1	30543837	30543849
chr1	30559316	30559328
chr1	30560277	30560289
chr1	30562776	30562788
chr1	30601877	30601889
chr1	30641130	30641148
chr1	30641885	30641897
chr1	30643353	30643365
chr1	30653144	30653161
chr1	30665910	30665922
chr1	30694800	30694812
chr1	30749235	30749247
chr1	30753381	30753398
chr1	30756136	30756153
chr1	30757414	30757432
chr1	30766001	30766018
chr1	30770256	30770268
chr1	30790342	30790354
chr1	30803034	30803046
chr1	30820389	30820401
chr1	30826215	30826227
chr1	30828850	30828862
chr1	30835688	30835706
chr1	30837290	30837308
chr1	30856483	30856495
chr1	30937635	30937647
chr1	30947599	30947616
chr1	30975393	30975411
chr1	30977786	30977804
chr1	30977879	30977891
chr1	30978605	30978622
chr1	30983448	30983460
chr1	30987876	30987893
chr1	31000615	31000632
chr1	31020287	31020299
chr1	31079837	31079855
chr1	31094604	31094621
chr1	31117019	31117031
chr1	31175179	31175196
chr1	31177303	31177320
chr1	31211012	31211024
chr1	31267153	31267165
chr1	31294504	31294516
chr1	31318124	31318136
chr1	31336057	31336069
chr1	31394140	31394152
chr1	31409538	31409550
chr1	31436057	31436069
chr1	31452500	31452517
chr1	31561033	31561045
chr1	31598944	31598956
chr1	31606216	31606228
chr1	31610972	31610989
chr1	31654835	31654864
chr1	31662896	31662908
chr1	31674017	31674034
chr1	31704773	31704791
chr1	31784376	31784388
chr1	31788176	31788188
chr1	31808038	31808050
chr1	31847385	31847397
chr1	31883141	31883158
chr1	31892304	31892316
chr1	31910408	31910420
chr1	31948911	31948923
chr1	31977029	31977041
chr1	32008942	32008954
chr1	32052887	32052899
chr1	32083302	32083314
chr1	32229838	32229850
chr1	32231539	32231551
chr1	32232664	32232676
chr1	32261948	32261960
chr1	32277989	32278006
chr1	32319737	32319749
chr1	32378554	32378566
chr1	32418593	32418605
chr1	32462937	32462949
chr1	32488435	32488447
chr1	32540056	32540068
chr1	32609693	32609705
chr1	32623519	32623536
chr1	32669699	32669711
chr1	32681776	32681788
chr1	32757179	32757196
chr1	32814300	32814312
chr1	32825562	32825580
chr1	32828340	32828358
chr1	32872699	32872711
chr1	32886257	32886269
chr1	32905065	32905082
chr1	32909543	32909555
chr1	32980807	32980819
chr1	33004163	33004175
chr1	33022009	33022027
chr1	33035488	33035500
chr1	33036782	33036799
chr1	33042034	33042046
chr1	33047712	33047729
chr1	33079891	33079908
chr1	33116075	33116092
chr1	33230690	33230702
chr1	33321697	33321709
chr1	33353170	33353188
chr1	33366131	33366143
chr1	33390662	33390674
chr1	33397820	33397832
chr1	33422543	33422555
chr1	33458694	33458706
chr1	33473953	33473965
chr1	33489037	33489049
chr1	33559383	33559400
chr1	33565741	33565759
chr1	33569698	33569715
chr1	33572265	33572277
chr1	33593651	33593668
chr1	33630355	33630372
chr1	33654054	33654072
chr1	33667873	33667890
chr1	33677125	33677137
chr1	33684853	33684865
chr1	33697663	33697681
chr1	33703237	33703254
chr1	33716123	33716140
chr1	33717503	33717515
chr1	33718357	33718369
chr1	33719297	33719309
chr1	33729509	33729527
chr1	33741498	33741516
chr1	33742161	33742178
chr1	33759339	33759351
chr1	33767427	33767439
chr1	33774897	33774909
chr1	33779732	33779744
chr1	33780085	33780102
chr1	33790445	33790457
chr1	33791910	33791927
chr1	33794851	33794869
chr1	33796385	33796402
chr1	33798102	33798114
chr1	33799870	33799887
chr1	33800254	33800271
chr1	33806134	33806156
chr1	33810062	33810080
chr1	33817589	33817606
chr1	33839397	33839415
chr1	33841264	33841281
chr1	33867037	33867054
chr1	33871533	33871545
chr1	33891481	33891493
chr1	33899035	33899052
chr1	33903851	33903863
chr1	33906423	33906440
chr1	33907660	33907672
chr1	33913330	33913348
chr1	33926874	33926892
chr1	33929495	33929512
chr1	33930730	33930747
chr1	33931547	33931559
chr1	33932726	33932743
chr1	33937992	33938004
chr1	33940874	33940892
chr1	33942222	33942240
chr1	33949796	33949814
chr1	33989586	33989603
chr1	33993564	33993576
chr1	34004924	34004941
chr1	34005887	34005899
chr1	34013675	34013687
chr1	34023367	34023384
chr1	34052873	34052885
chr1	34054788	34054805
chr1	34059596	34059614
chr1	34077929	34077947
chr1	34084163	34084175
chr1	34086645	34086657
chr1	34094474	34094486
chr1	34098512	34098524
chr1	34106651	34106668
chr1	34107408	34107426
chr1	34118396	34118408
chr1	34121497	34121515
chr1	34125364	34125376
chr1	34139181	34139193
chr1	34147363	34147381
chr1	34149199	34149211
chr1	34152501	34152513
chr1	34153353	34153370
chr1	34166591	34166603
chr1	34174726	34174738
chr1	34175494	34175506
chr1	34183093	34183105
chr1	34186223	34186235
chr1	34202066	34202078
chr1	34221685	34221697
chr1	34225192	34225204
chr1	34225525	34225543
chr1	34230243	34230261
chr1	34231911	34231929
chr1	34246976	34246994
chr1	34258493	34258505
chr1	34263971	34263983
chr1	34270318	34270335
chr1	34275345	34275363
chr1	34281618	34281630
chr1	34284535	34284547
chr1	34289551	34289569
chr1	34303939	34303951
chr1	34329777	34329795
chr1	34342317	34342335
chr1	34351255	34351267
chr1	34359049	34359061
chr1	34370415	34370432
chr1	34371042	34371054
chr1	34379264	34379276
chr1	34411044	34411056
chr1	34418186	34418203
chr1	34443181	34443193
chr1	34466912	34466929
chr1	34469913	34469925
chr1	34471575	34471592
chr1	34477813	34477825
chr1	34492703	34492720
chr1	34499015	34499027
chr1	34514702	34514714
chr1	34516728	34516740
chr1	34519838	34519856
chr1	34522152	34522169
chr1	34525942	34525959
chr1	34527507	34527519
chr1	34529452	34529469
chr1	34531673	34531685
chr1	34539668	34539686
chr1	34544446	34544463
chr1	34558789	34558801
chr1	34558889	34558901
chr1	34561608	34561626
chr1	34565056	34565068
chr1	34568099	34568111
chr1	34573058	34573070
chr1	34574359	34574371
chr1	34575276	34575288
chr1	34576429	34576441
chr1	34577837	34577854
chr1	34584130	34584142
chr1	34585977	34585994
chr1	34588794	34588812
chr1	34590065	34590077
chr1	34591192	34591204
chr1	34592095	34592107
chr1	34593906	34593918
chr1	34598221	34598233
chr1	34616066	34616078
chr1	34620900	34620912
chr1	34625641	34625653
chr1	34631066	34631083
chr1	34641052	34641064
chr1	34642983	34643001
chr1	34656562	34656574
chr1	34659404	34659421
chr1	34682980	34682992
chr1	34683029	34683046
chr1	34683680	34683692
chr1	34693189	34693206
chr1	34698539	34698556
chr1	34699482	34699494
chr1	34703903	34703915
chr1	34722472	34722484
chr1	34738203	34738220
chr1	34757717	34757734
chr1	34775521	34775533
chr1	34778565	34778577
chr1	34781400	34781412
chr1	34782978	34782995
chr1	34785876	34785888
chr1	34792932	34792944
chr1	34795384	34795402
chr1	34800372	34800384
chr1	34804306	34804318
chr1	34805022	34805039
chr1	34808317	34808329
chr1	34833456	34833474
chr1	34848781	34848799
chr1	34852026	34852044
chr1	34855511	34855523
chr1	34864976	34864994
chr1	34899883	34899895
chr1	34903801	34903818
chr1	34924182	34924200
chr1	34933375	34933393
chr1	34953956	34953968
chr1	34960928	34960946
chr1	35003164	35003182
chr1	35003208	35003225
chr1	35004922	35004934
chr1	35018690	35018702
chr1	35020840	35020852
chr1	35029630	35029648
chr1	35030190	35030207
chr1	35045662	35045679
chr1	35066988	35067000
chr1	35073237	35073255
chr1	35089638	35089656
chr1	35095250	35095262
chr1	35102937	35102949
chr1	35112959	35112971
chr1	35131095	35131112
chr1	35154098	35154110
chr1	35157831	35157843
chr1	35186727	35186745
chr1	35190021	35190033
chr1	35201719	35201731
chr1	35205031	35205043
chr1	35207602	35207614
chr1	35238986	35239004
chr1	35257258	35257276
chr1	35260867	35260884
chr1	35273897	35273914
chr1	35323675	35323692
chr1	35342143	35342155
chr1	35354527	35354539
chr1	35370257	35370275
chr1	35413817	35413829
chr1	35430404	35430416
chr1	35442400	35442412
chr1	35443028	35443040
chr1	35449455	35449467
chr1	35482045	35482057
chr1	35493987	35493999
chr1	35504380	35504397
chr1	35522127	35522139
chr1	35532929	35532941
chr1	35535285	35535302
chr1	35557120	35557132
chr1	35584695	35584707
chr1	35722817	35722834
chr1	35723557	35723569
chr1	35735029	35735046
chr1	35745740	35745752
chr1	35760941	35760953
chr1	35762555	35762567
chr1	35772979	35772996
chr1	35783642	35783654
chr1	35817182	35817199
chr1	35822622	35822634
chr1	35836527	35836545
chr1	35840471	35840483
chr1	35896434	35896446
chr1	35896527	35896545
chr1	35962966	35962978
chr1	35972014	35972031
chr1	35973166	35973178
chr1	35978651	35978668
chr1	36006087	36006105
chr1	36007190	36007202
chr1	36016730	36016747
chr1	36022999	36023016
chr1	36032181	36032193
chr1	36037467	36037479
chr1	36037677	36037694
chr1	36040136	36040148
chr1	36045686	36045698
chr1	36064970	36064988
chr1	36067192	36067204
chr1	36070451	36070468
chr1	36092340	36092352
chr1	36108642	36108654
chr1	36117013	36117025
chr1	36125812	36125824
chr1	36131115	36131127
chr1	36134459	36134471
chr1	36157862	36157874
chr1	36159031	36159049
chr1	36163890	36163907
chr1	36164077	36164094
chr1	36191646	36191663
chr1	36195733	36195745
chr1	36202074	36202092
chr1	36206450	36206462
chr1	36207377	36207394
chr1	36242091	36242108
chr1	36250795	36250813
chr1	36262196	36262208
chr1	36262483	36262501
chr1	36263844	36263861
chr1	36270081	36270099
chr1	36273896	36273908
chr1	36293624	36293641
chr1	36294164	36294176
chr1	36305318	36305335
chr1	36308518	36308530
chr1	36309853	36309870
chr1	36313275	36313293
chr1	36315375	36315387
chr1	36316743	36316761
chr1	36320319	36320331
chr1	36331010	36331027
chr1	36334302	36334314
chr1	36334923	36334941
chr1	36335118	36335130
chr1	36336234	36336251
chr1	36336593	36336605
chr1	36337317	36337334
chr1	36345221	36345238
chr1	36347583	36347601
chr1	36351944	36351956
chr1	36355273	36355290
chr1	36357977	36357989
chr1	36362573	36362585
chr1	36367629	36367647
chr1	36369549	36369566
chr1	36381062	36381074
chr1	36382276	36382294
chr1	36428641	36428658
chr1	36445952	36445964
chr1	36453582	36453600
chr1	36456846	36456858
chr1	36465968	36465985
chr1	36496846	36496858
chr1	36505610	36505627
chr1	36506986	36507003
chr1	36511453	36511465
chr1	36528589	36528601
chr1	36535306	36535318
chr1	36545684	36545696
chr1	36546224	36546242
chr1	36553792	36553804
chr1	36570746	36570758
chr1	36579261	36579273
chr1	36587614	36587626
chr1	36598060	36598072
chr1	36604231	36604243
chr1	36607472	36607484
chr1	36608675	36608692
chr1	36612542	36612554
chr1	36614097	36614109
chr1	36618497	36618509
chr1	36620101	36620113
chr1	36640453	36640465
chr1	36646124	36646136
chr1	36652652	36652664
chr1	36655808	36655820
chr1	36673011	36673028
chr1	36681330	36681347
chr1	36691981	36691993
chr1	36693560	36693577
chr1	36696818	36696835
chr1	36709112	36709124
chr1	36713376	36713388
chr1	36717646	36717658
chr1	36719585	36719603
chr1	36720389	36720401
chr1	36721469	36721486
chr1	36726172	36726184
chr1	36729010	36729028
chr1	36735047	36735065
chr1	36738132	36738144
chr1	36741111	36741123
chr1	36741165	36741182
chr1	36741601	36741613
chr1	36742986	36743004
chr1	36743797	36743809
chr1	36746072	36746084
chr1	36753439	36753456
chr1	36766252	36766264
chr1	36791347	36791359
chr1	36792992	36793009
chr1	36794341	36794359
chr1	36795605	36795617
chr1	36801631	36801648
chr1	36802548	36802560
chr1	36803500	36803512
chr1	36804532	36804544
chr1	36812250	36812267
chr1	36812448	36812465
chr1	36814142	36814154
chr1	36814693	36814705
chr1	36839616	36839628
chr1	36841663	36841681
chr1	36843424	36843436
chr1	36843961	36843979
chr1	36844005	36844022
chr1	36848232	36848249
chr1	36862481	36862493
chr1	36862519	36862536
chr1	36866341	36866353
chr1	36876599	36876616
chr1	36878942	36878960
chr1	36880586	36880598
chr1	36887358	36887370
chr1	36890845	36890862
chr1	36905069	36905081
chr1	36910121	36910138
chr1	36947186	36947198
chr1	36962836	36962848
chr1	36988680	36988697
chr1	36990092	36990109
chr1	37030165	37030177
chr1	37054745	37054757
chr1	37059491	37059503
chr1	37060043	37060055
chr1	37091508	37091526
chr1	37096350	37096368
chr1	37097624	37097642
chr1	37105293	37105311
chr1	37112415	37112433
chr1	37118288	37118300
chr1	37123861	37123873
chr1	37155484	37155502
chr1	37155727	37155745
chr1	37156992	37157004
chr1	37163025	37163037
chr1	37167924	37167942
chr1	37175807	37175819
chr1	37185684	37185702
chr1	37189229	37189241
chr1	37189483	37189495
chr1	37205410	37205422
chr1	37206530	37206542
chr1	37208919	37208931
chr1	37225932	37225944
chr1	37237939	37237951
chr1	37251592	37251604
chr1	37268380	37268392
chr1	37268799	37268816
chr1	37285375	37285392
chr1	37285577	37285589
chr1	37293102	37293119
chr1	37293316	37293333
chr1	37306178	37306196
chr1	37307359	37307371
chr1	37307706	37307723
chr1	37311720	37311732
chr1	37315476	37315494
chr1	37320101	37320119
chr1	37329501	37329519
chr1	37330161	37330173
chr1	37353396	37353408
chr1	37384120	37384137
chr1	37386171	37386189
chr1	37386709	37386727
chr1	37394259	37394271
chr1	37402619	37402631
chr1	37406727	37406739
chr1	37433219	37433231
chr1	37435463	37435475
chr1	37450878	37450890
chr1	37458707	37458724
chr1	37470817	37470835
chr1	37505388	37505406
chr1	37517107	37517124
chr1	37517731	37517748
chr1	37523633	37523651
chr1	37533079	37533091
chr1	37539248	37539260
chr1	37541420	37541432
chr1	37550532	37550544
chr1	37562362	37562374
chr1	37565362	37565384
chr1	37595727	37595744
chr1	37603584	37603596
chr1	37610395	37610412
chr1	37610608	37610625
chr1	37631986	37631998
chr1	37653671	37653683
chr1	37663657	37663669
chr1	37682496	37682508
chr1	37691683	37691700
chr1	37694083	37694101
chr1	37696200	37696212
chr1	37698966	37698984
chr1	37711046	37711063
chr1	37711585	37711602
chr1	37729636	37729648
chr1	37732485	37732497
chr1	37735427	37735445
chr1	37747686	37747704
chr1	37751619	37751631
chr1	37763762	37763774
chr1	37765315	37765332
chr1	37765651	37765663
chr1	37775620	37775637
chr1	37775876	37775888
chr1	37776544	37776556
chr1	37786031	37786049
chr1	37816459	37816476
chr1	37824595	37824607
chr1	37846501	37846513
chr1	37849055	37849073
chr1	37856467	37856479
chr1	37859327	37859344
chr1	37921962	37921974
chr1	37924104	37924121
chr1	37935371	37935389
chr1	37938832	37938844
chr1	37948445	37948457
chr1	37953665	37953682
chr1	37957956	37957968
chr1	37958568	37958585
chr1	37958761	37958773
chr1	37960193	37960211
chr1	37961682	37961699
chr1	37974419	37974431
chr1	37981571	37981589
chr1	37991904	37991916
chr1	38003218	38003235
chr1	38015291	38015303
chr1	38018771	38018783
chr1	38025215	38025232
chr1	38030503	38030521
chr1	38041560	38041572
chr1	38042797	38042814
chr1	38046862	38046874
chr1	38073711	38073723
chr1	38076953	38076971
chr1	38079711	38079729
chr1	38089982	38089994
chr1	38120465	38120482
chr1	38129115	38129127
chr1	38135699	38135716
chr1	38141144	38141162
chr1	38153660	38153677
chr1	38186970	38186982
chr1	38207350	38207367
chr1	38210469	38210486
chr1	38234721	38234733
chr1	38238190	38238202
chr1	38242529	38242547
chr1	38247735	38247747
chr1	38259801	38259813
chr1	38269980	38269997
chr1	38273523	38273535
chr1	38301513	38301530
chr1	38304374	38304386
chr1	38309723	38309741
chr1	38329009	38329027
chr1	38370372	38370390
[truncated: 185,545 more rows]
